# Supplementary material for: Convenient Synthesis of Benziodazolone: New Reagents for Direct Esterification of Alcohols and Amidation of Amines
Source: MDPI journal article supplement (doi:10.3390/molecules26237355), 2021-12-03

# Supporting Information

## Convenient Synthesis of Benziodazolone: New Reagents for Direct Esterification of Alcohols and Amidation of Amines

Michael T. Shea <sup>1</sup>, Gregory T. Rohde <sup>2</sup>, Yulia A. Vlasenko <sup>3</sup>, Pavel S. Postnikov <sup>3</sup>, Mekhman S. Yusubov <sup>1</sup>,

Viktor V. Zhdankin <sup>1\*</sup>, Akio Saito <sup>4\*</sup> and Akira Yoshimura <sup>1,3,\*</sup>

<sup>1</sup> Department of Chemistry and Biochemistry, University of Minnesota Duluth, MN 55812, USA

<sup>2</sup> Marshall School, Duluth, Minnesota 55811 USA

<sup>3</sup> The Tomsk Polytechnic University, 634050 Tomsk, Russia

<sup>4</sup> Division of Applied Chemistry, Institute of Engineering, Tokyo University of Agriculture and Technology, 2-24-16 Naka-cho, Koganei, Tokyo 184-8588, Japan

\* Correspondence: [vzhdanki@d.umn.edu](mailto:vzhdanki@d.umn.edu) (V.V.Z.), [akio-sai@cc.tuat.ac.jp](mailto:akio-sai@cc.tuat.ac.jp) (A.S.), [yoshimura@tpu.ru](mailto:yoshimura@tpu.ru) (A.Y.)

|                                                   |            |
|---------------------------------------------------|------------|
| <b>Table of Contents:</b>                         | <b>pp</b>  |
| <b>1. <i>X-Ray crystallography data of 5a</i></b> | <b>p.2</b> |
| <b>2. <i>Mass study</i></b>                       | <b>p.2</b> |
| <b>3. <i>Spectra of products</i></b>              | <b>p.3</b> |

## 1. X-Ray crystallography data of **5a**

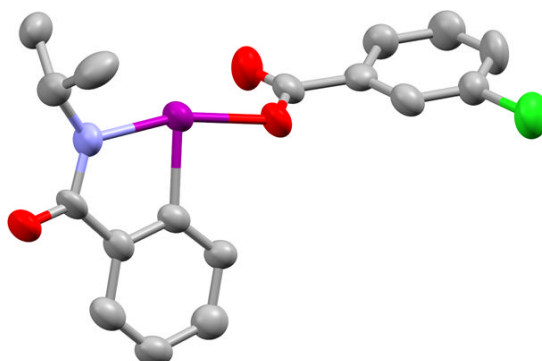

Figure S1. X-Ray crystal structure of **5a**.

Single crystals of product **5a** suitable for X-ray crystallographic analysis were obtained by slow crystallization from the acetonitrile solution. X-ray diffraction data for **5a** were collected on Rigaku RAPID II Image Plate system using graphite-monochromated CuK $\alpha$  radiation ( $\lambda = 1.54187 \text{ \AA}$ ) at 173 K. The structure was solved by Sir 2011 and refined on F<sup>2</sup> using ShelXle. Crystal data for **5a** C<sub>17</sub>H<sub>15</sub>ClINO<sub>3</sub>: monoclinic, space group P2<sub>1</sub>/c,  $a = 12.6913(3)$ ,  $b = 14.8285(4)$ ,  $c = 18.3997(13) \text{ \AA}$ ,  $\alpha = 90^\circ$ ,  $\beta = 104.695(7)^\circ$ ,  $\gamma = 90^\circ$ ,  $V = 3349.4(3) \text{ \AA}^3$ ,  $Z = 8$ , 22784 reflections measured, 5815 unique ( $4560 I > 2\sigma(I)$ );  $R_{\text{int}} = 0.0780$ ,  $R_{\text{sigma}} = 0.0834$ ,  $R_1 (I > 2\sigma(I)) = 0.0595$ ,  $R_1 = 0.0696$ ,  $wR2_{\text{all}} = 0.1700$ .  $S = 1.086$ ; Please see the cif for more detailed information: CCDC- 2122170.

## 2. Mass study

i) Reaction of **7a** with **5a** and Ph<sub>3</sub>P

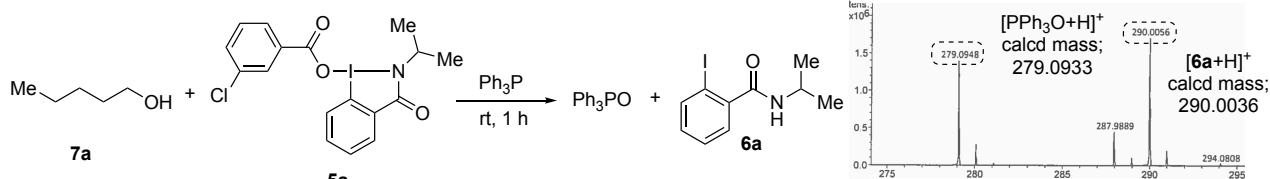

ii) Reaction of Pyridine with **5a**

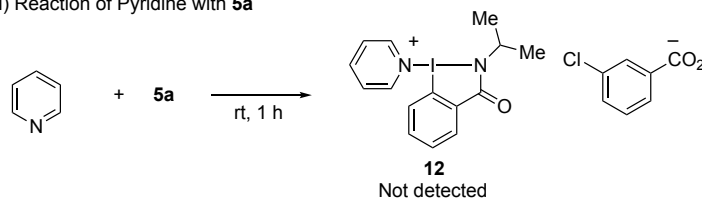

iii) Reaction of DMAP with **5a**

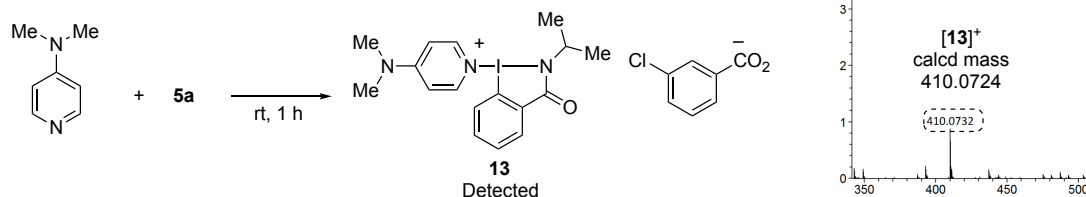

$^1\text{H}$  NMR (500 MHz,  $\text{CDCl}_3$ );

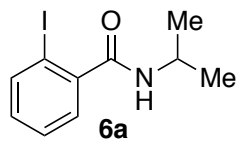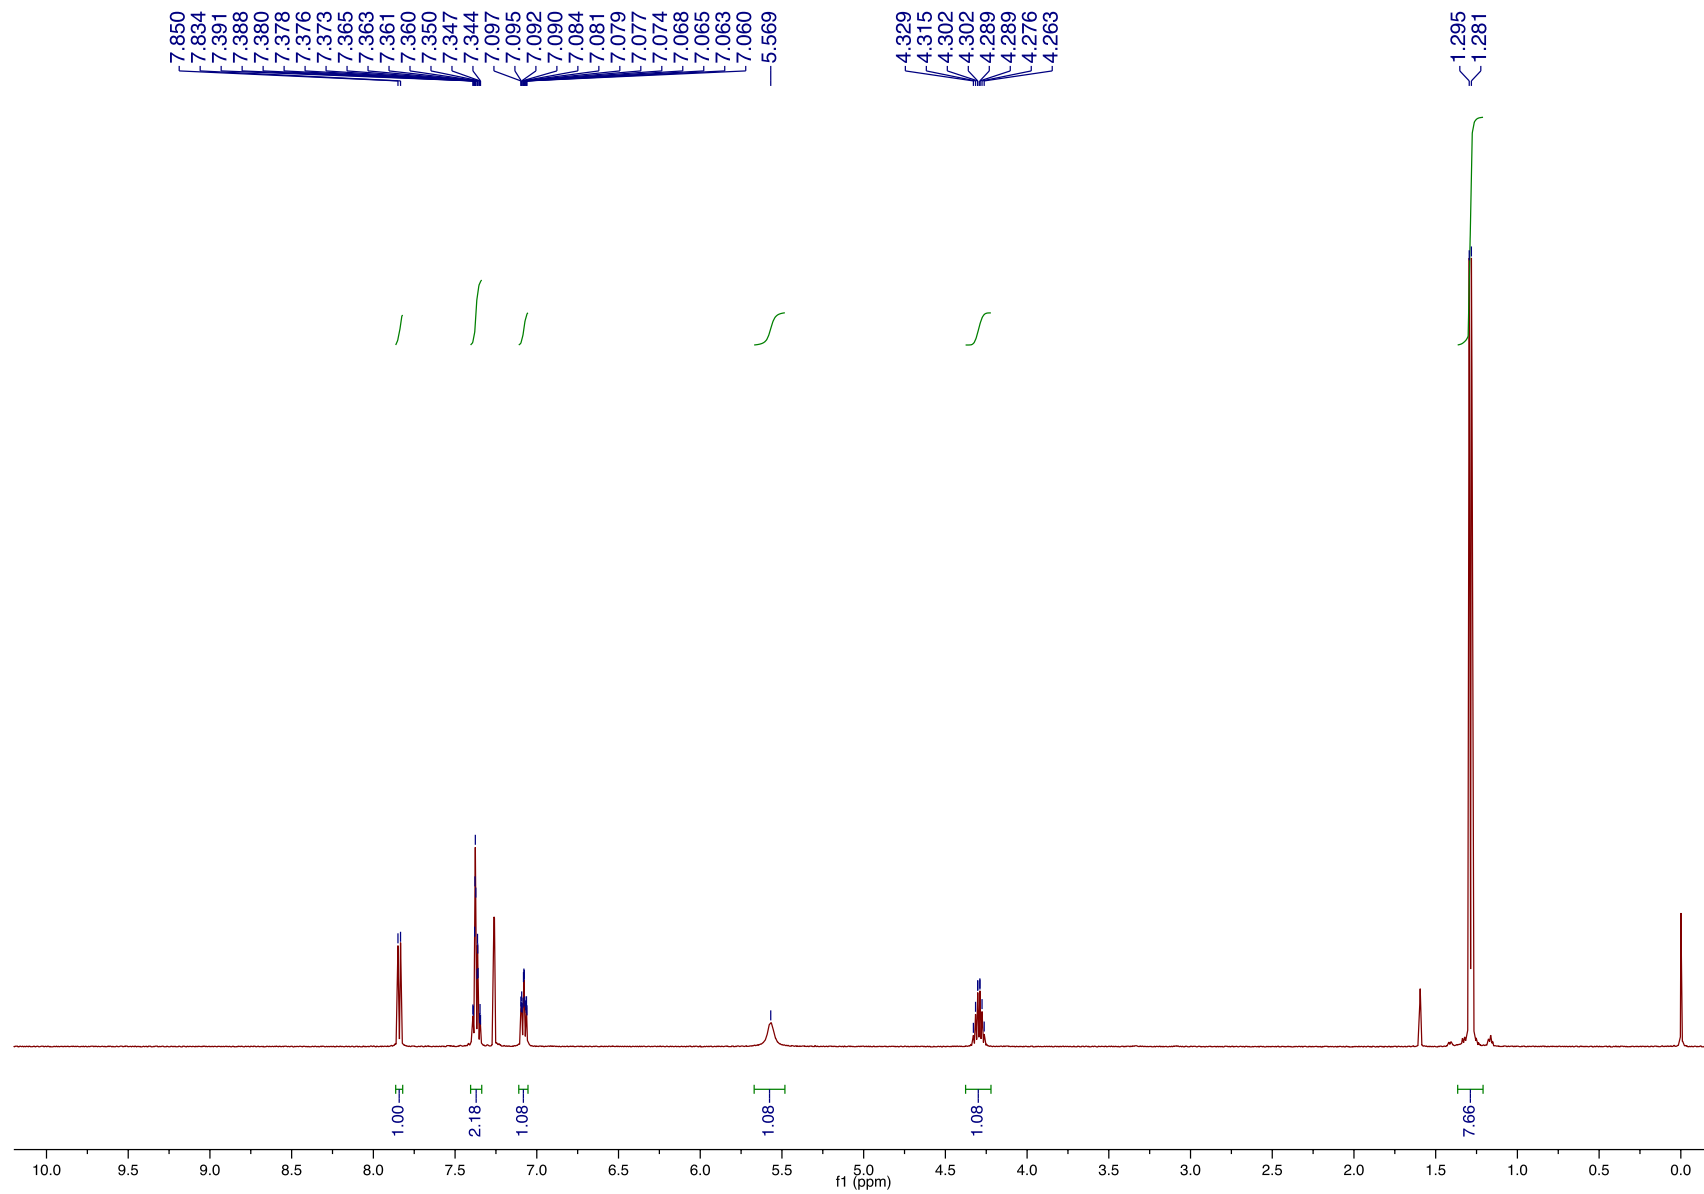

$^1\text{H}$  NMR (500 MHz,  $\text{CDCl}_3$ )

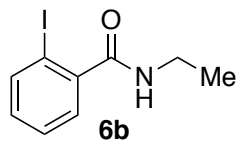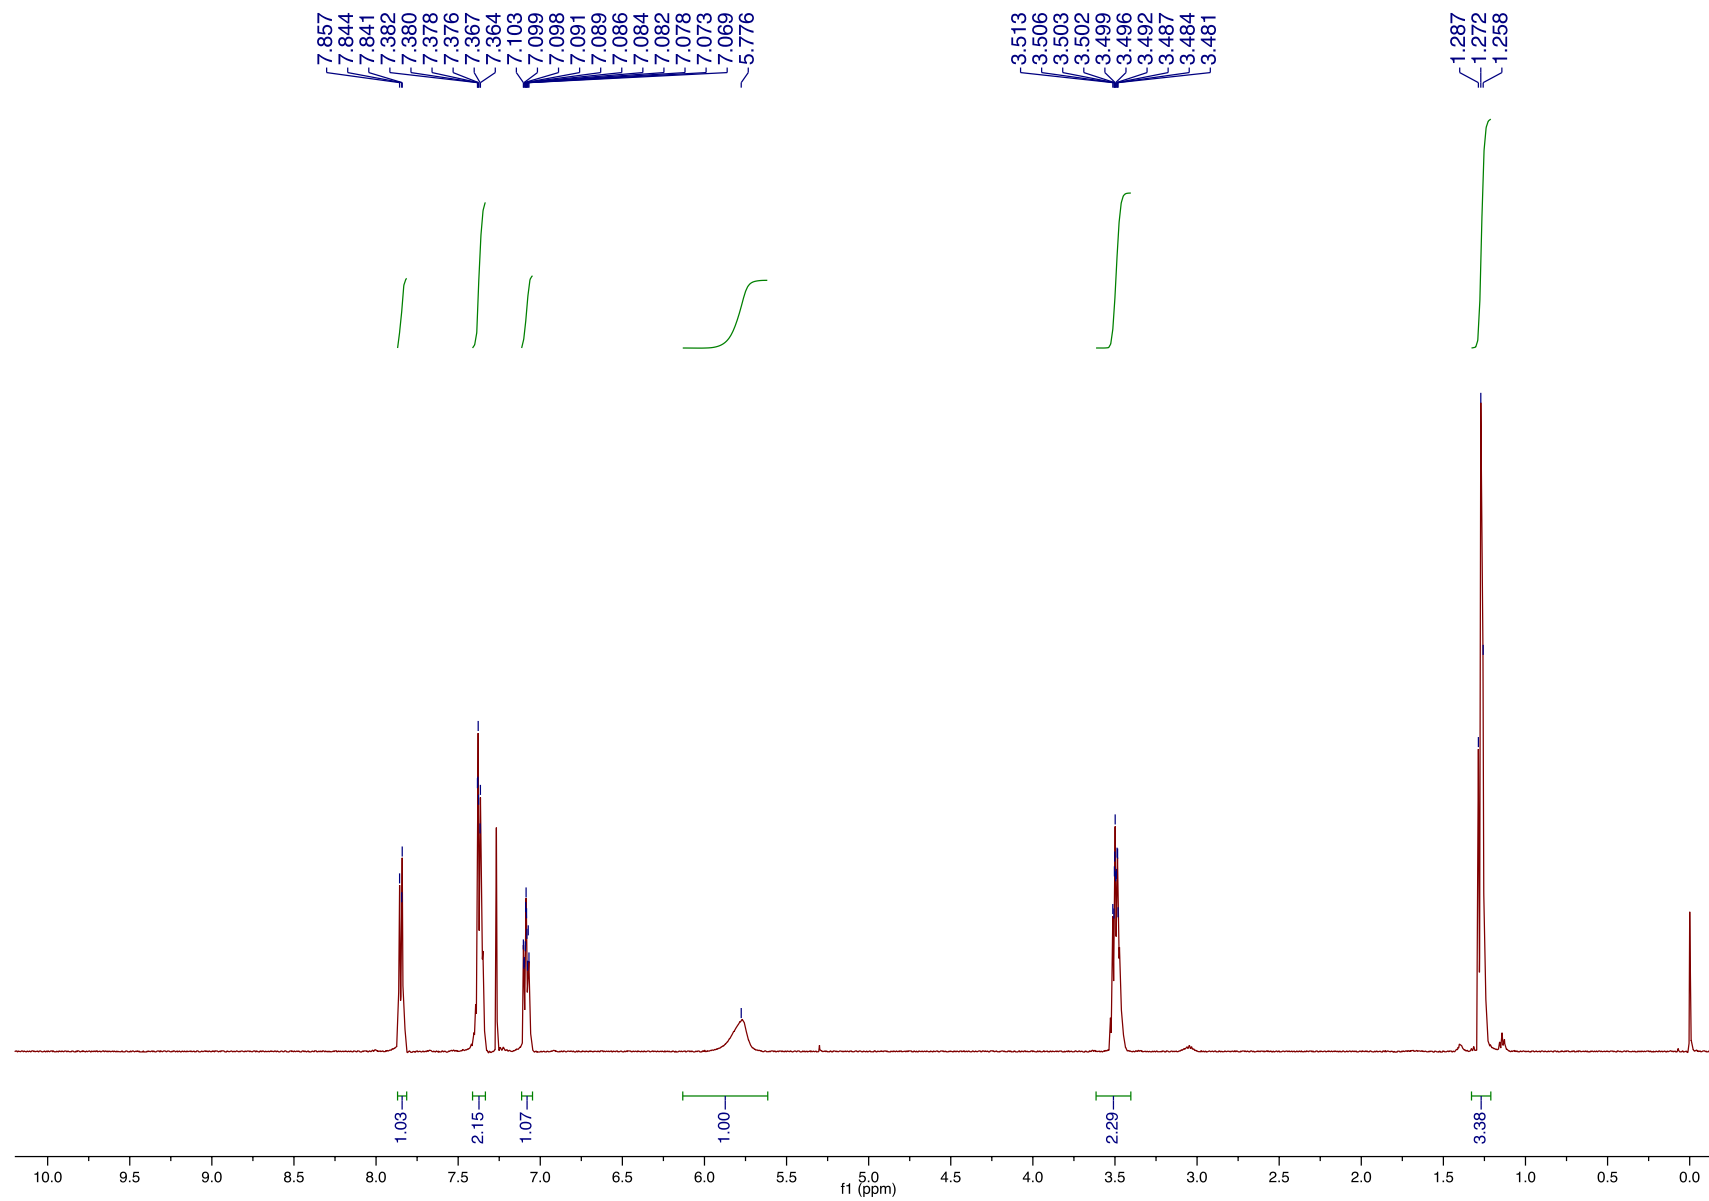

$^1\text{H}$  NMR (500 MHz,  $\text{CDCl}_3$ )

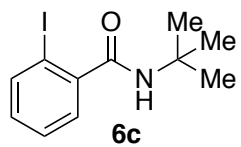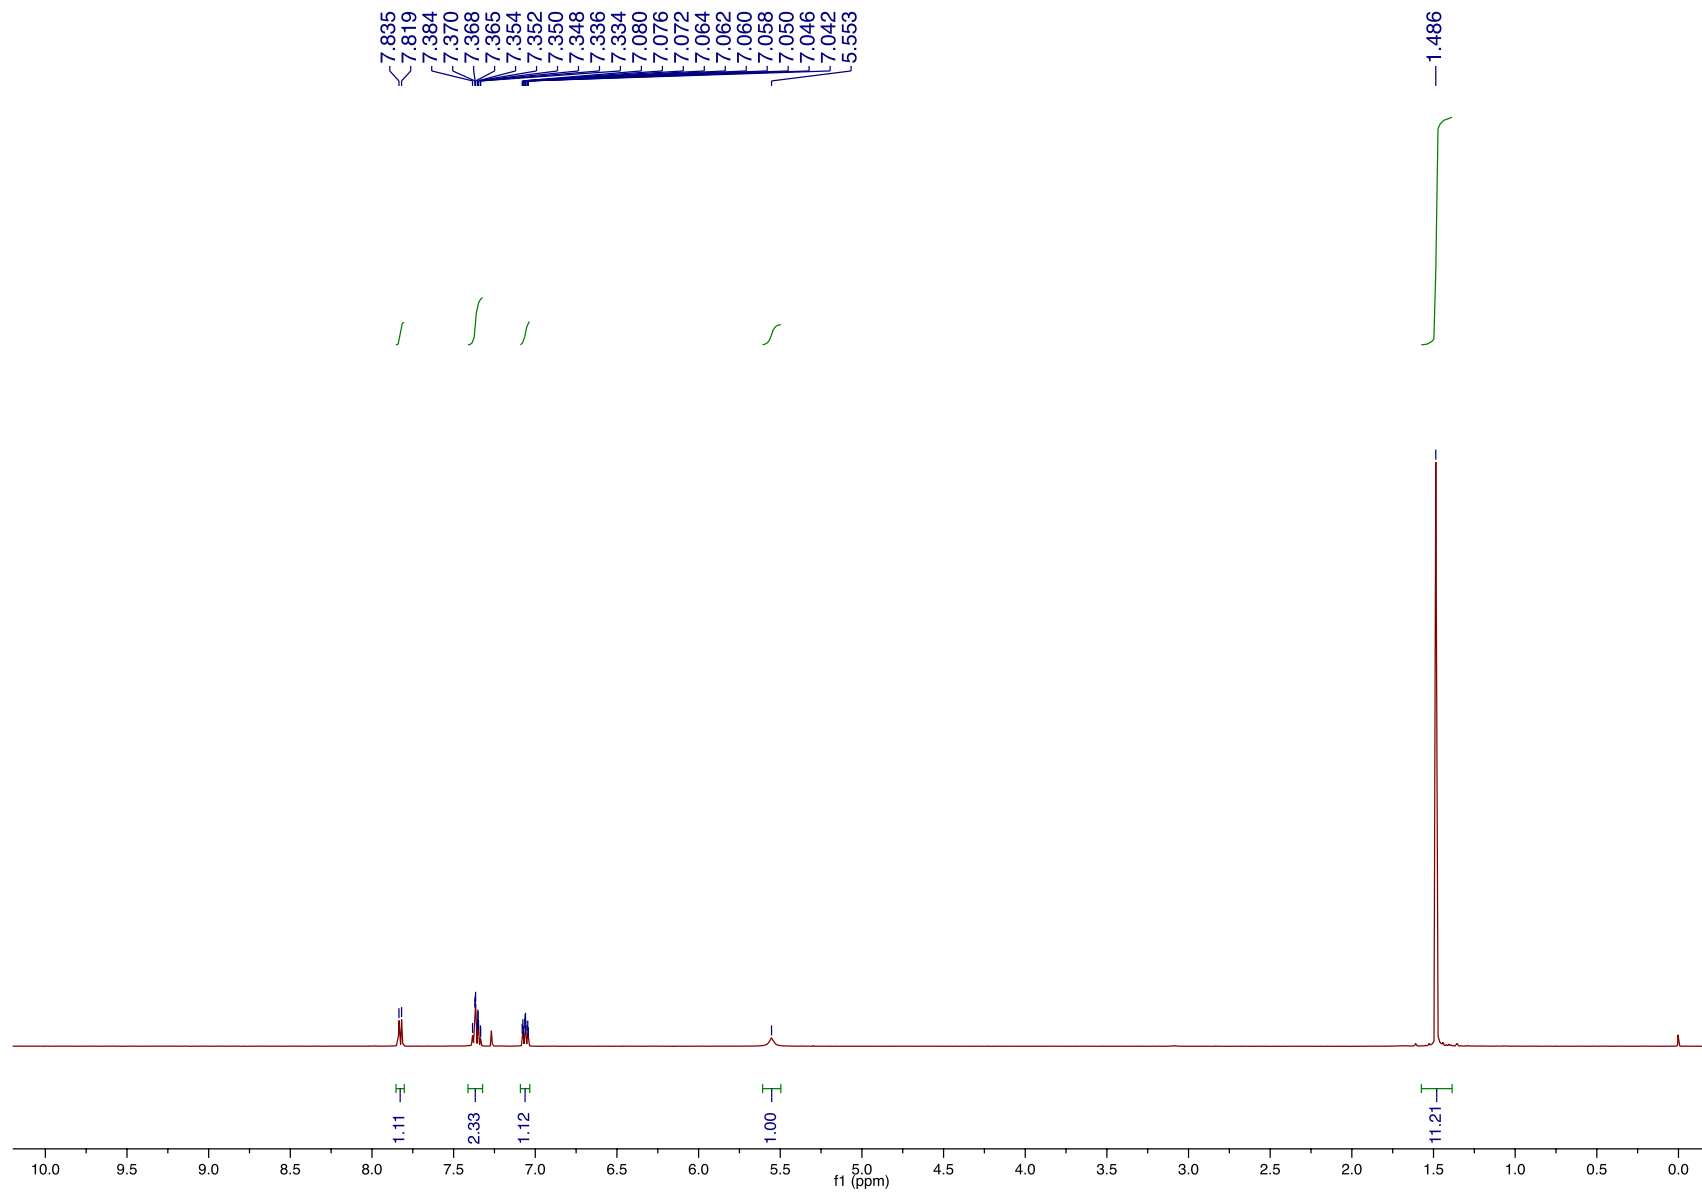

$^1\text{H}$  NMR (500 MHz,  $\text{CDCl}_3$ )

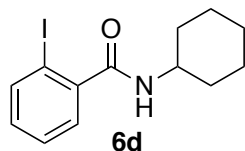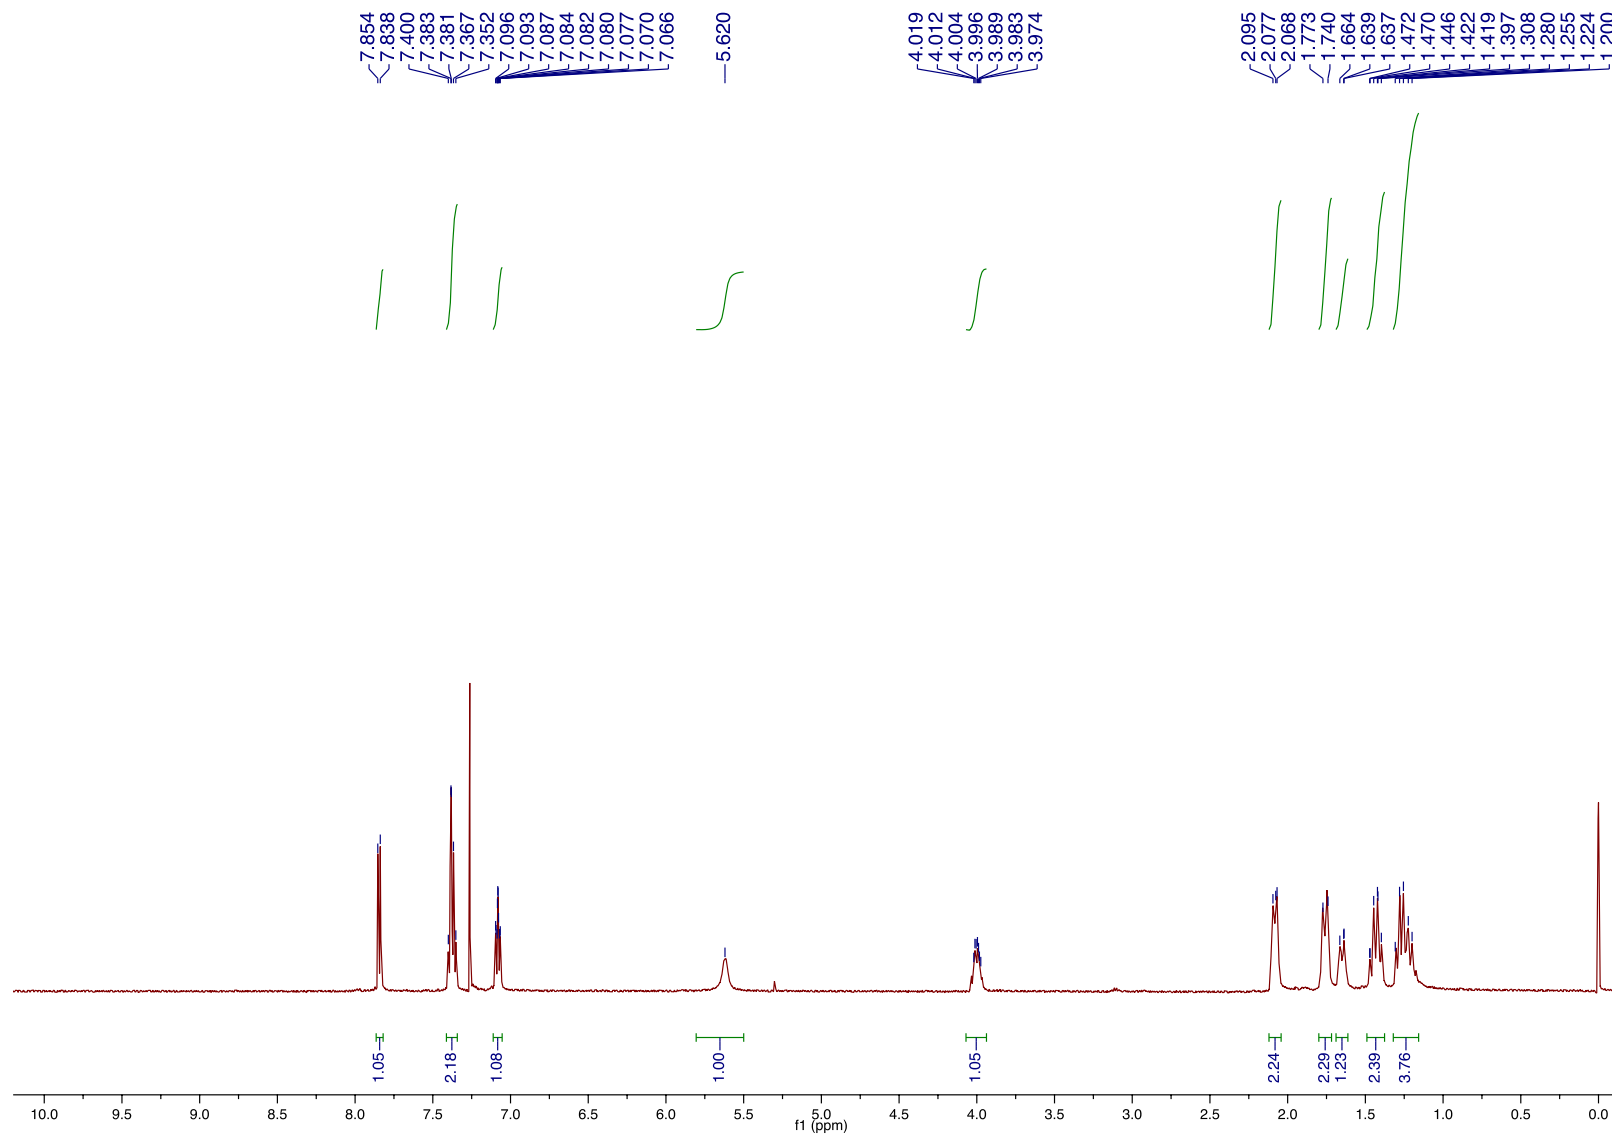

$^1\text{H}$  NMR (500 MHz,  $\text{CDCl}_3$ )

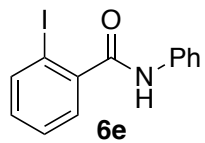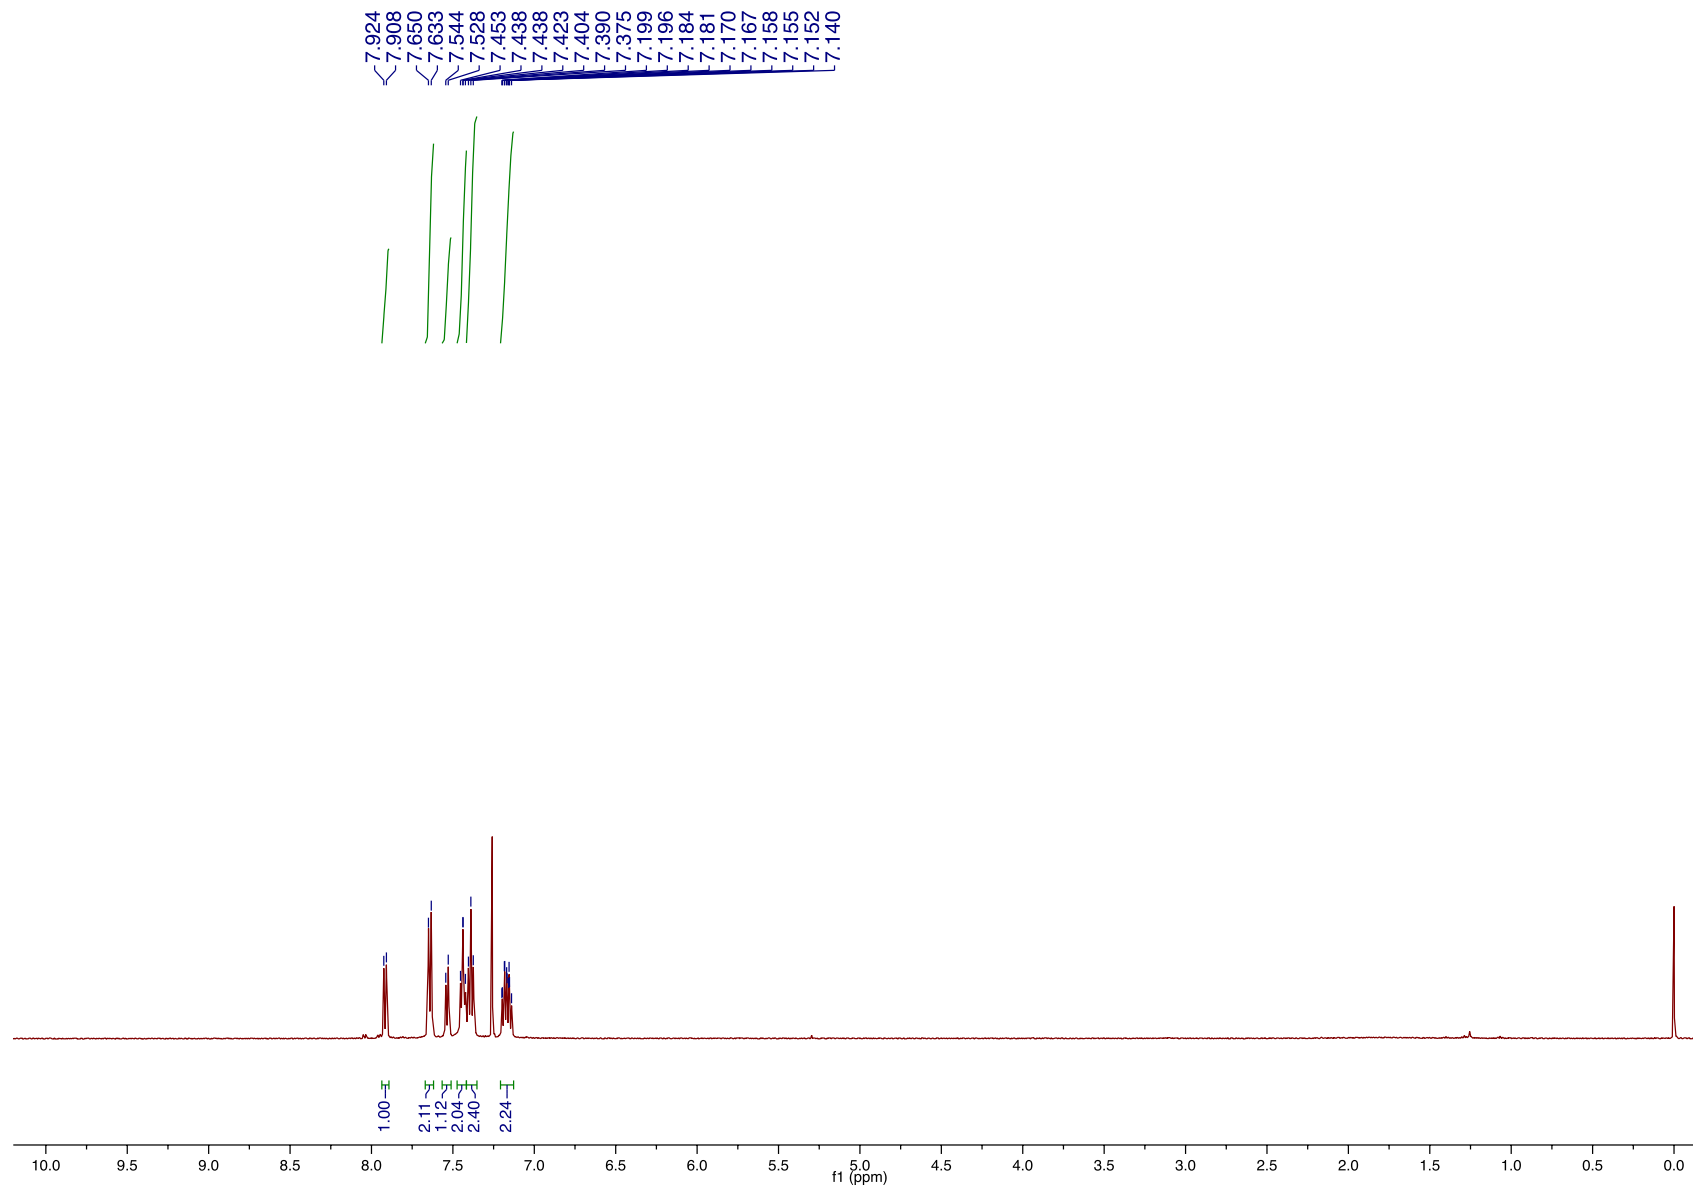

$^1\text{H}$  NMR (500 MHz,  $\text{CDCl}_3$ )

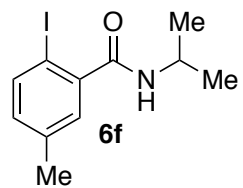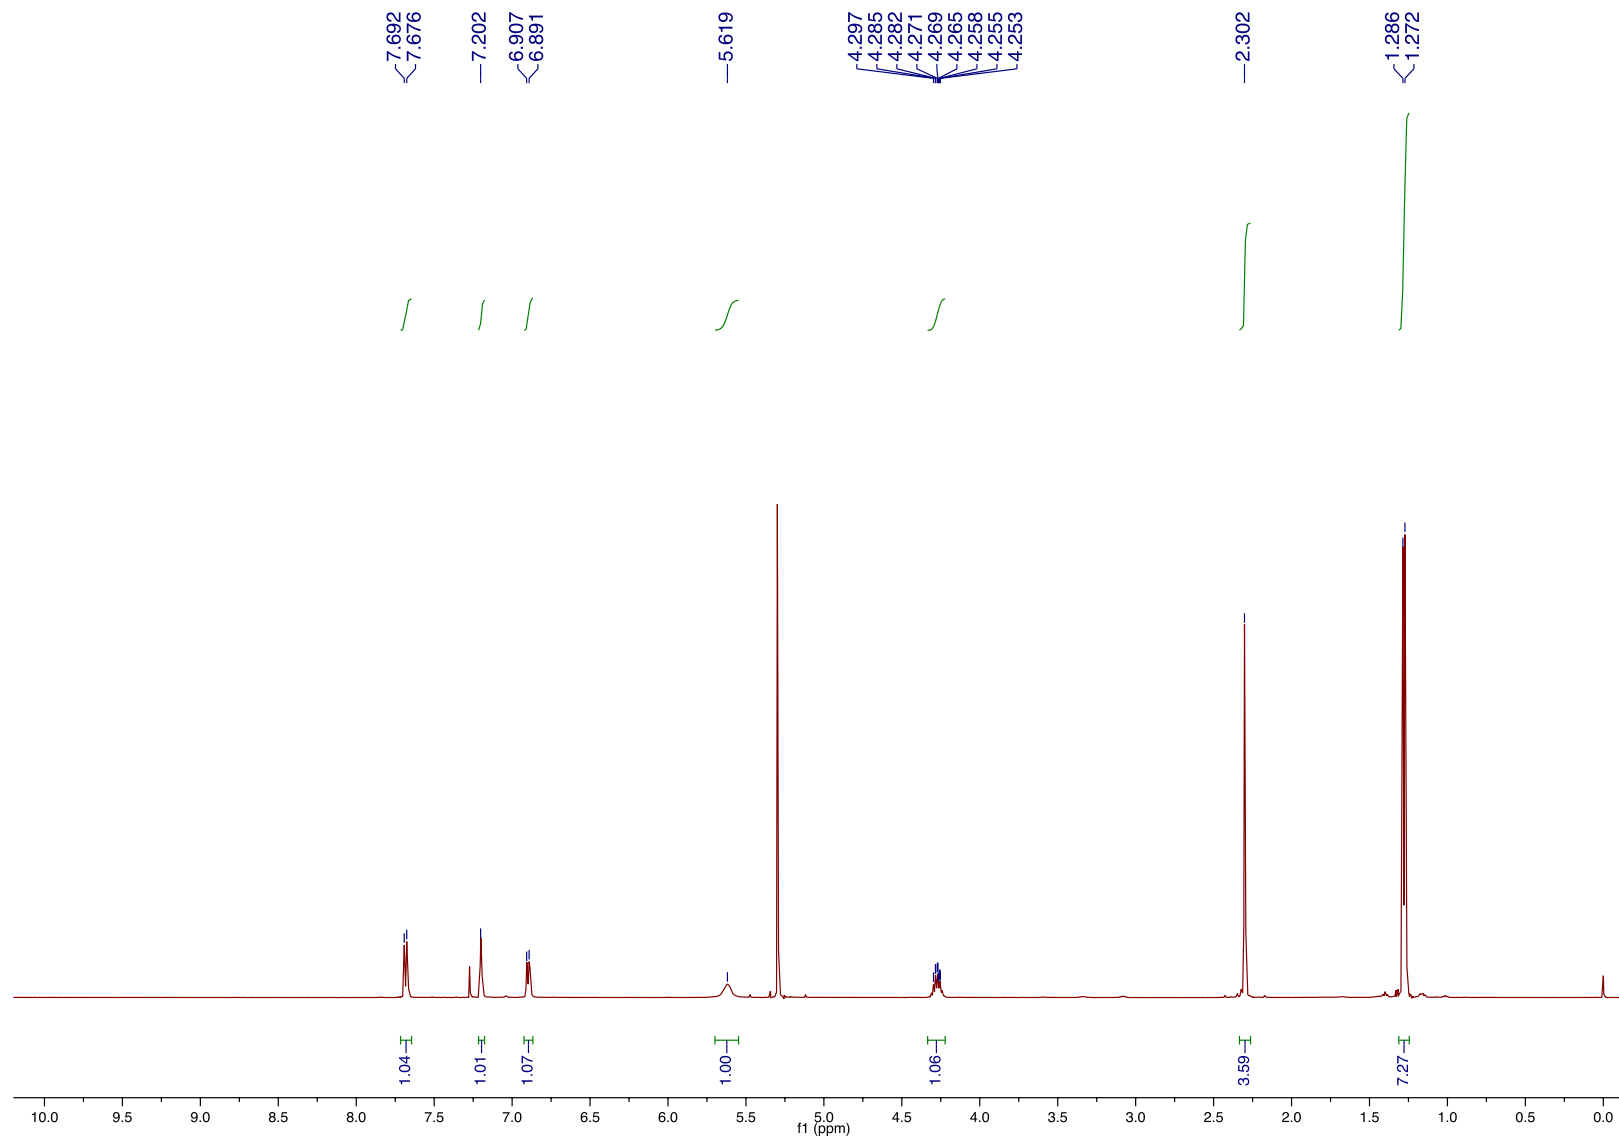



$^1\text{H}$  NMR (500 MHz,  $\text{CDCl}_3$ )

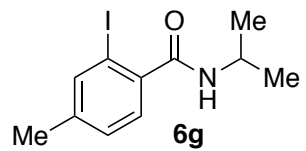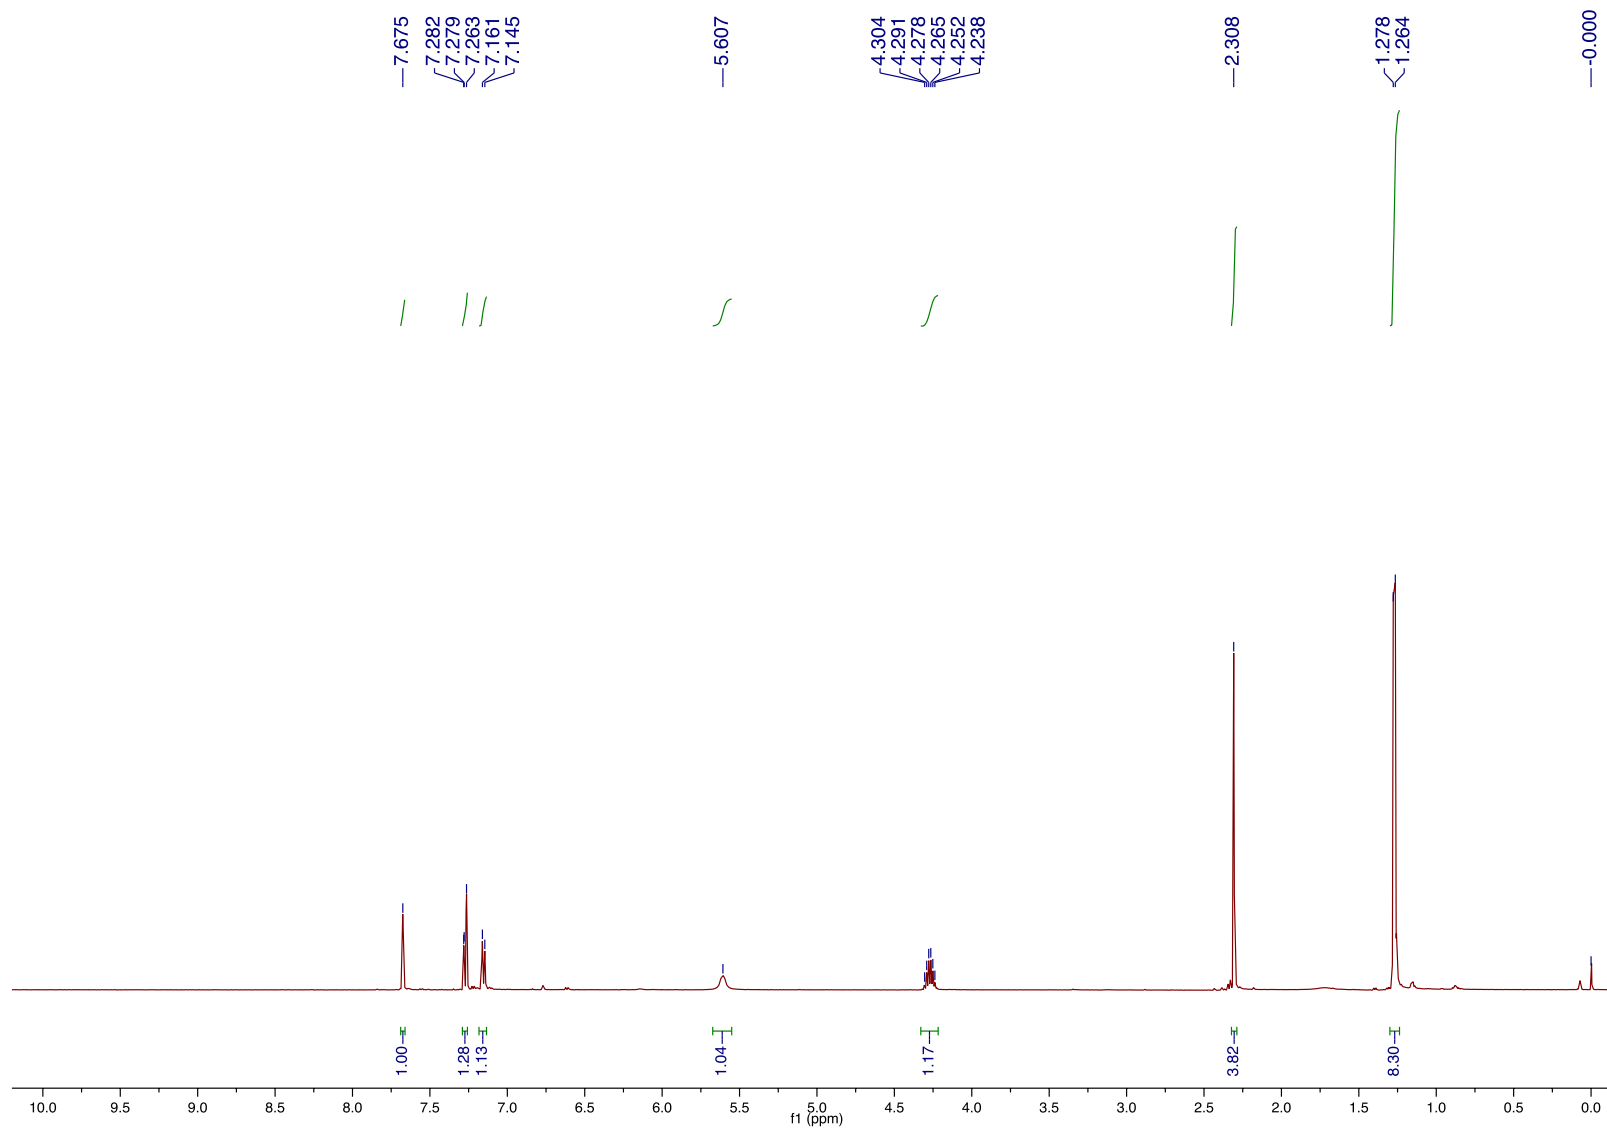

$^{13}\text{C}$  NMR (125 MHz,  $\text{CDCl}_3$ )

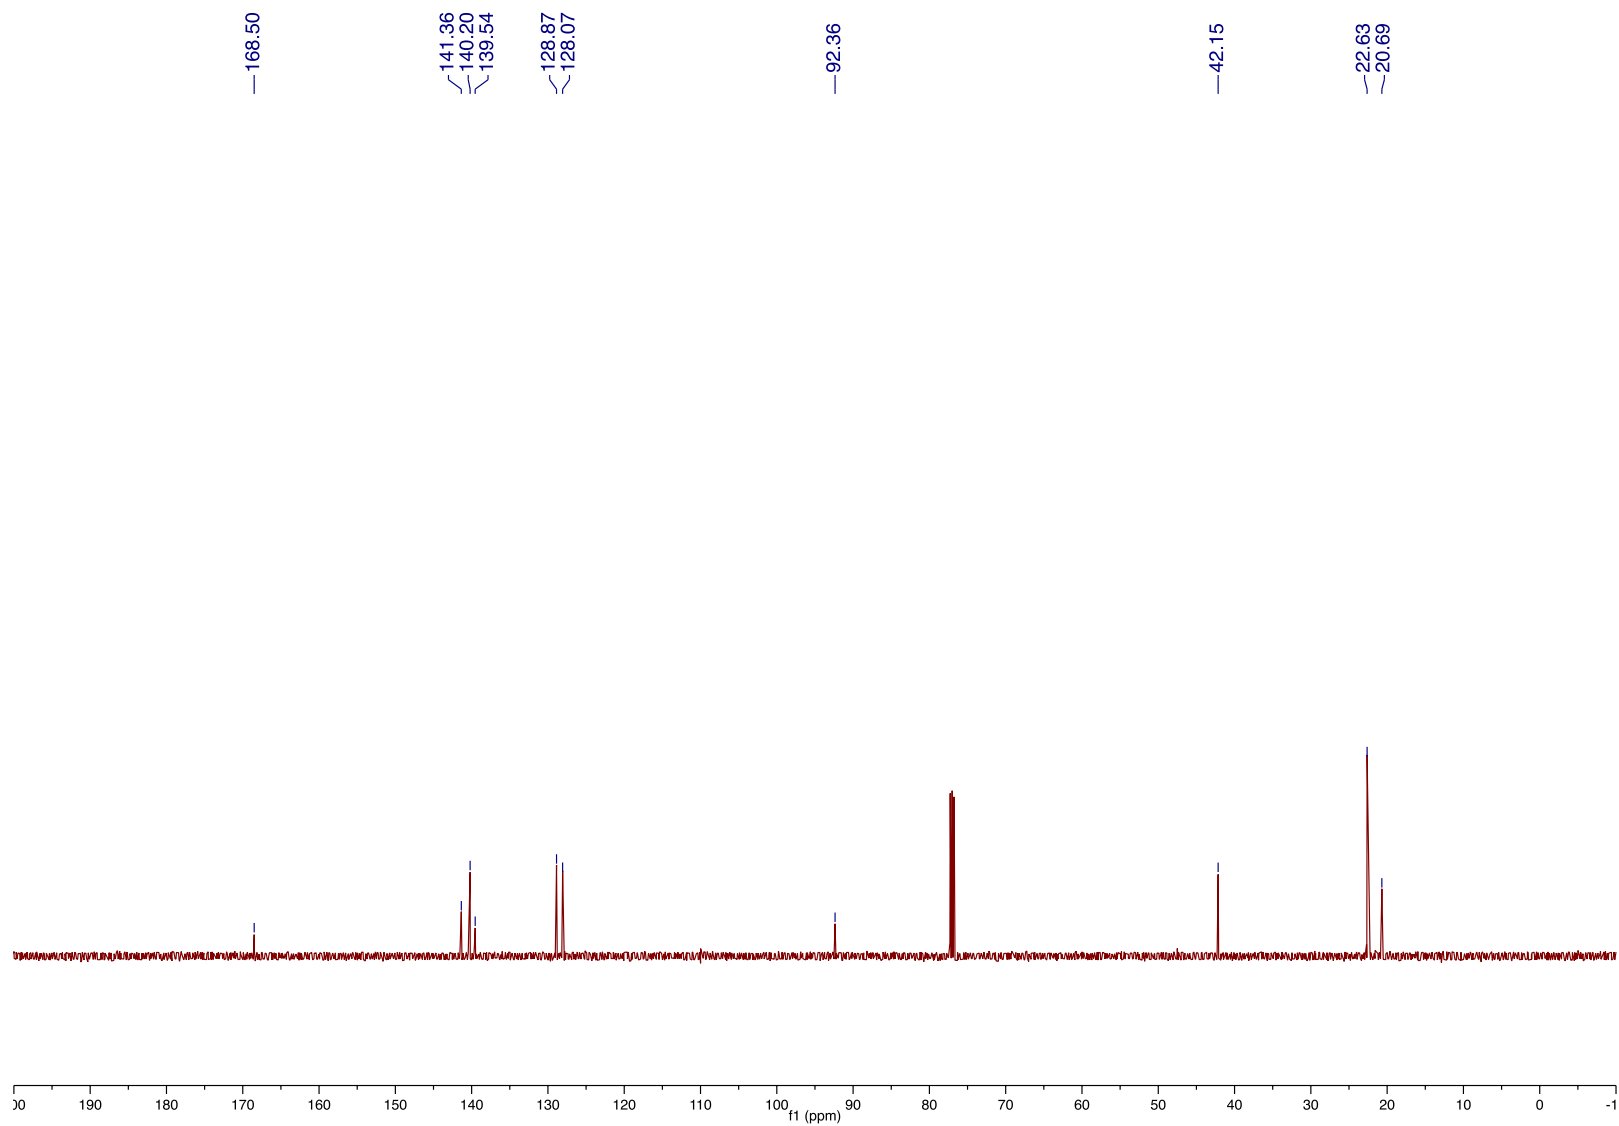

$^1\text{H}$  NMR (500 MHz,  $\text{CDCl}_3$ )

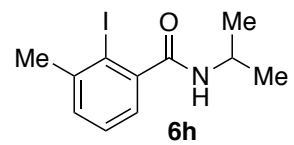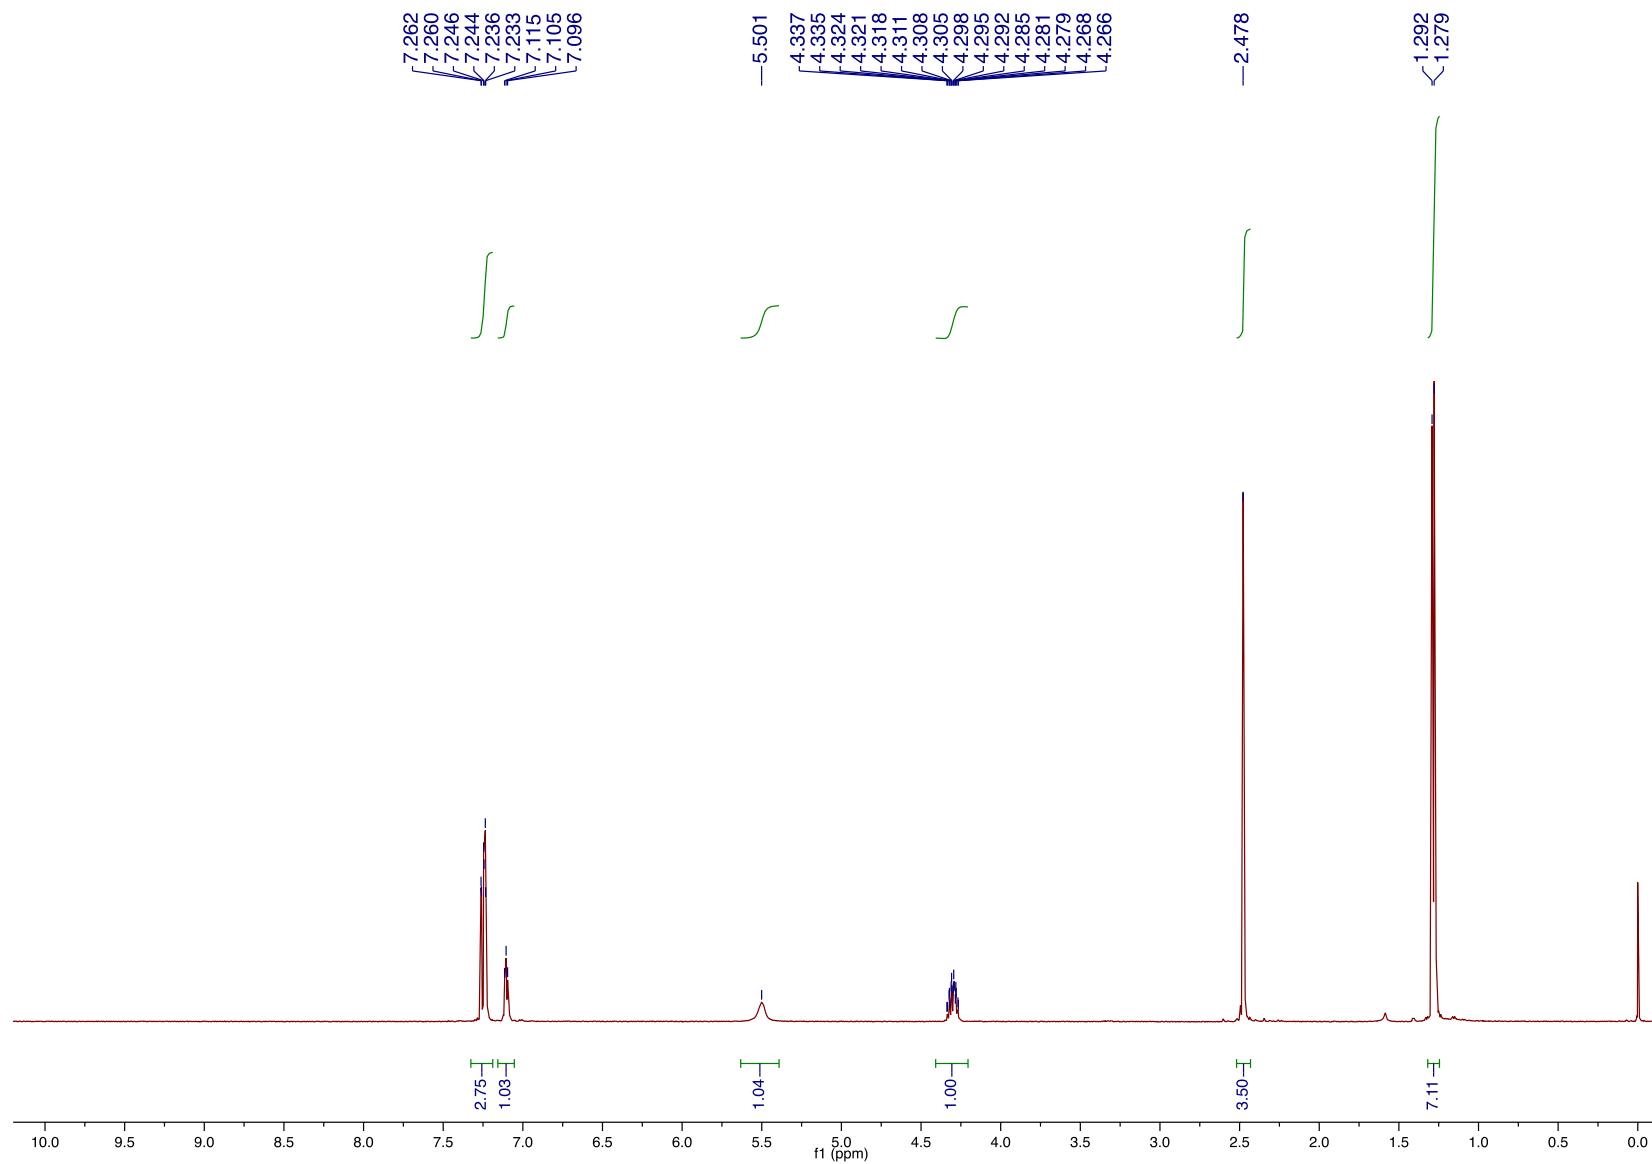

$^{13}\text{C}$  NMR (125 MHz,  $\text{CDCl}_3$ )

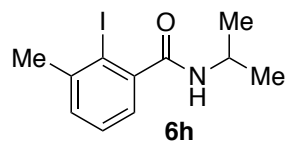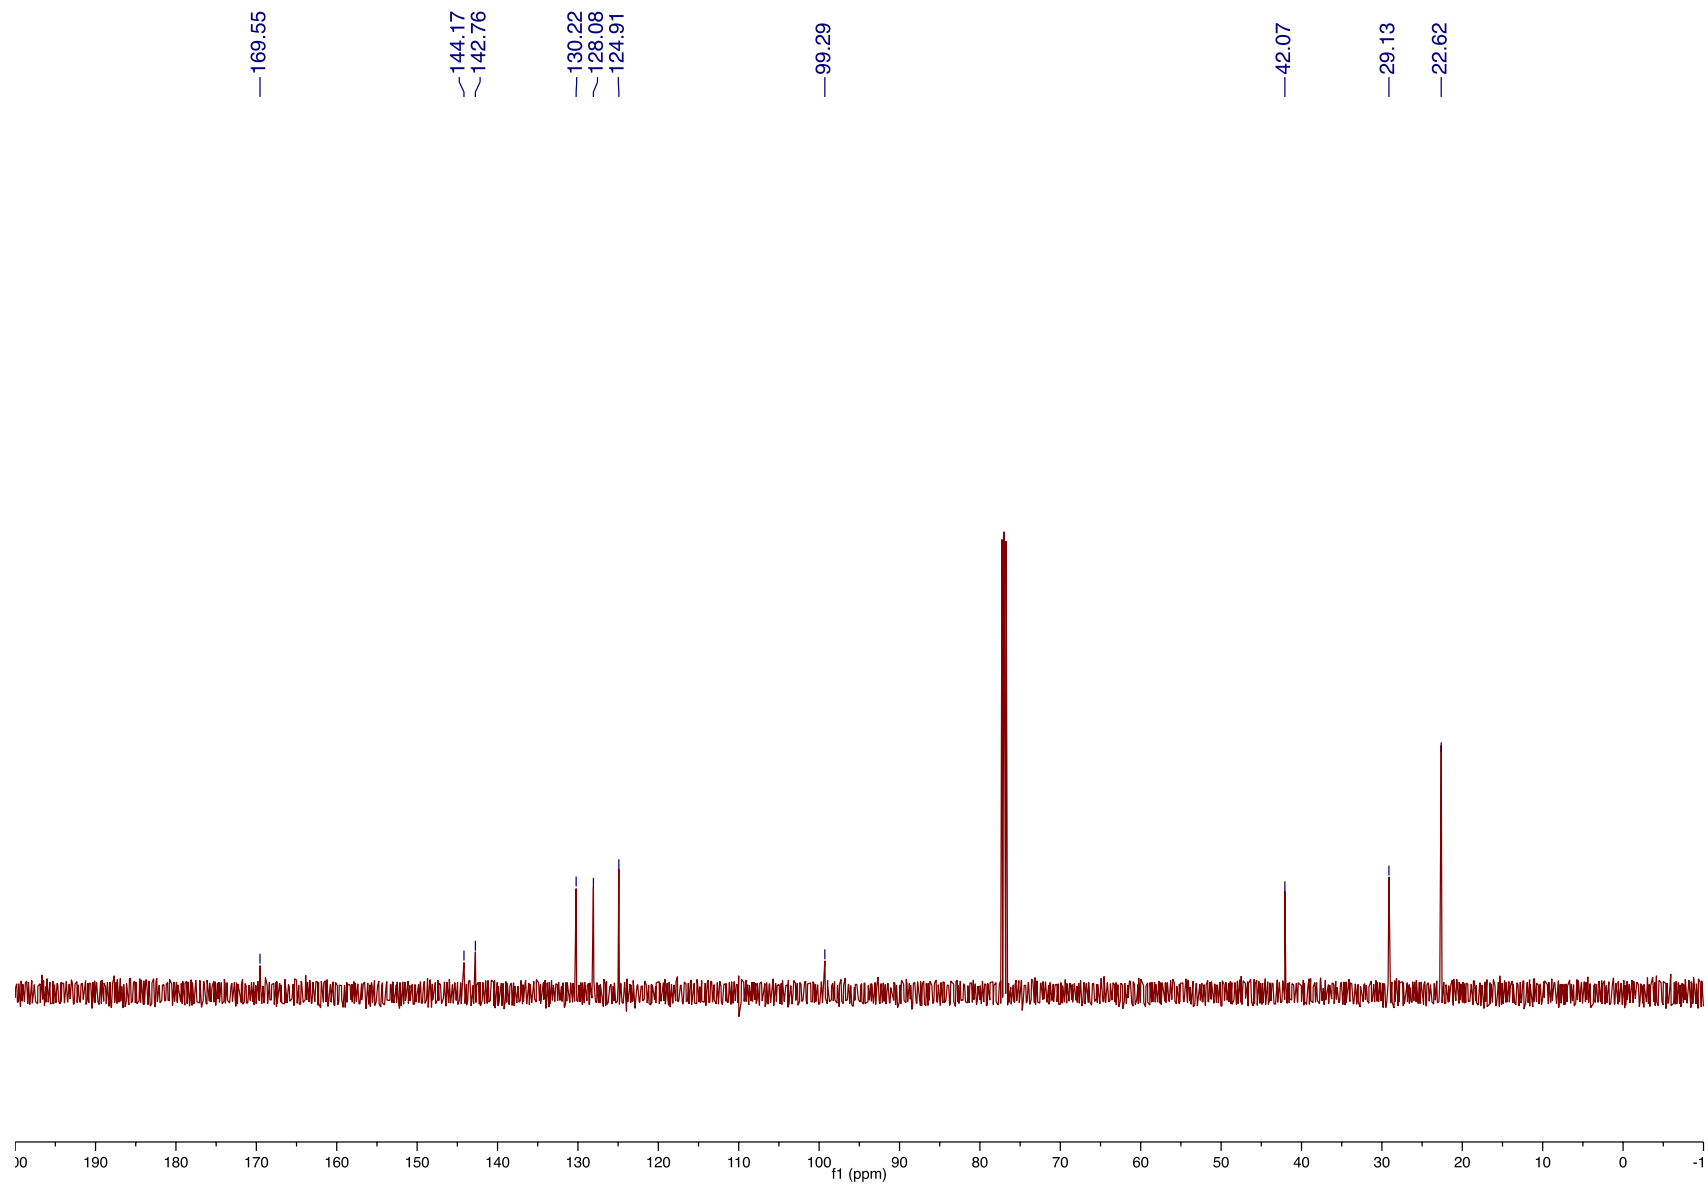

$^1\text{H}$  NMR (500 MHz,  $\text{CDCl}_3$ )

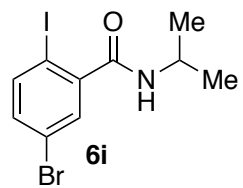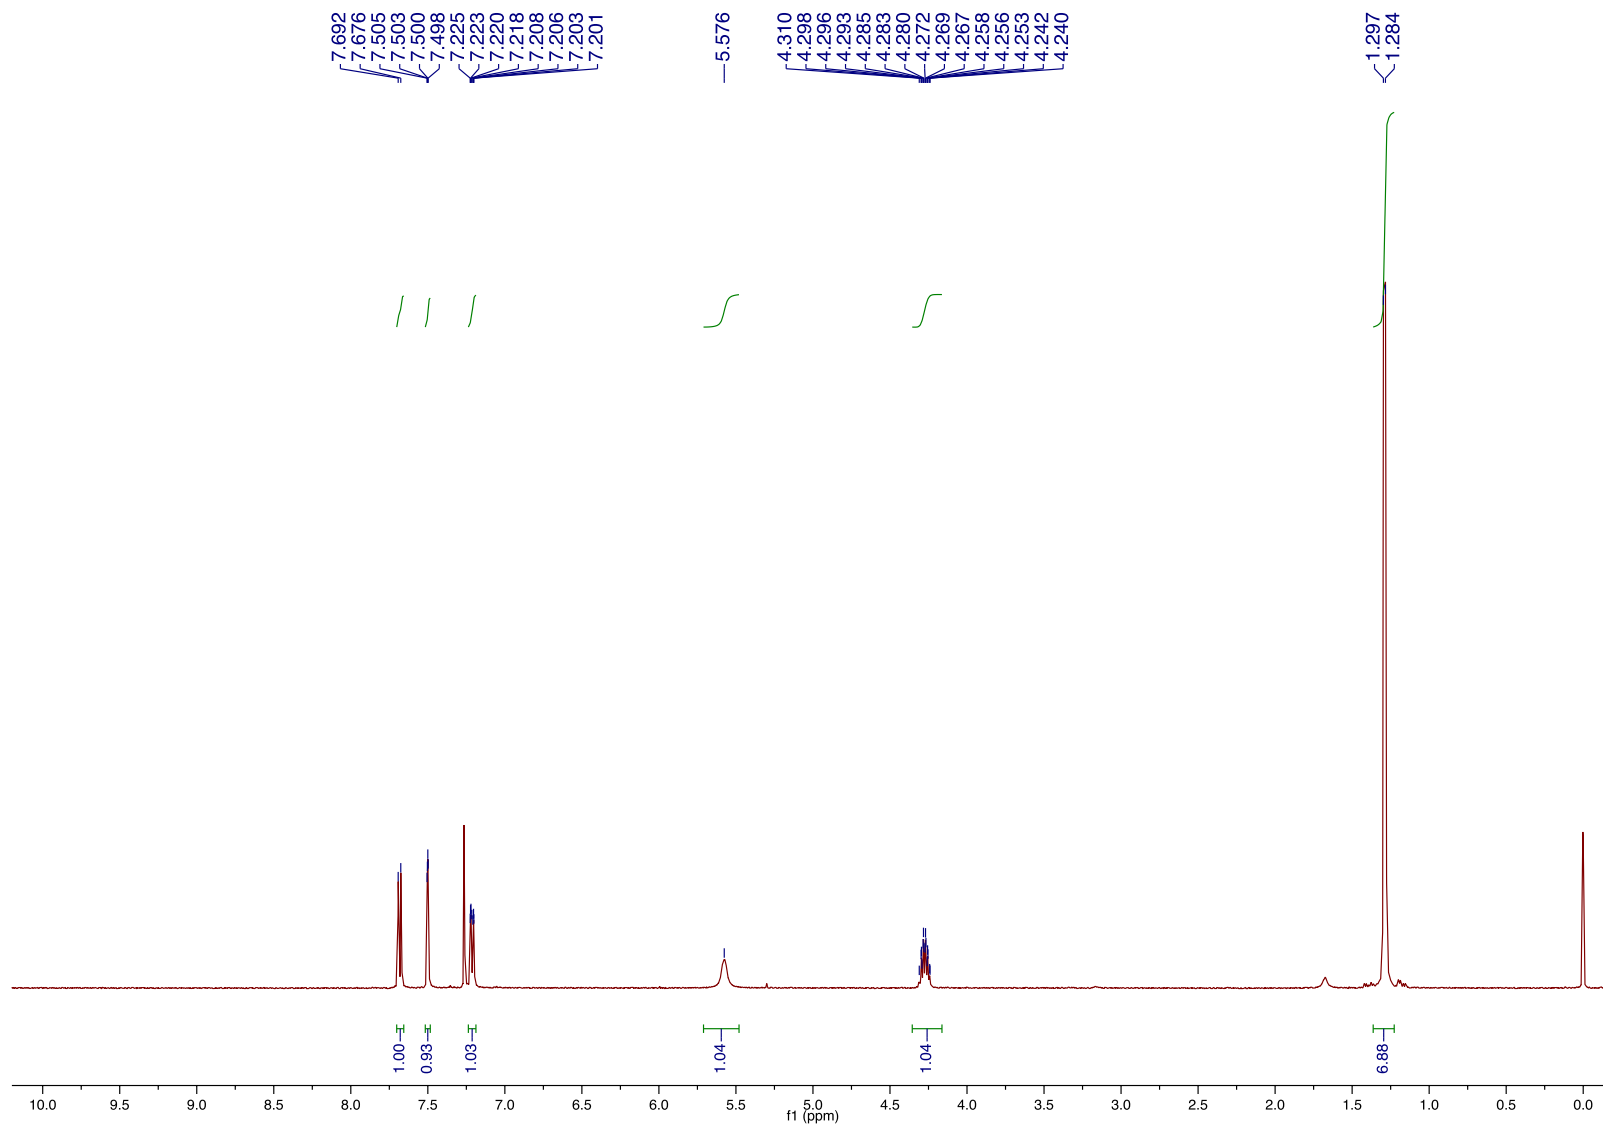

$^{13}\text{C}$  NMR (125 MHz,  $\text{CDCl}_3$ )

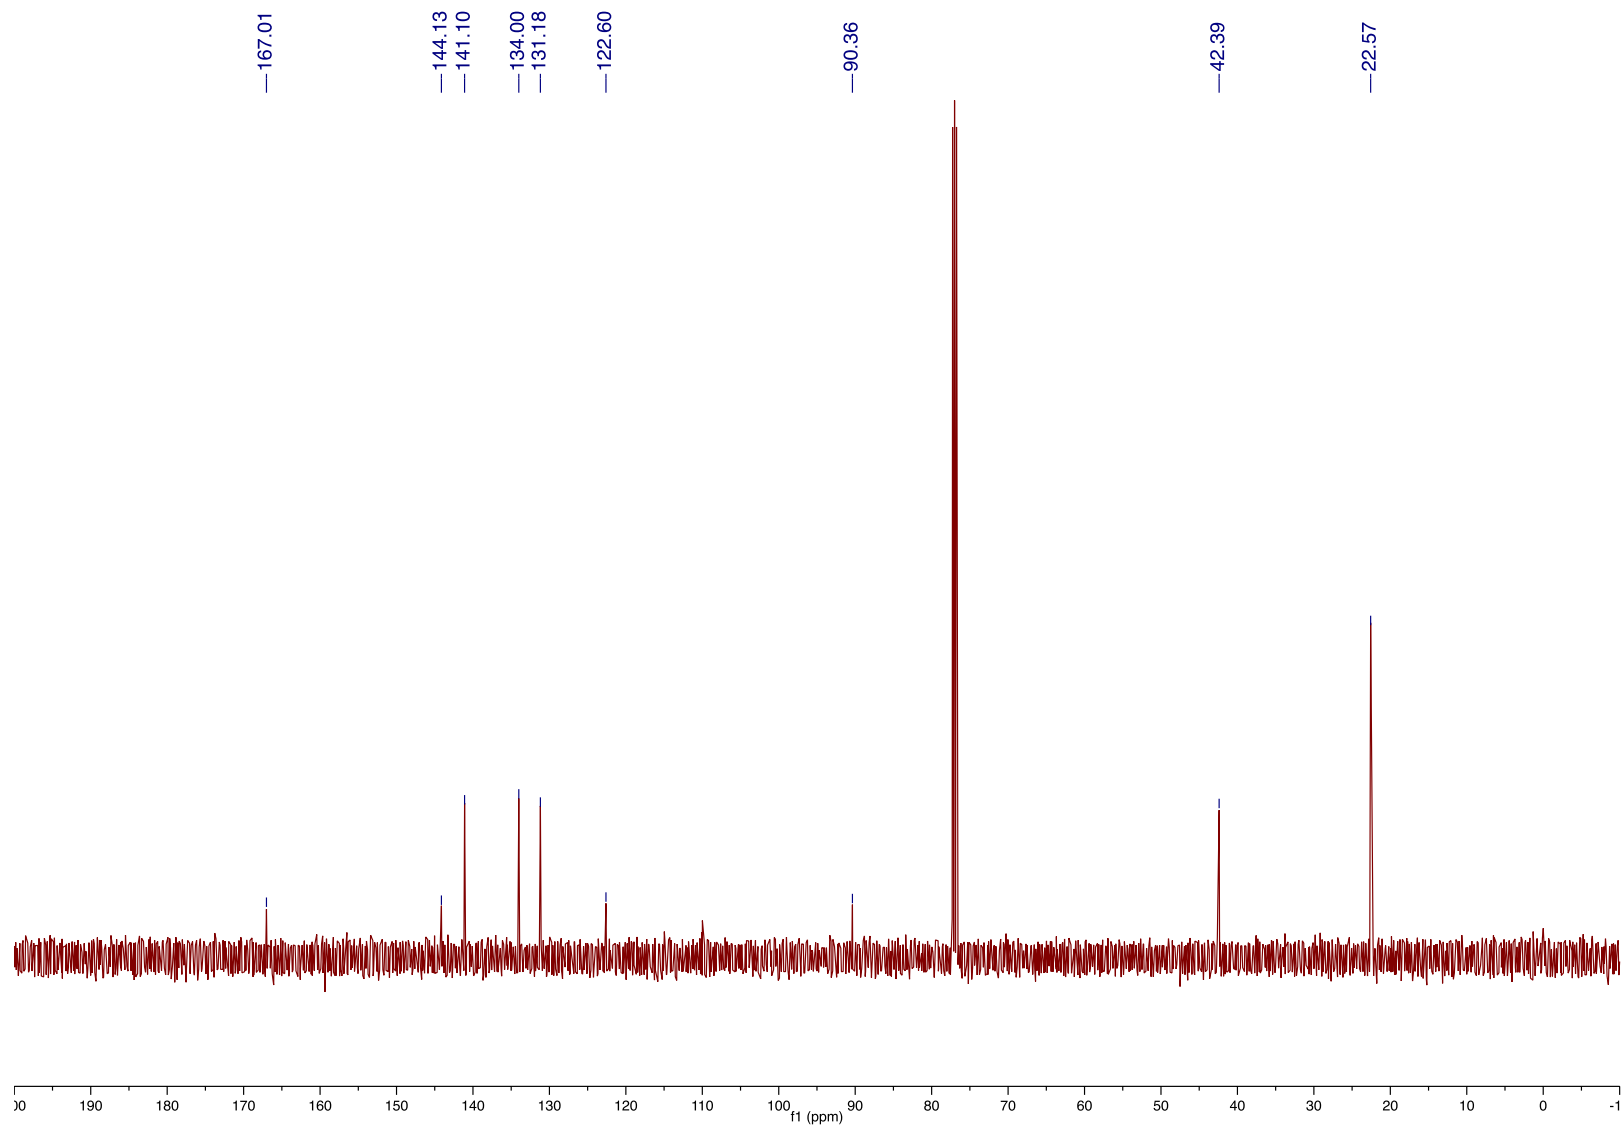

$^1\text{H}$  NMR (500 MHz,  $\text{CDCl}_3$ )

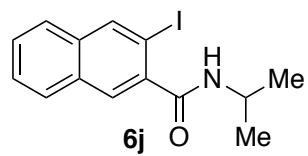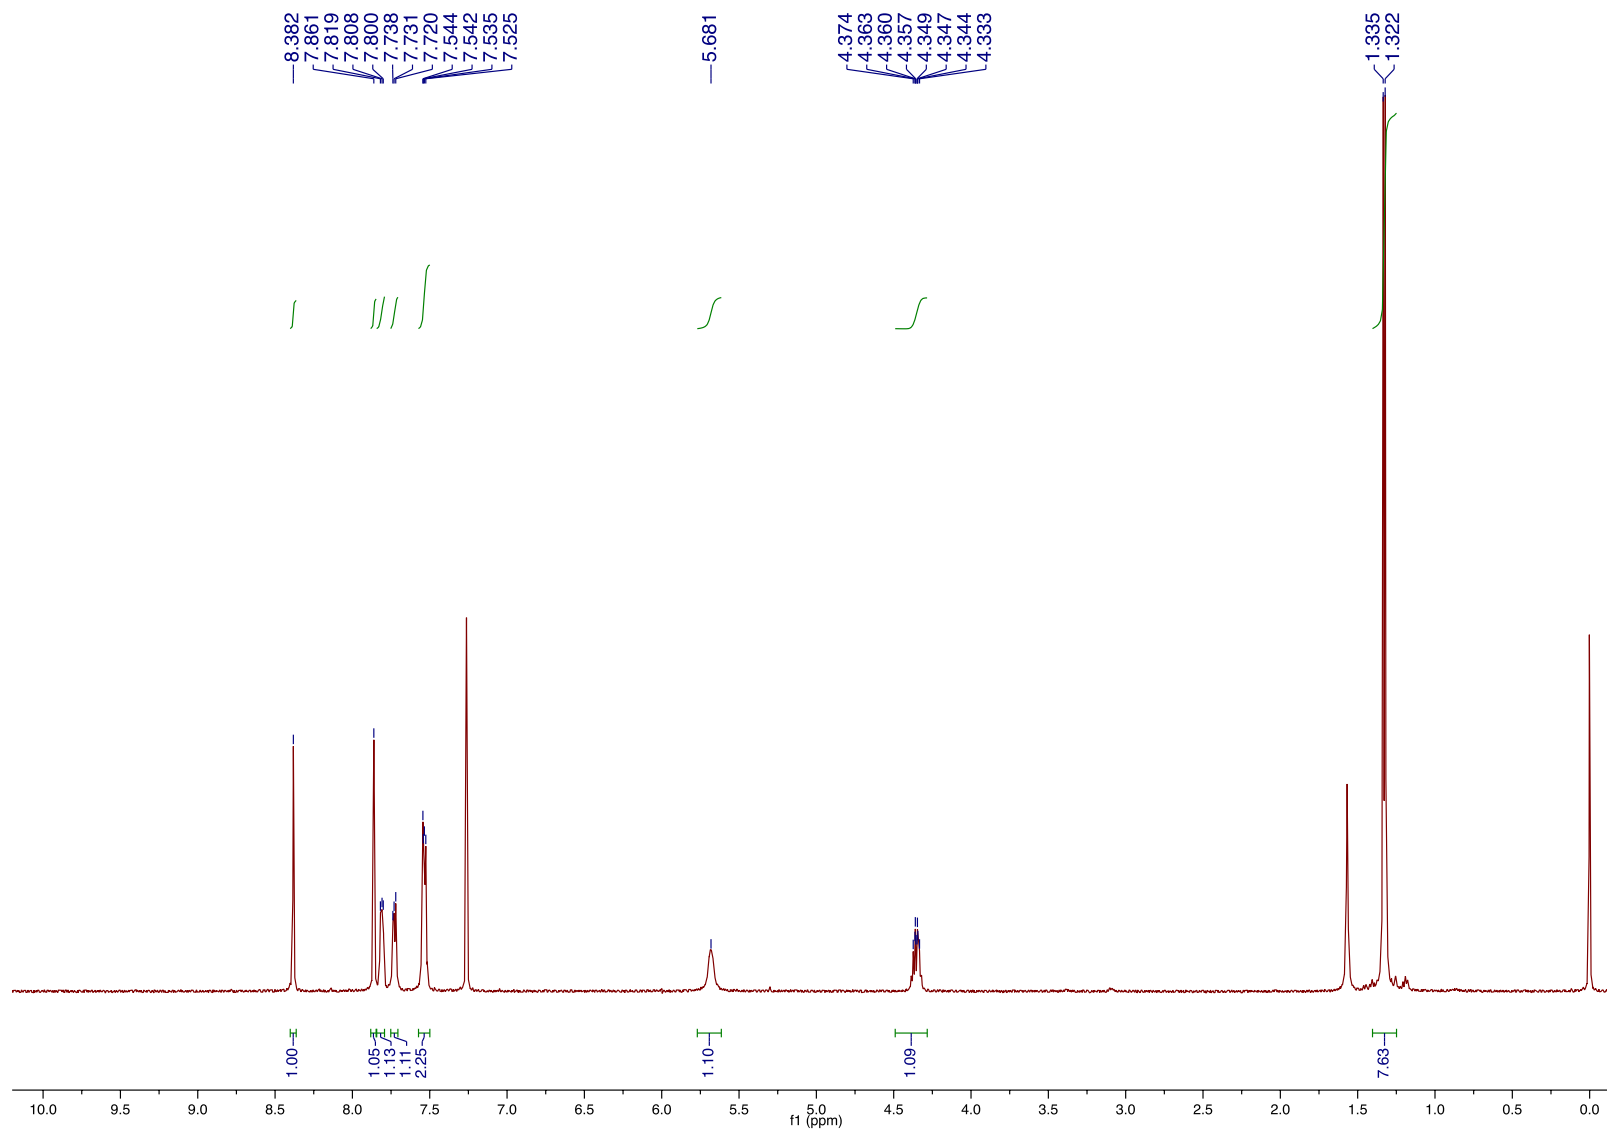

$^{13}\text{C}$  NMR (125 MHz,  $\text{CDCl}_3$ )

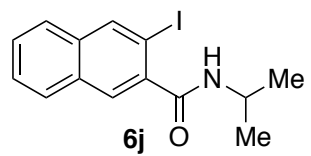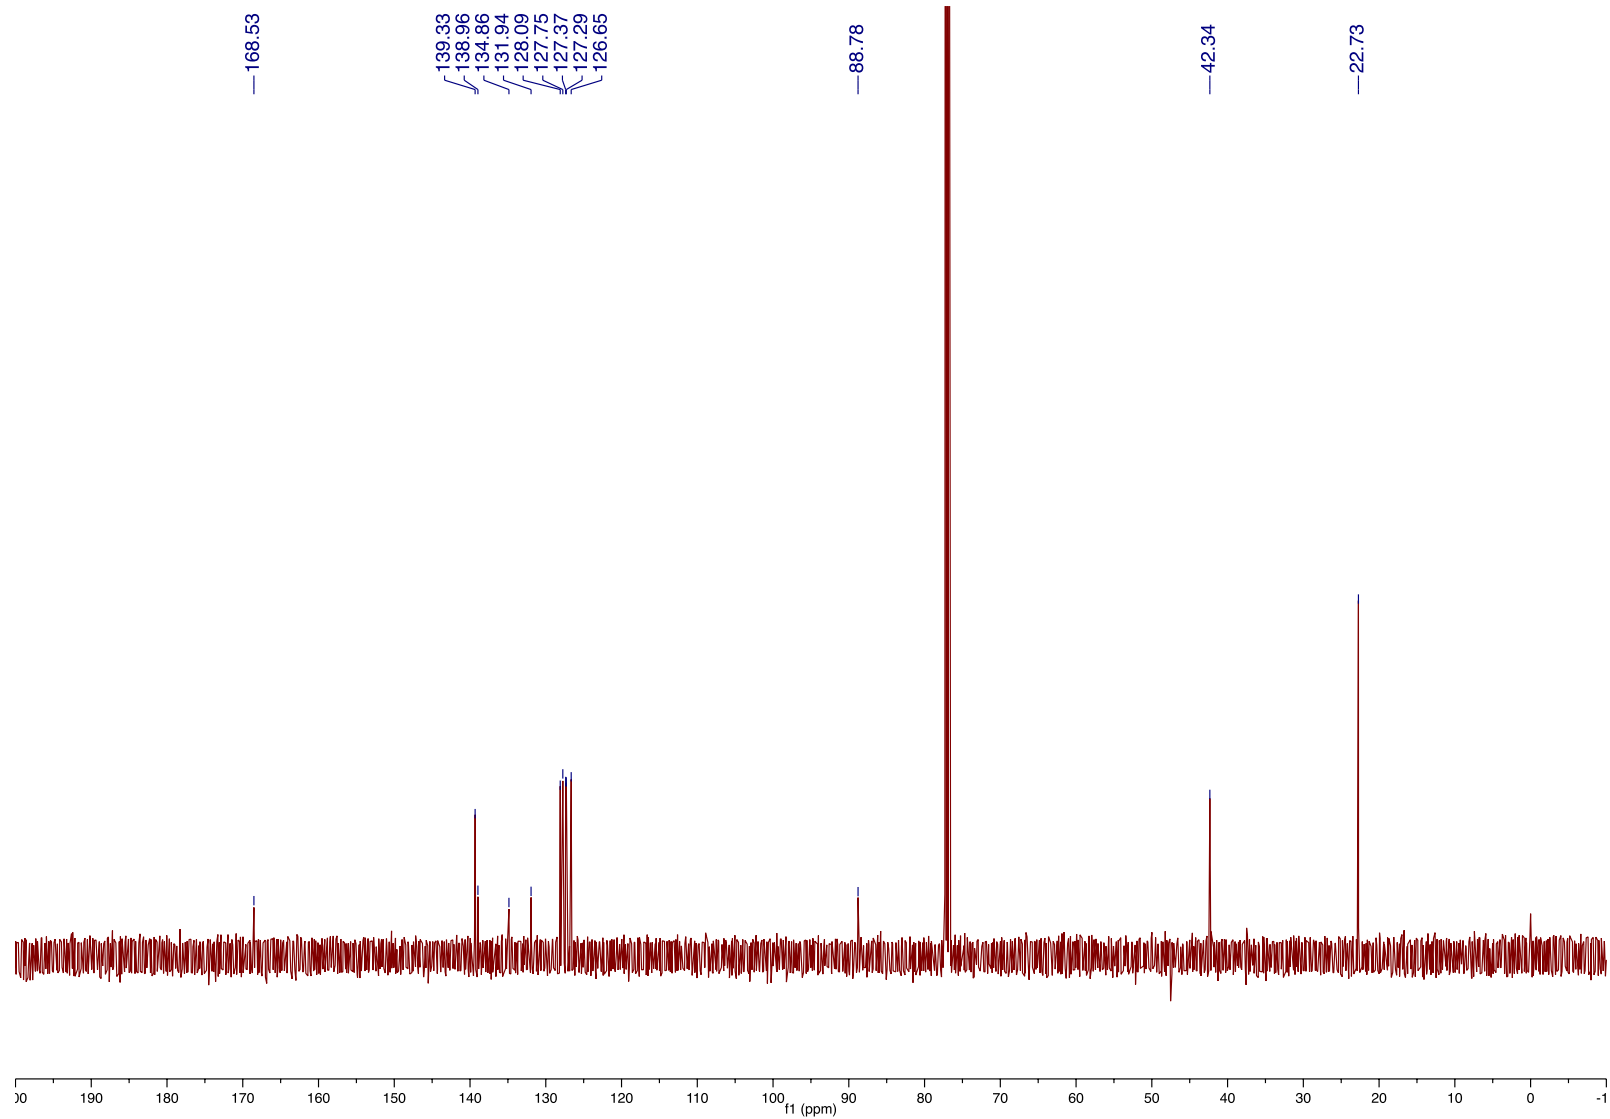



<sup>1</sup>H NMR (500 MHz, CDCl<sub>3</sub>)

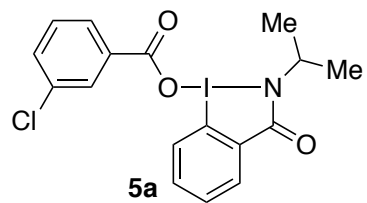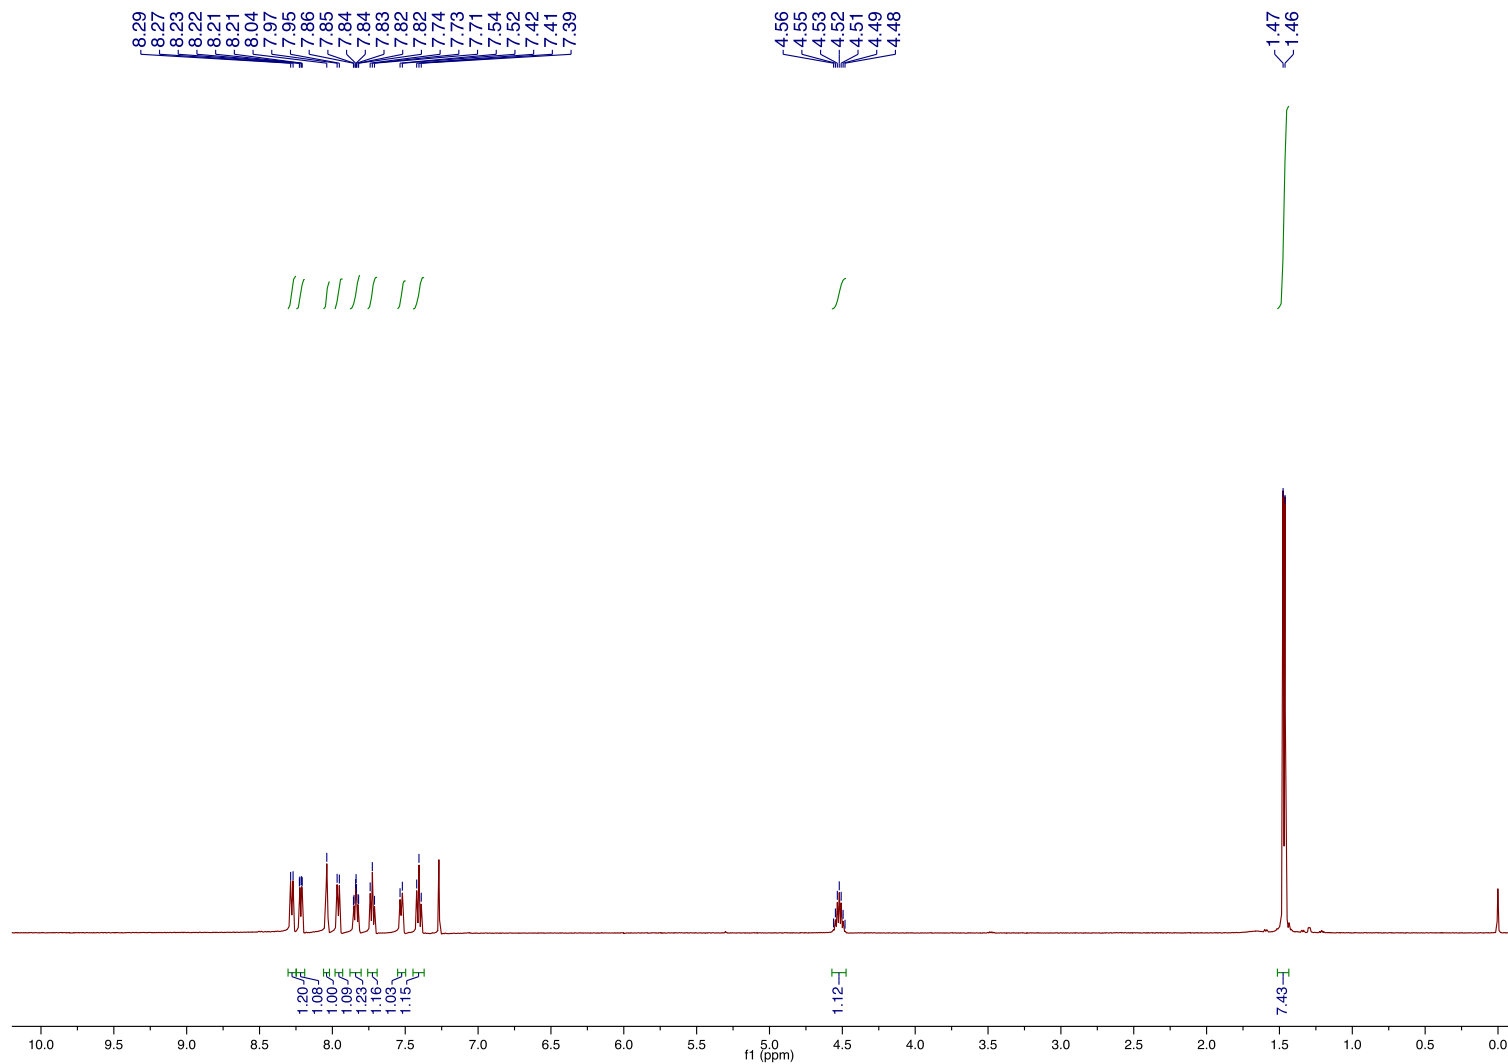

$^{13}\text{C}$  NMR (125 MHz,  $\text{CDCl}_3$ )

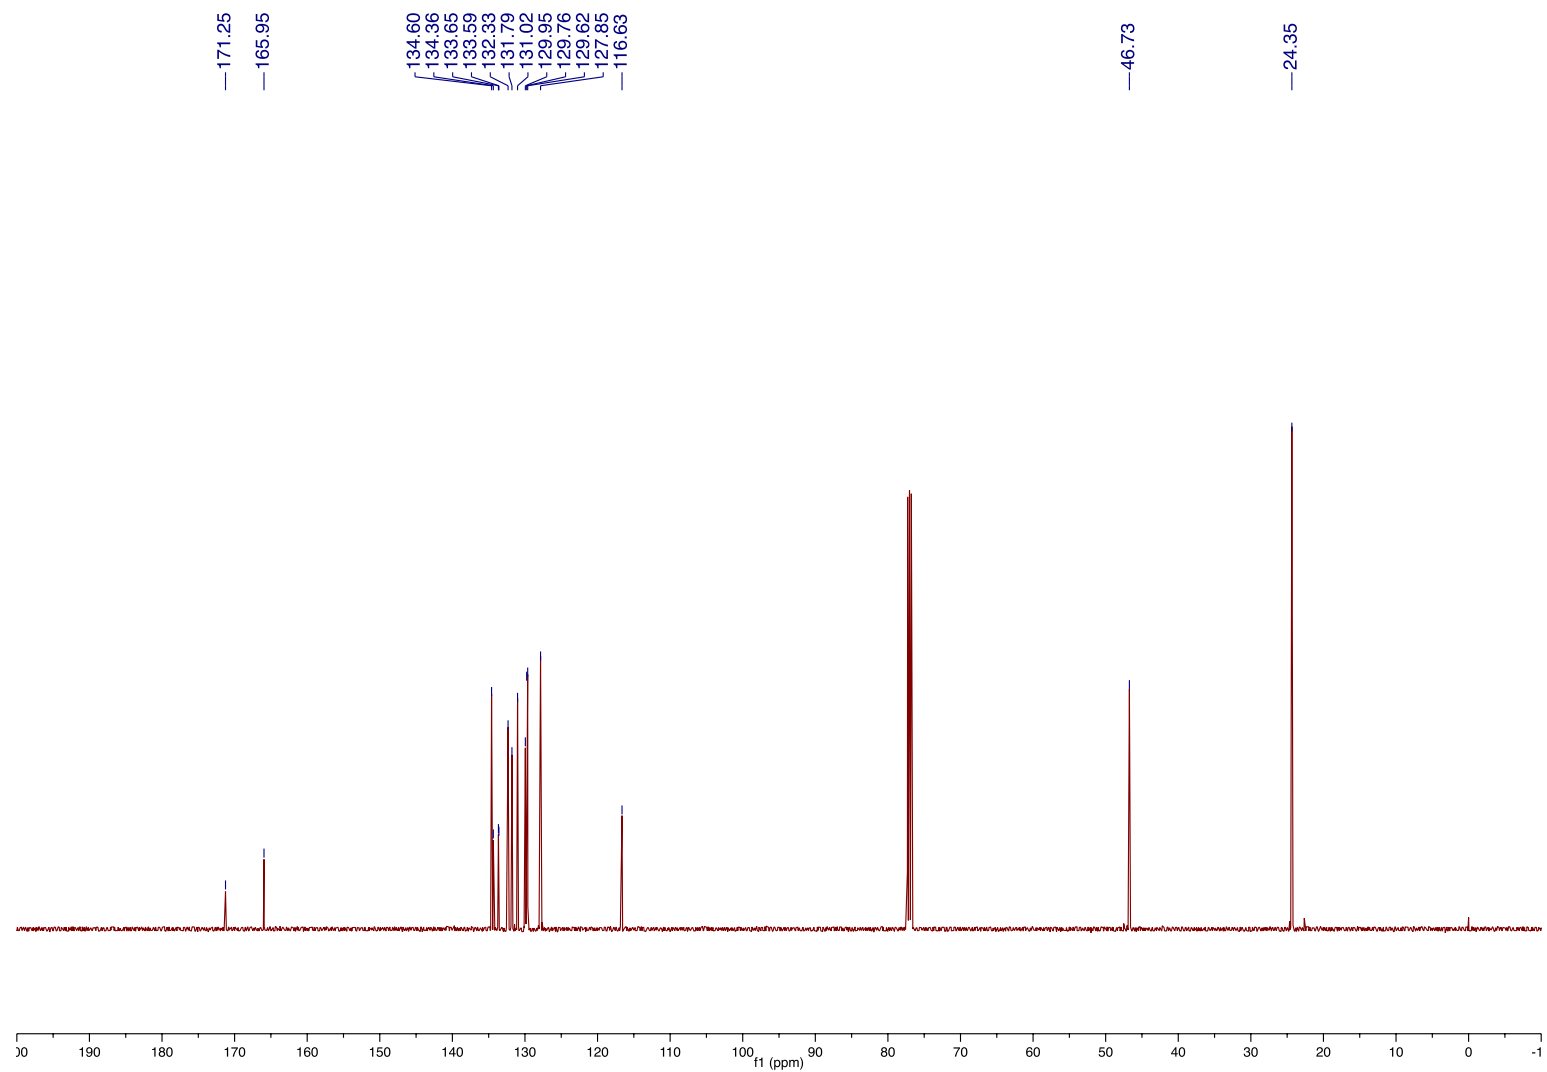

$^1\text{H}$  NMR (500 MHz,  $\text{CDCl}_3$ )

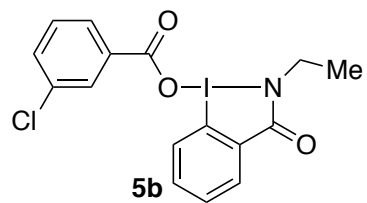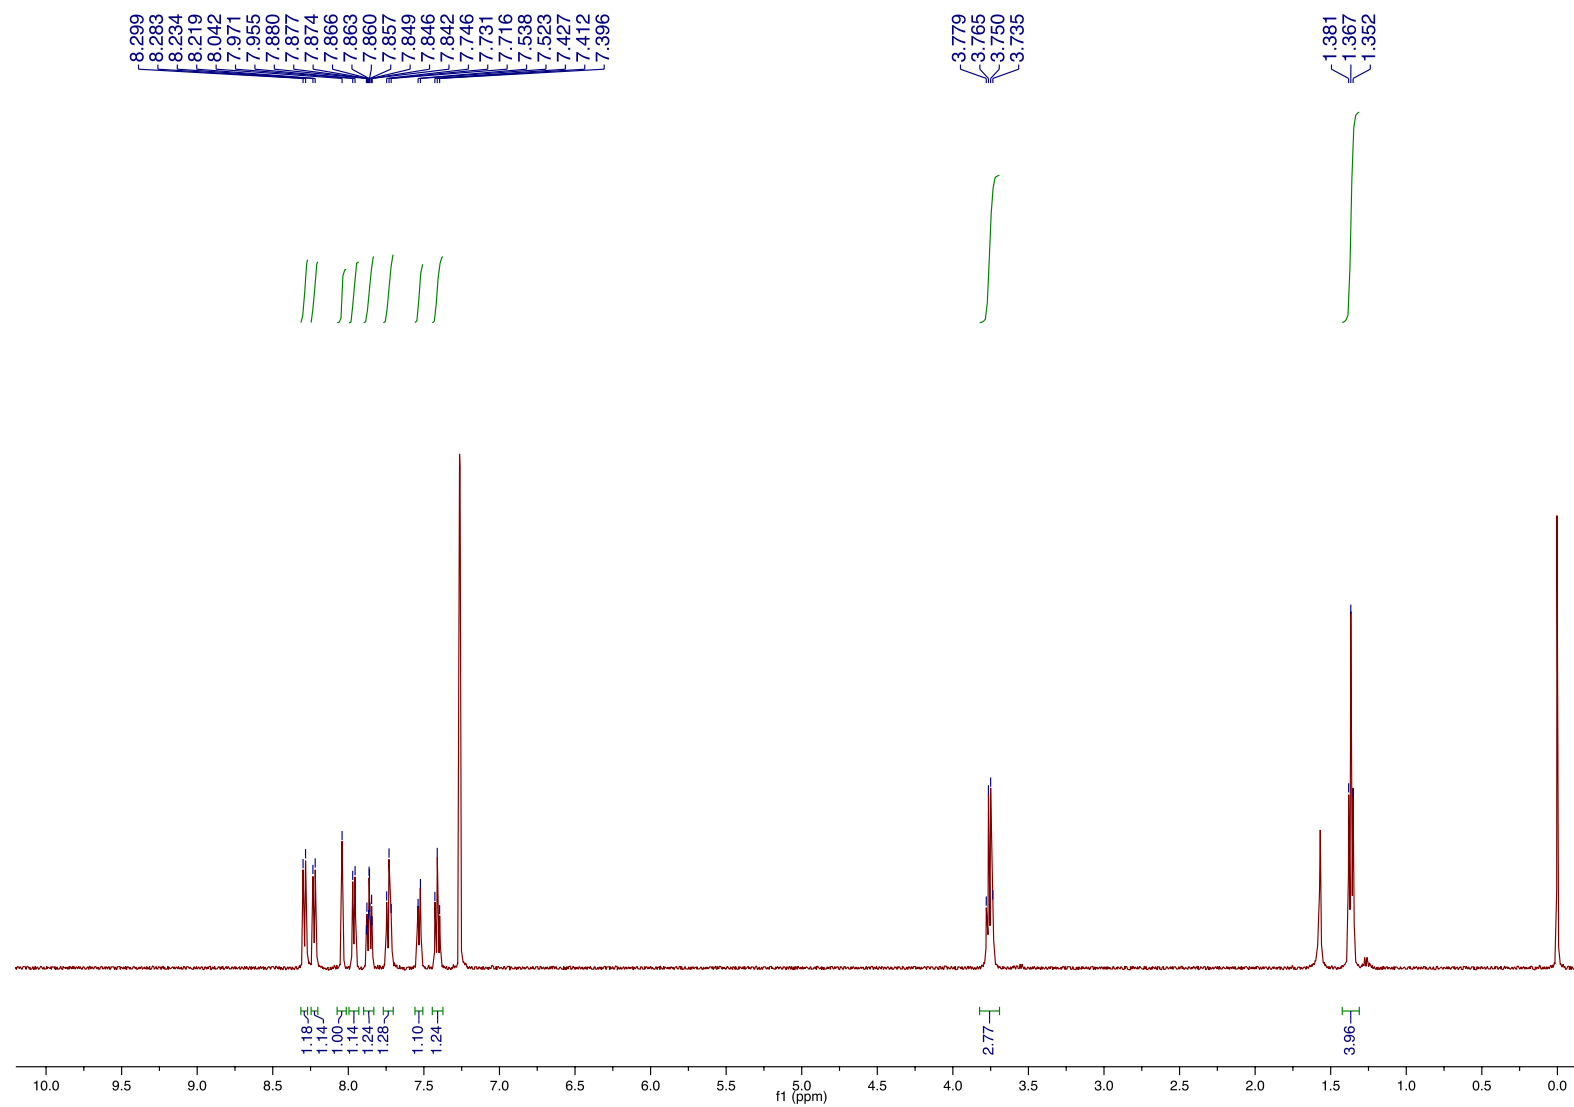

$^{13}\text{C}$  NMR (125 MHz,  $\text{CDCl}_3$ )

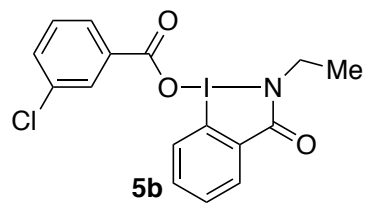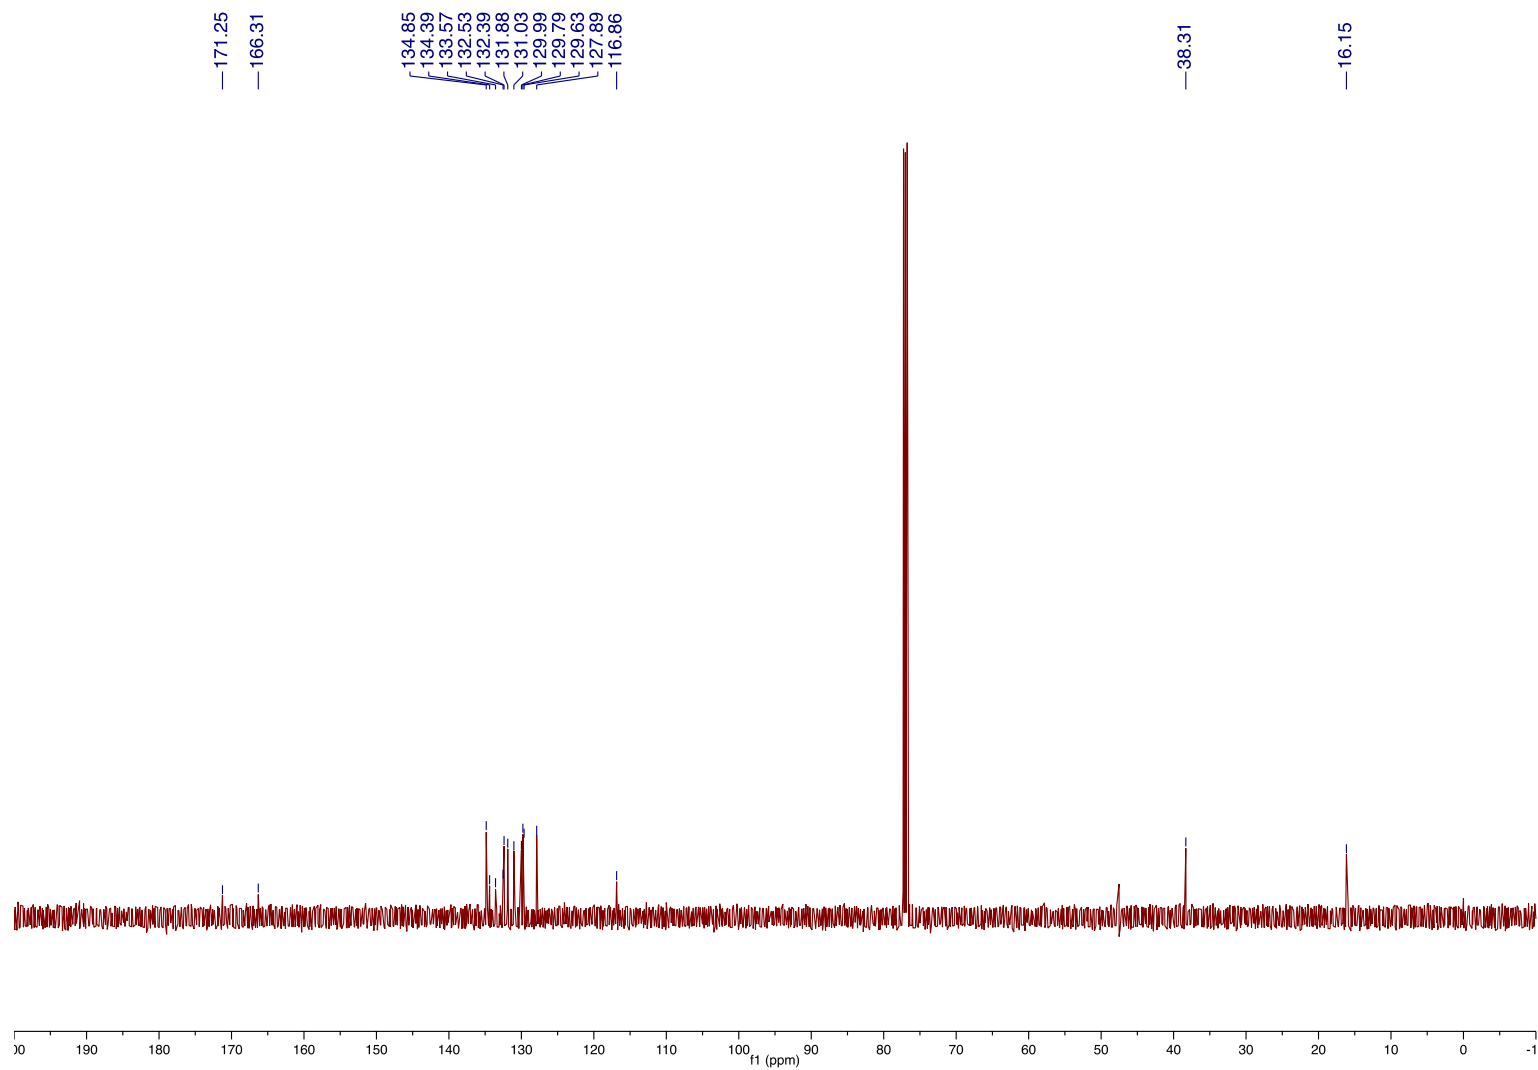

$^1\text{H}$  NMR (500 MHz,  $\text{CDCl}_3$ )

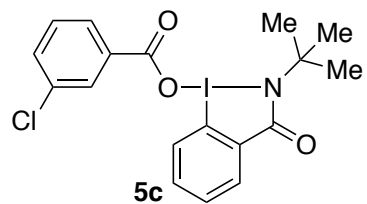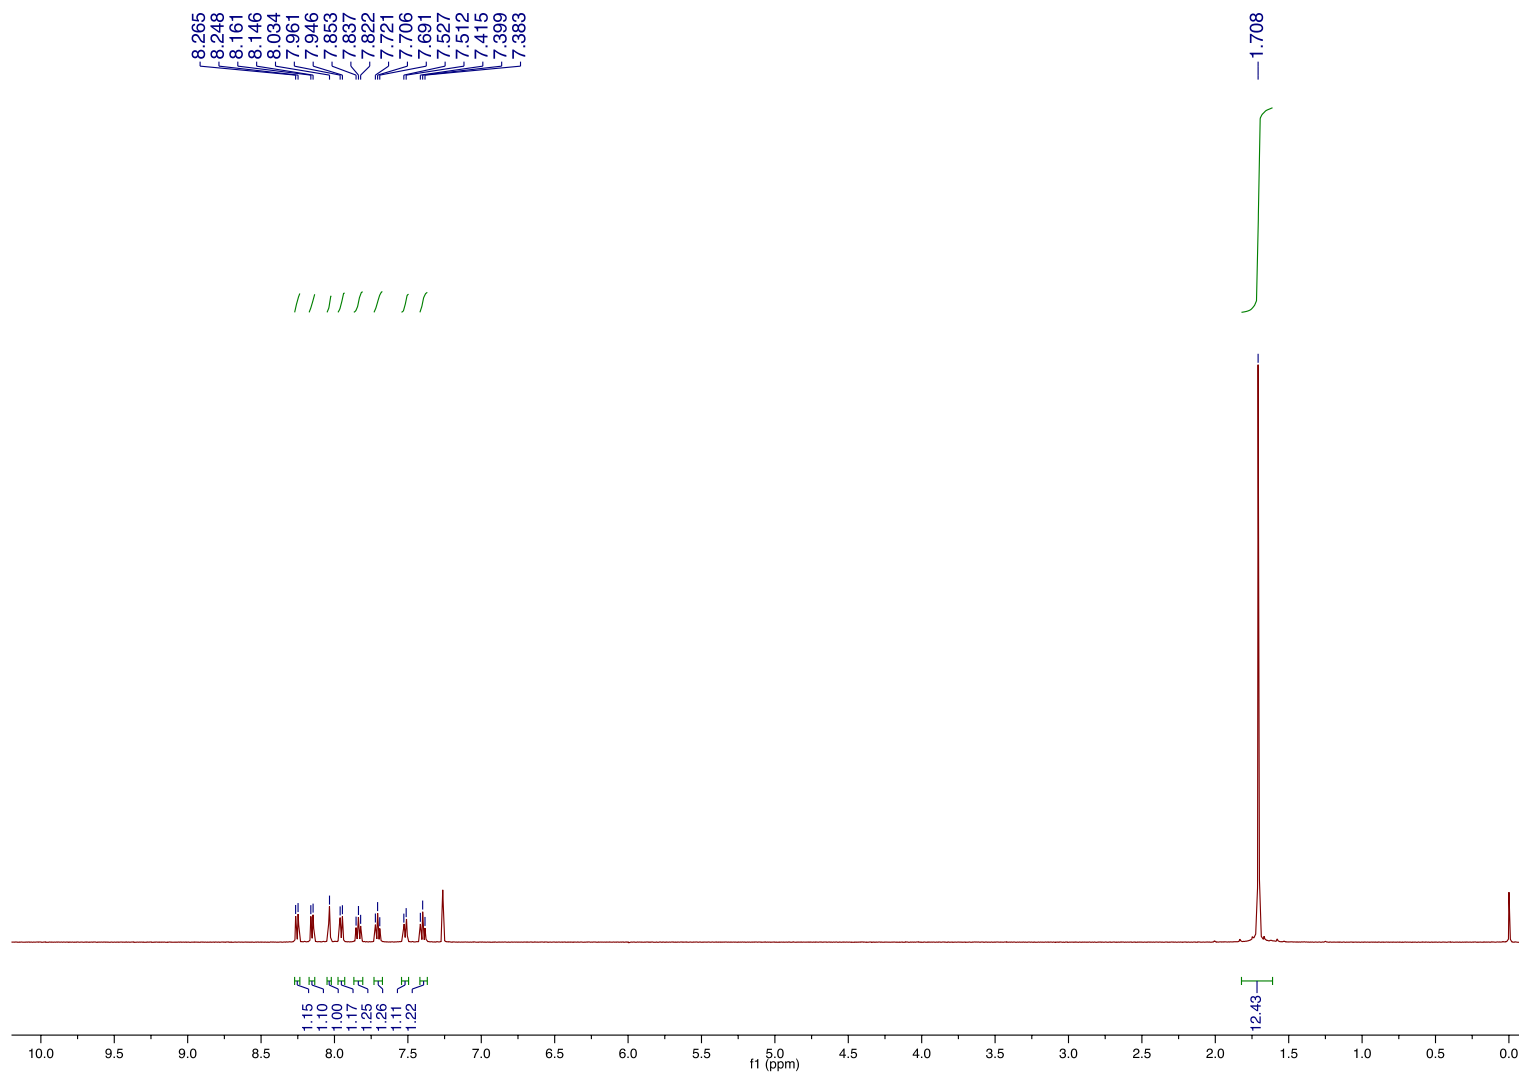

$^{13}\text{C}$  NMR (125 MHz,  $\text{CDCl}_3$ )

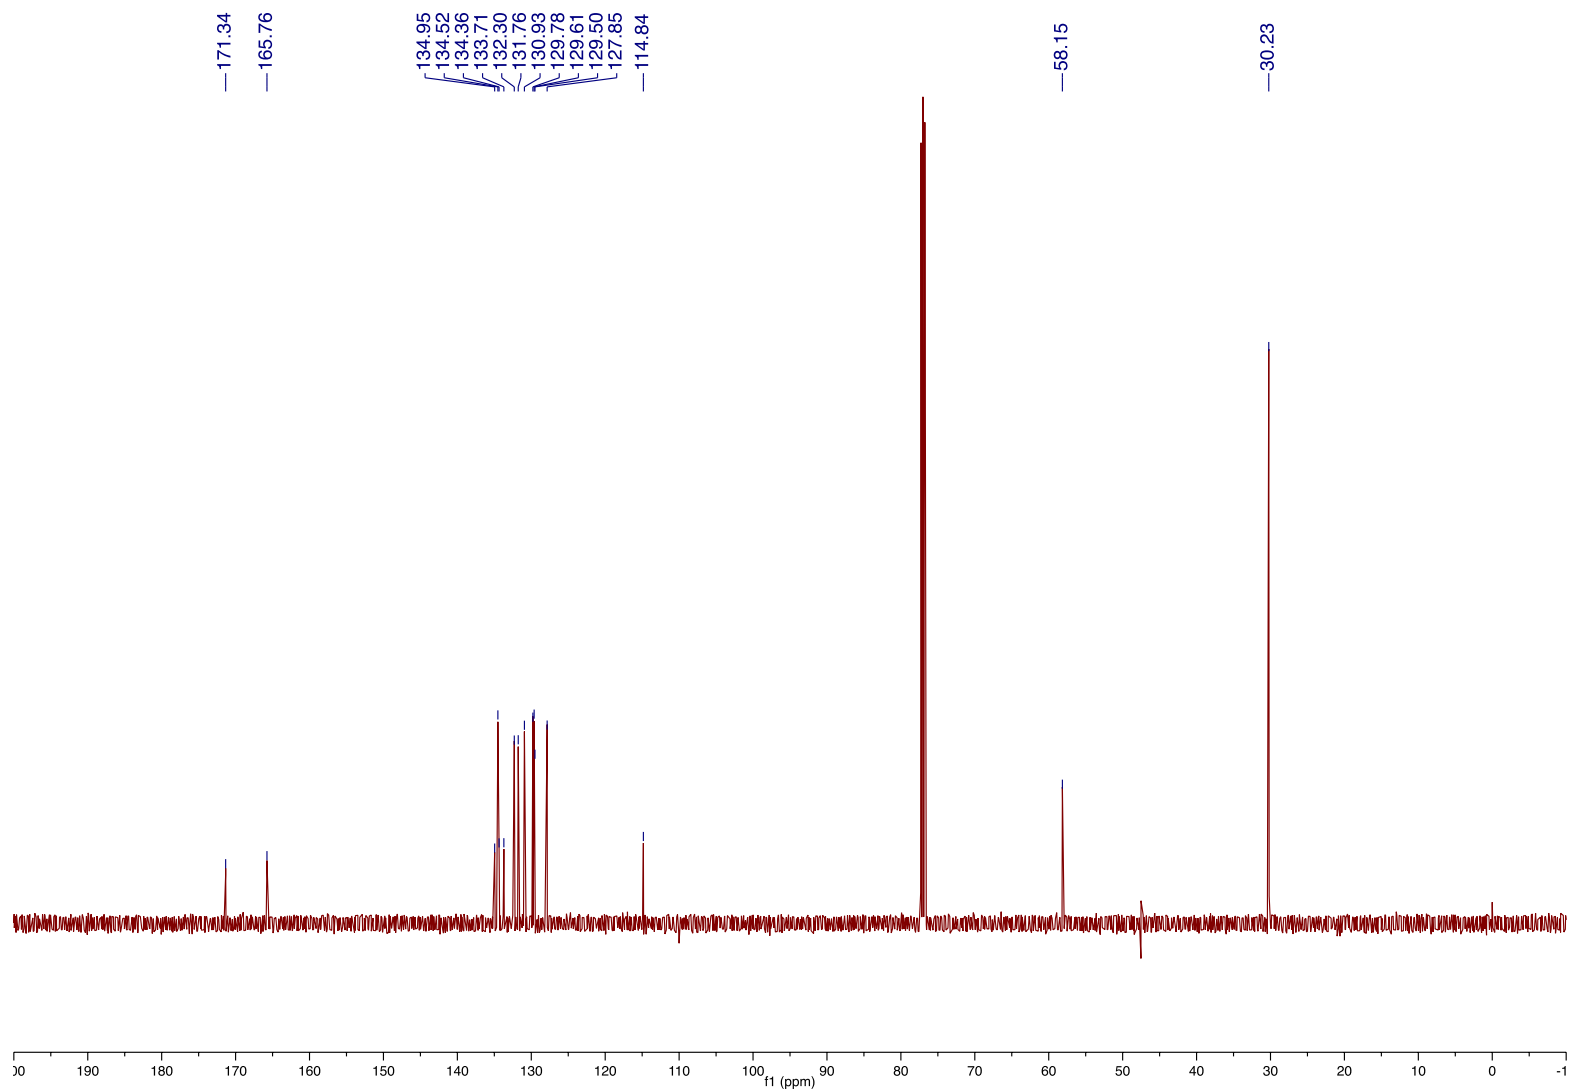

$^1\text{H}$  NMR (500 MHz,  $\text{CDCl}_3$ )

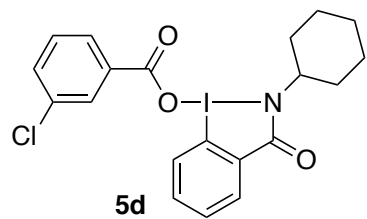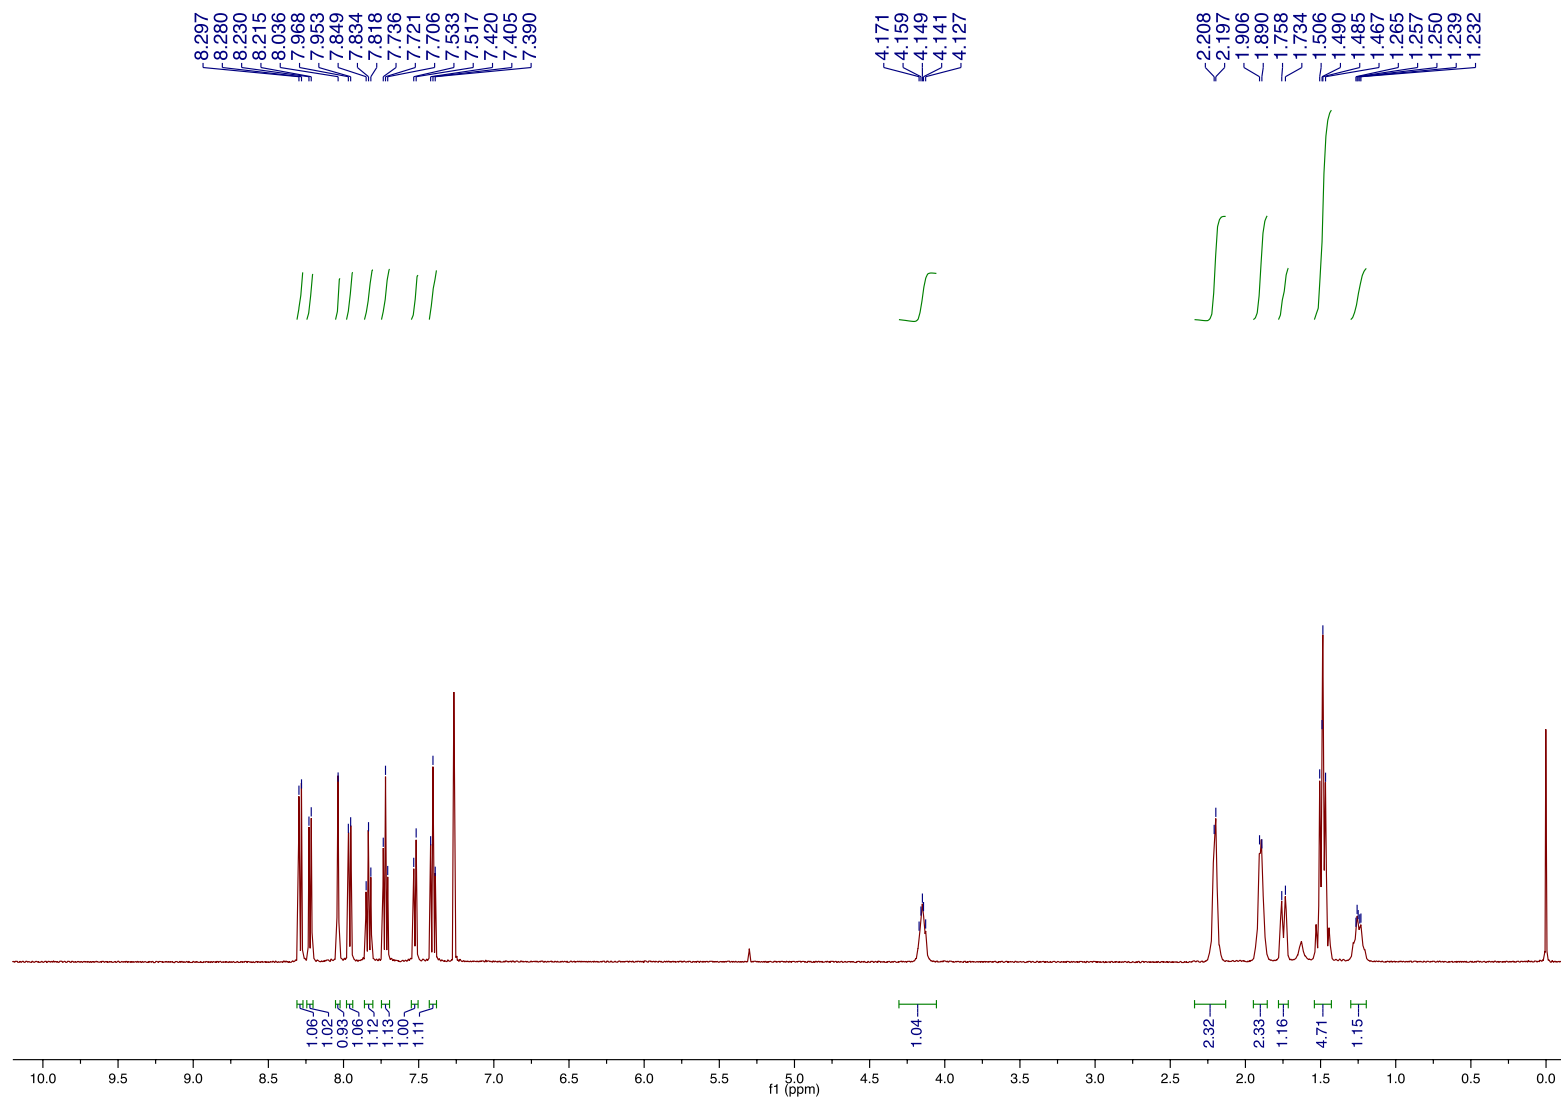

$^{13}\text{C}$  NMR (125 MHz,  $\text{CDCl}_3$ )

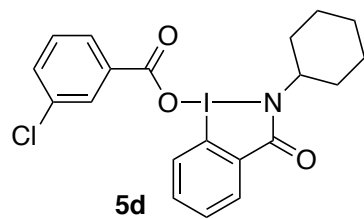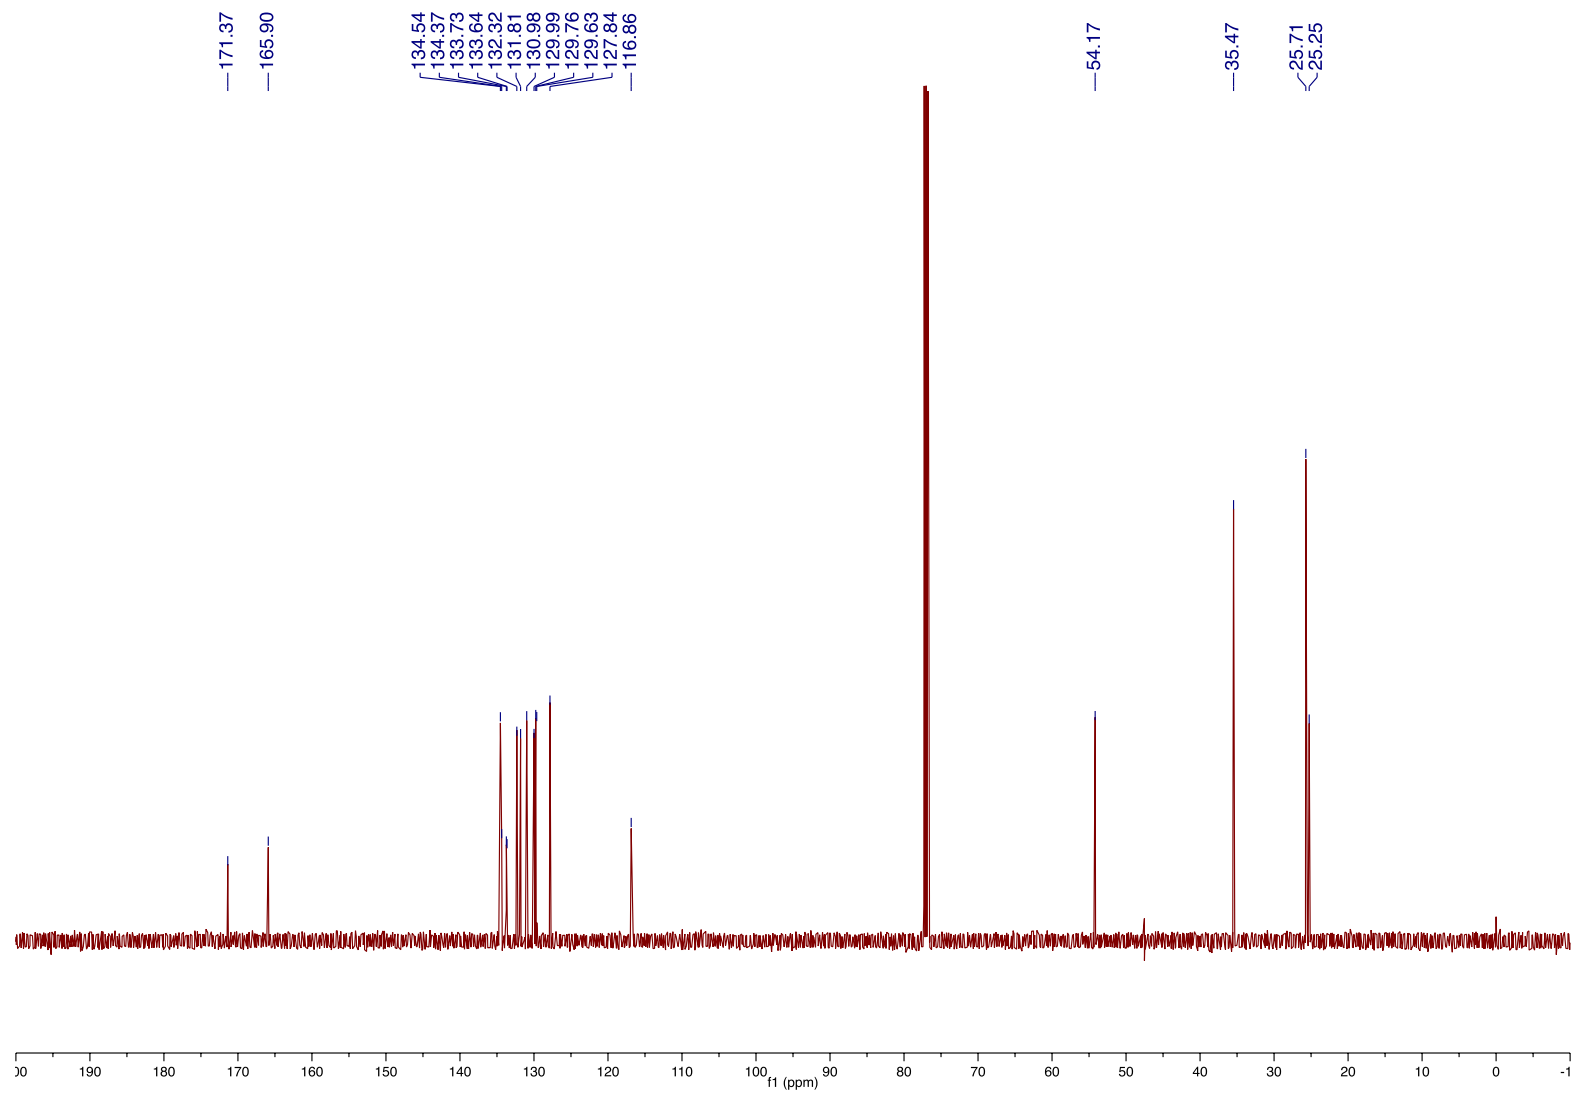



$^1\text{H}$  NMR (500 MHz,  $\text{CDCl}_3$ )

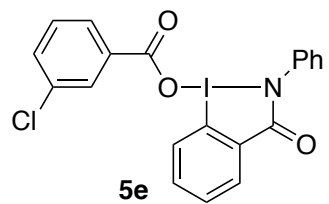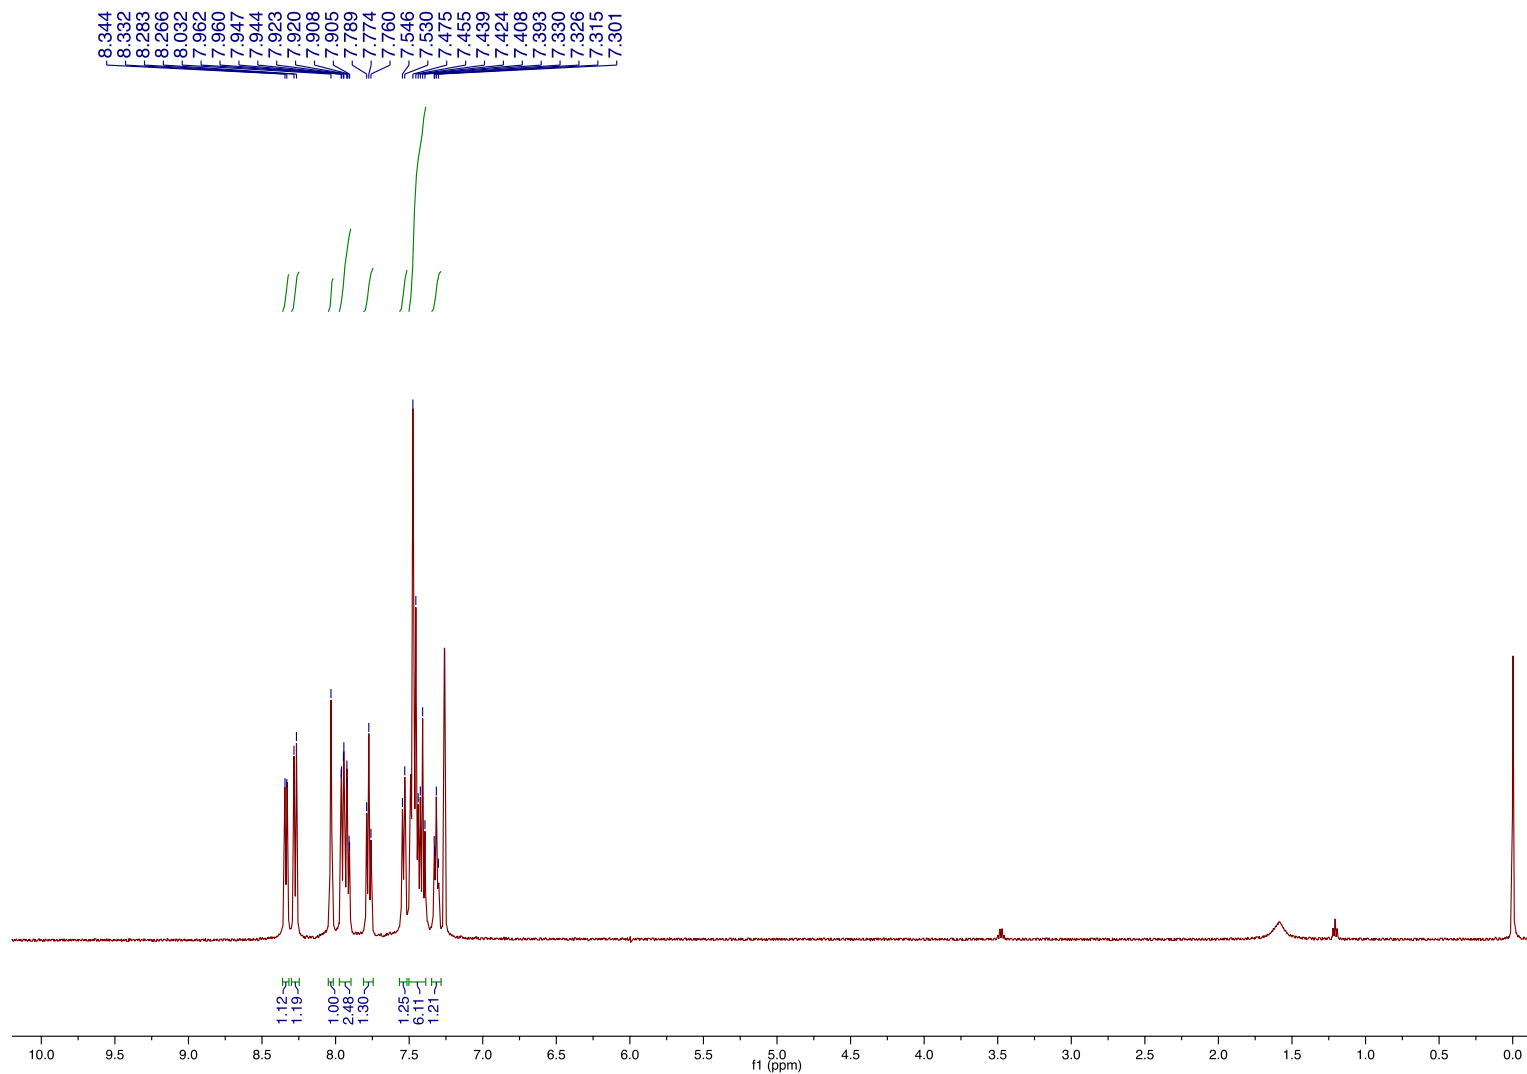

$^{13}\text{C}$  NMR (125 MHz,  $\text{CDCl}_3$ )

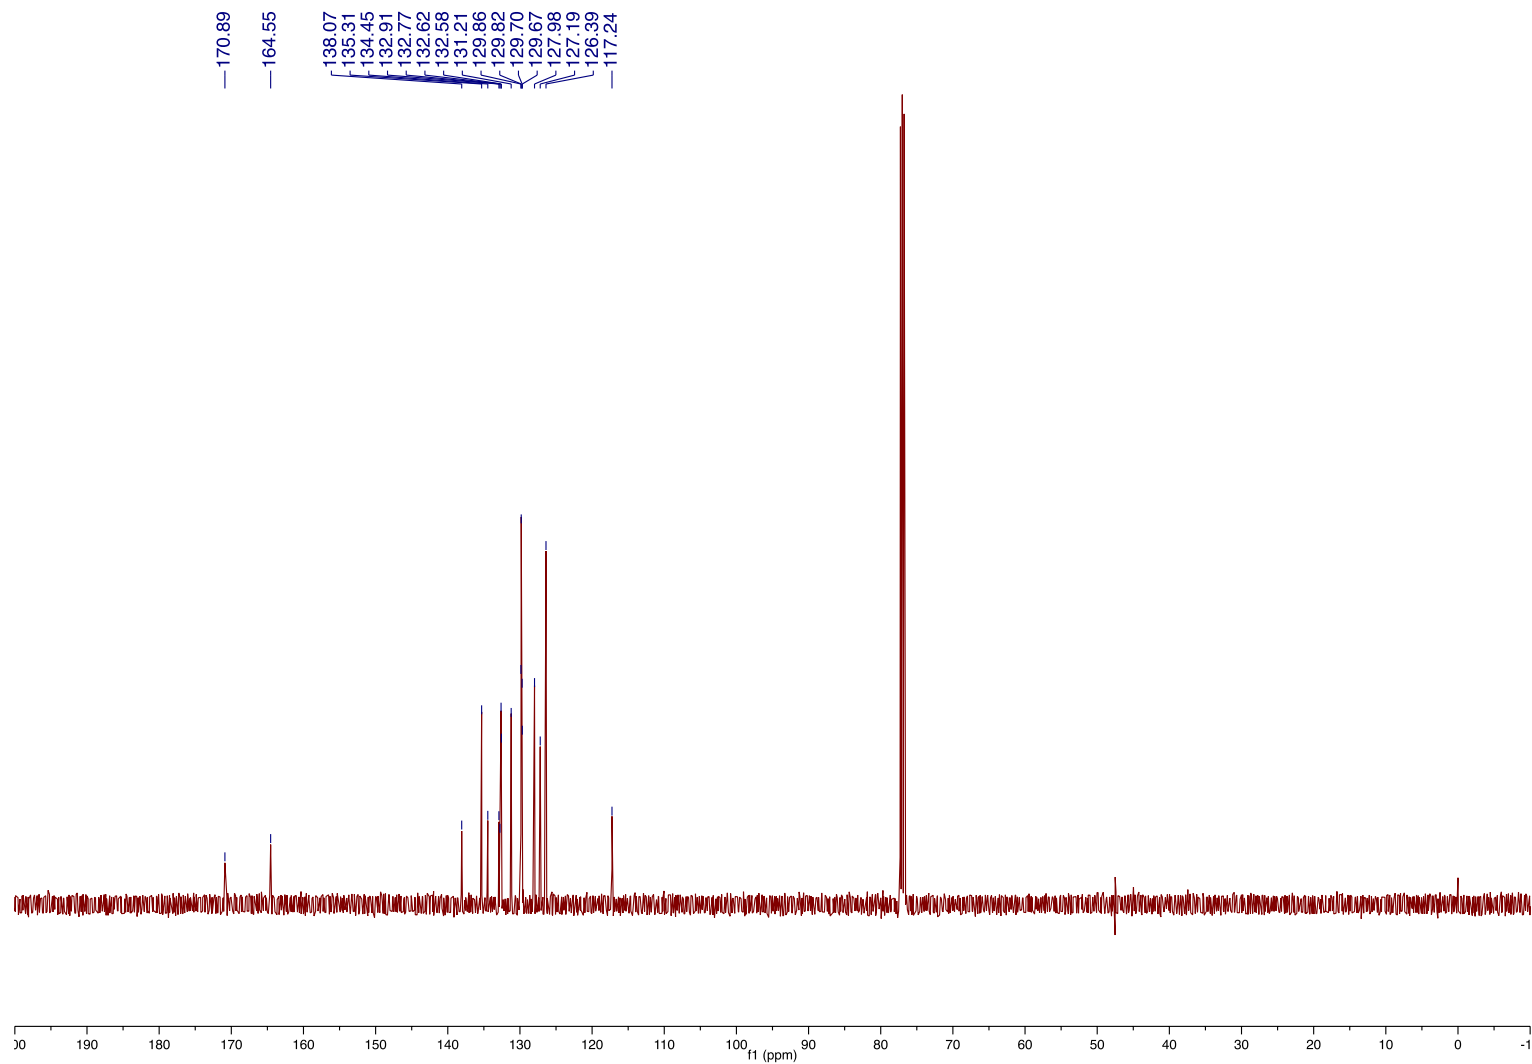

$^1\text{H}$  NMR (500 MHz,  $\text{CDCl}_3$ )

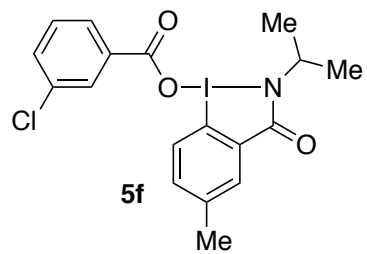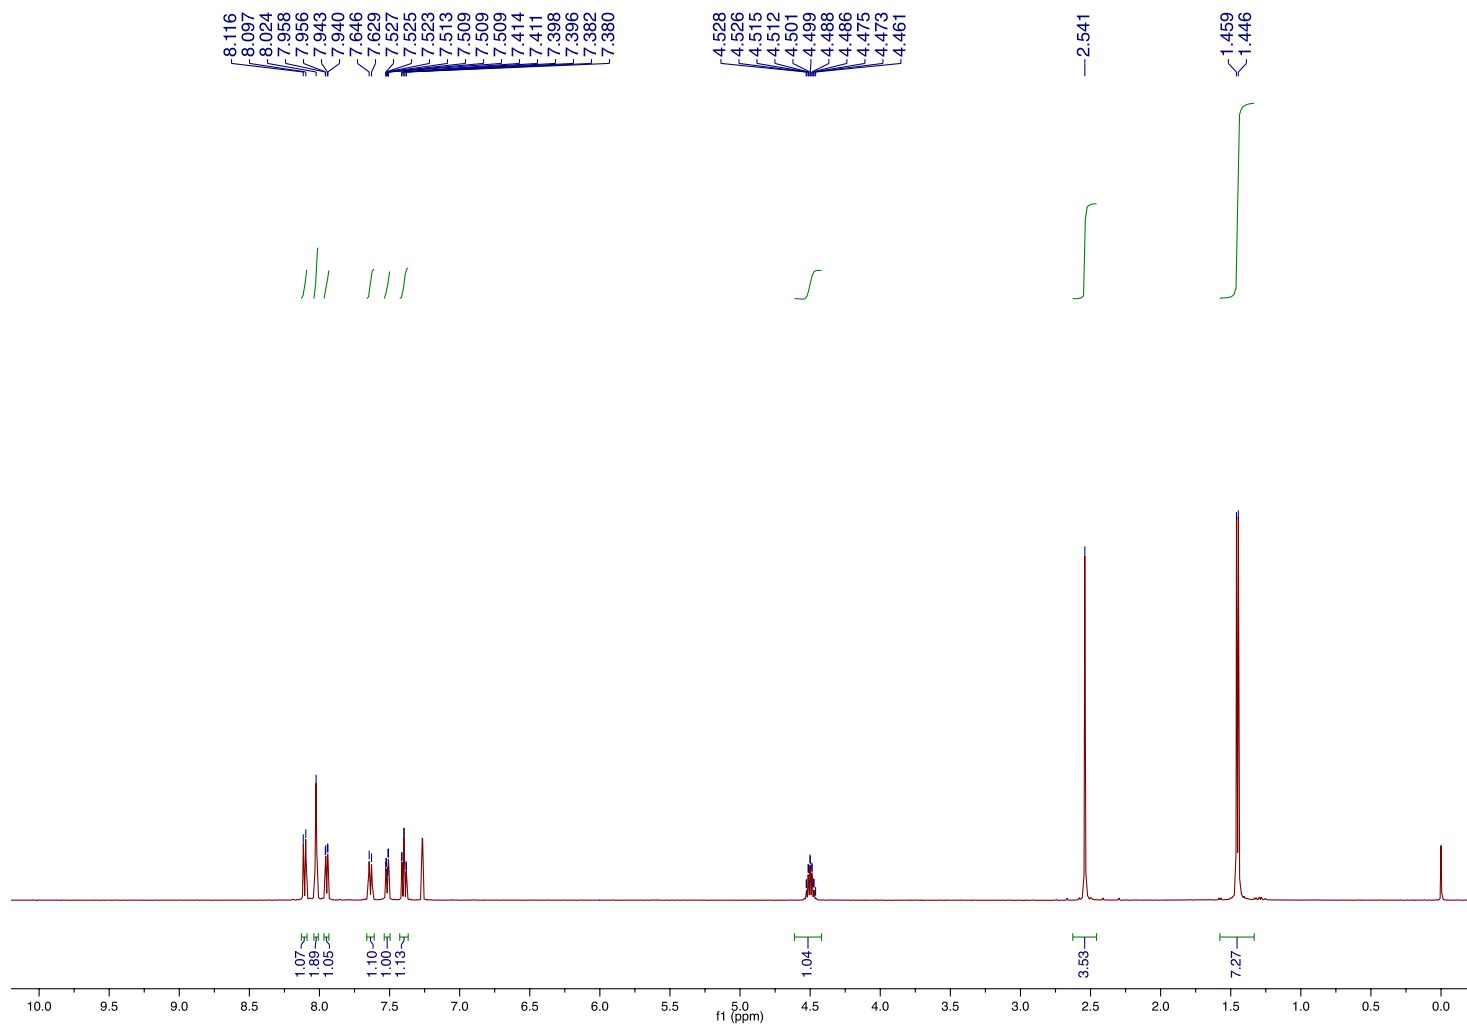

$^{13}\text{C}$  NMR (125 MHz,  $\text{CDCl}_3$ )

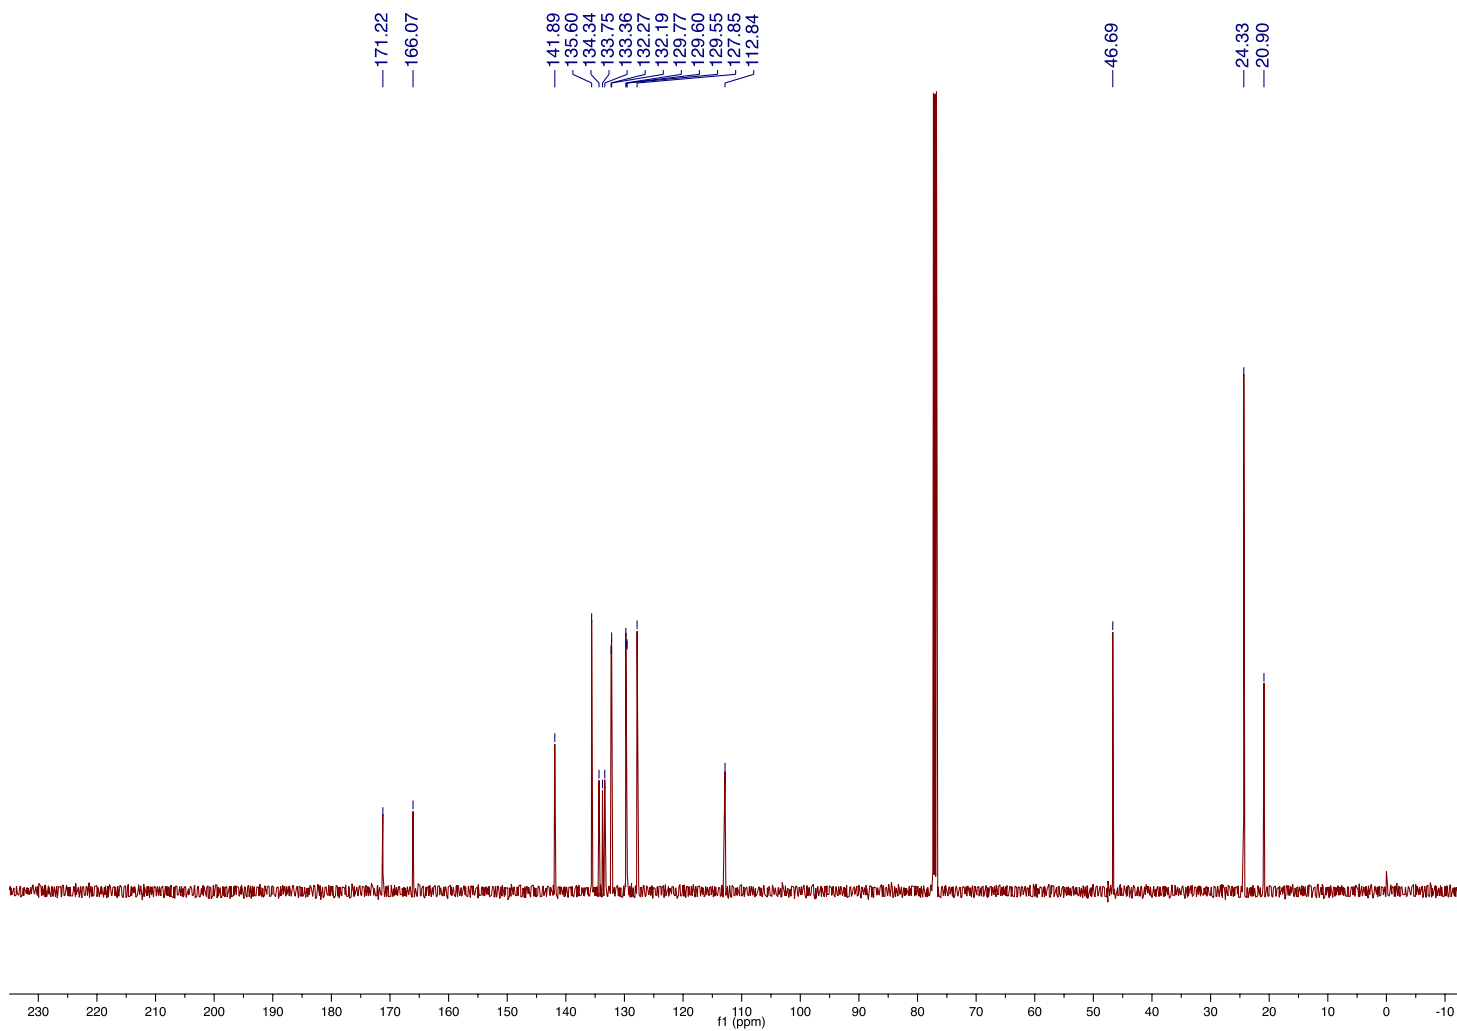

$^1\text{H}$  NMR (500 MHz,  $\text{CDCl}_3$ )

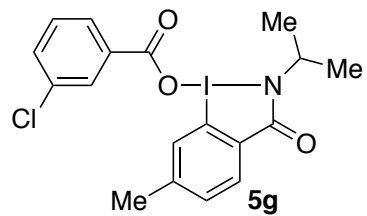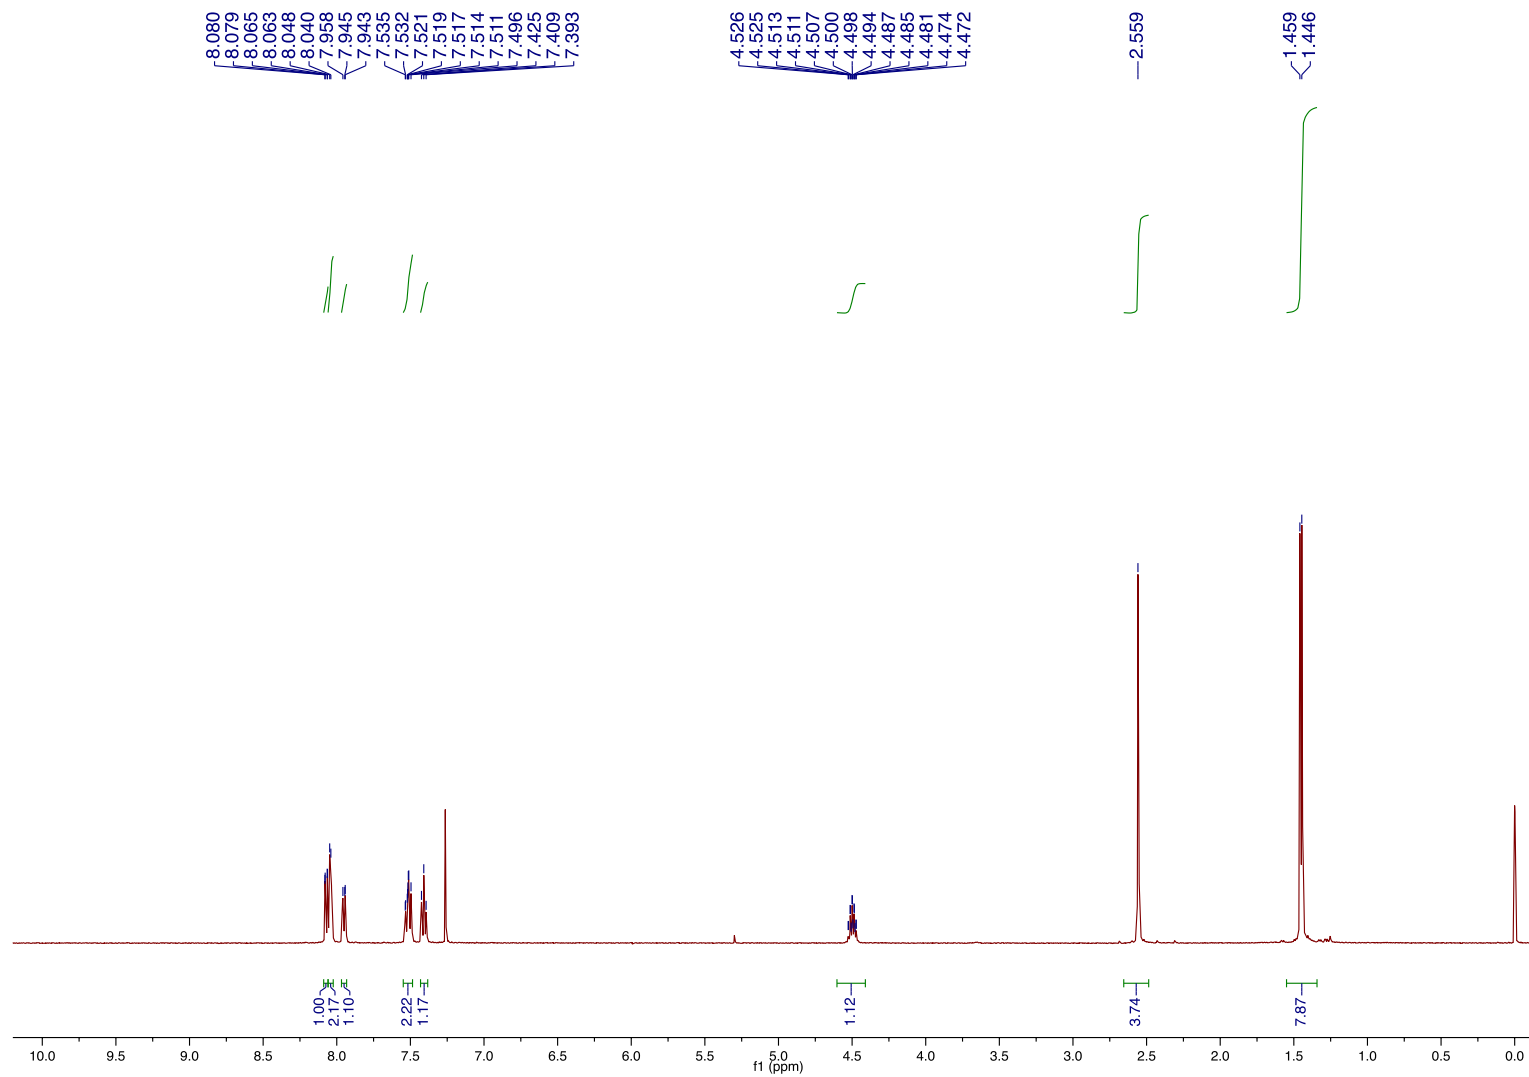

$^{13}\text{C}$  NMR (125 MHz,  $\text{CDCl}_3$ )

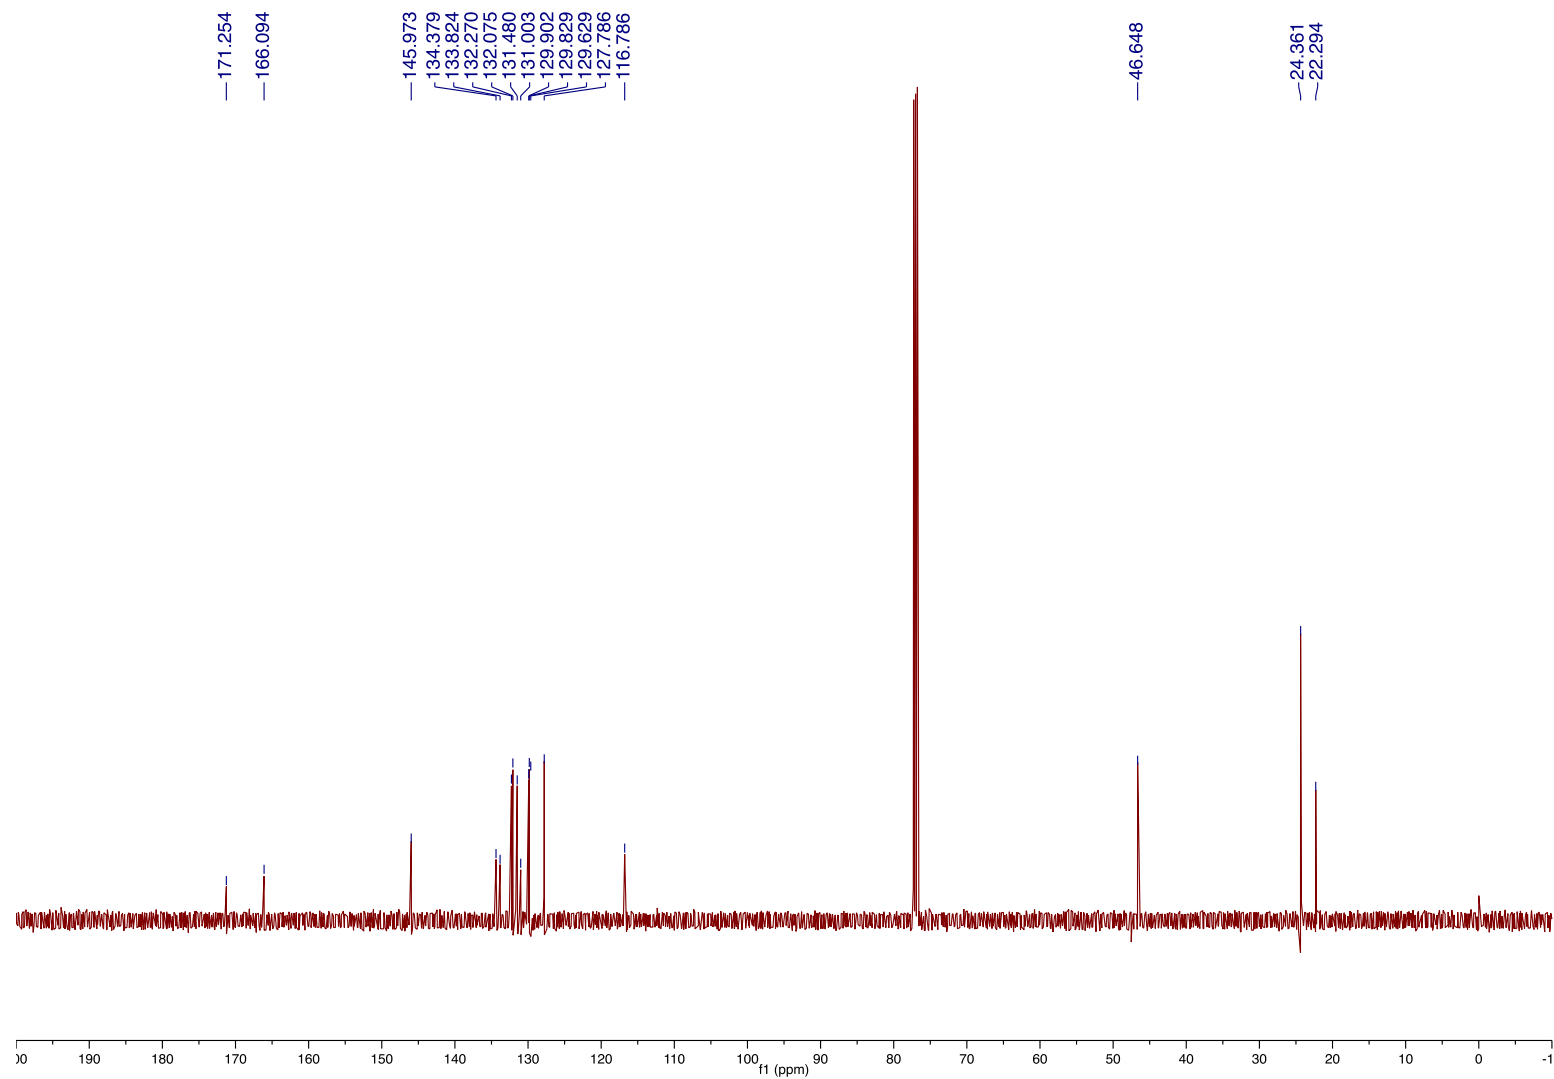

$^1\text{H}$  NMR (400 MHz,  $\text{CDCl}_3$ )

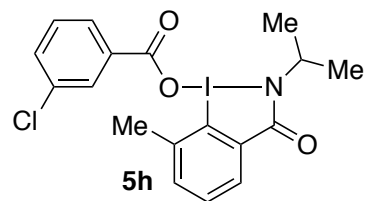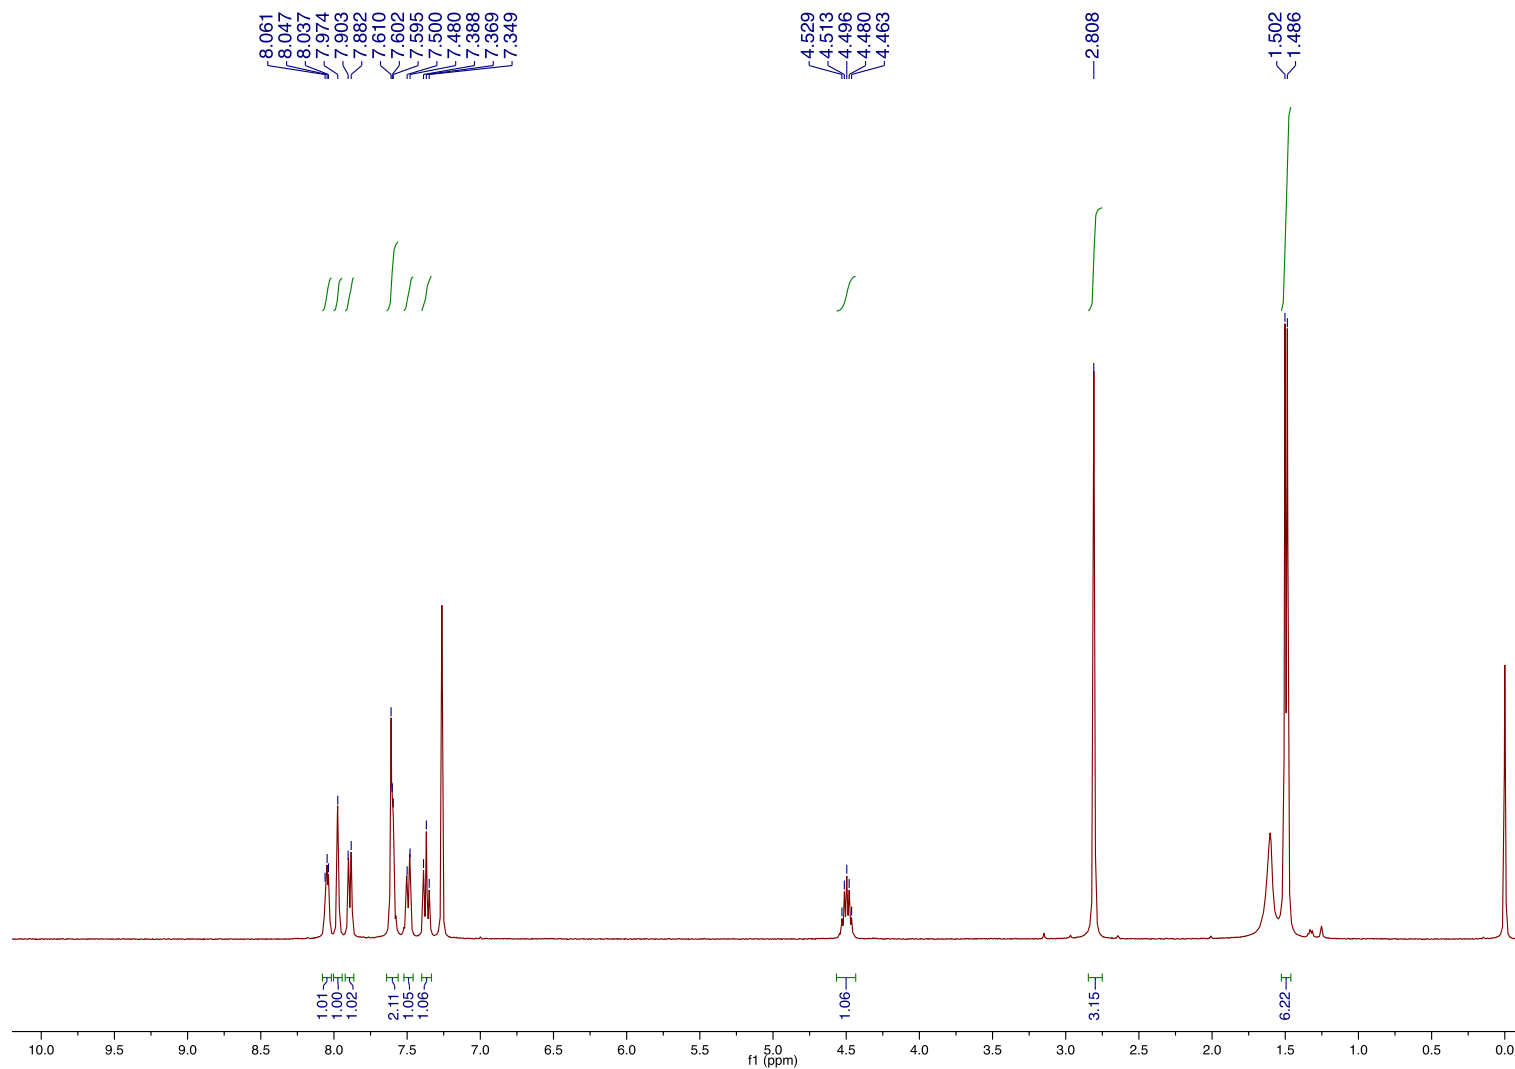

$^{13}\text{C}$  NMR (100 MHz,  $\text{CDCl}_3$ )

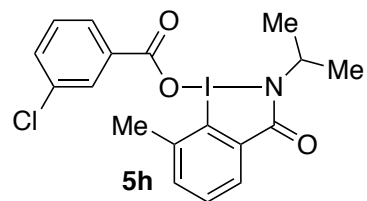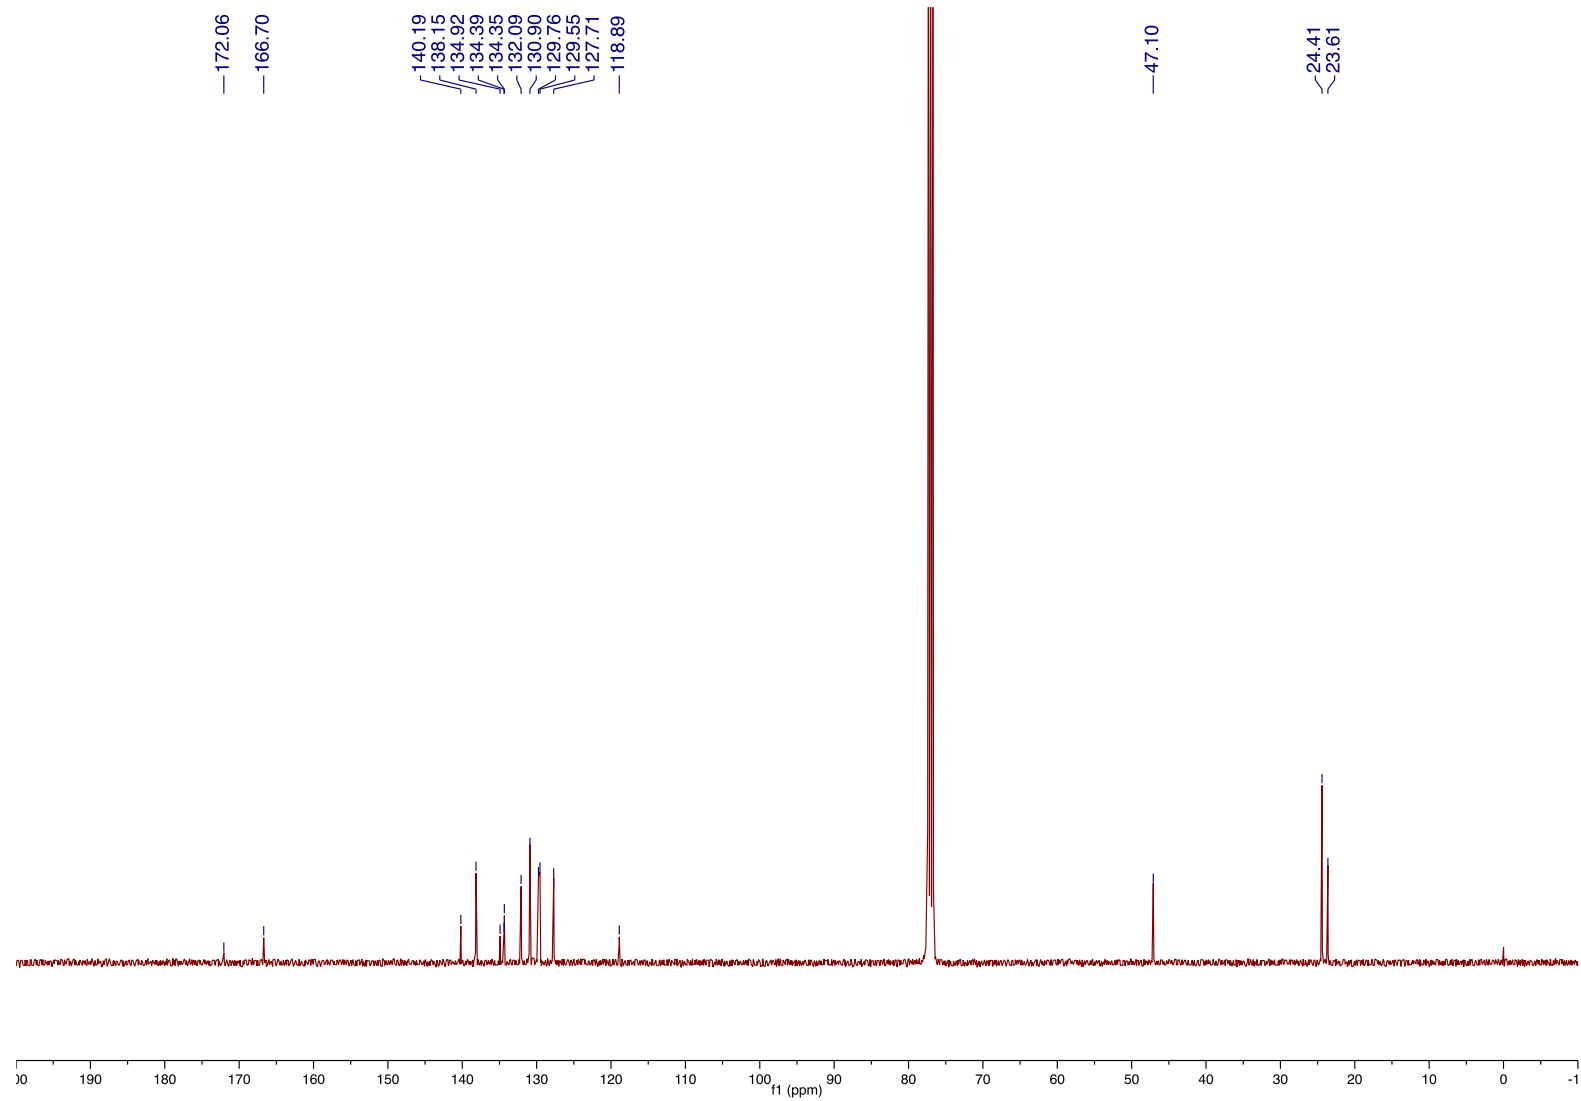



$^1\text{H}$  NMR (500 MHz,  $\text{CDCl}_3$ )

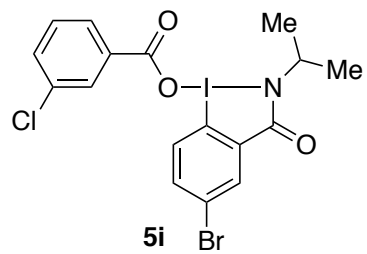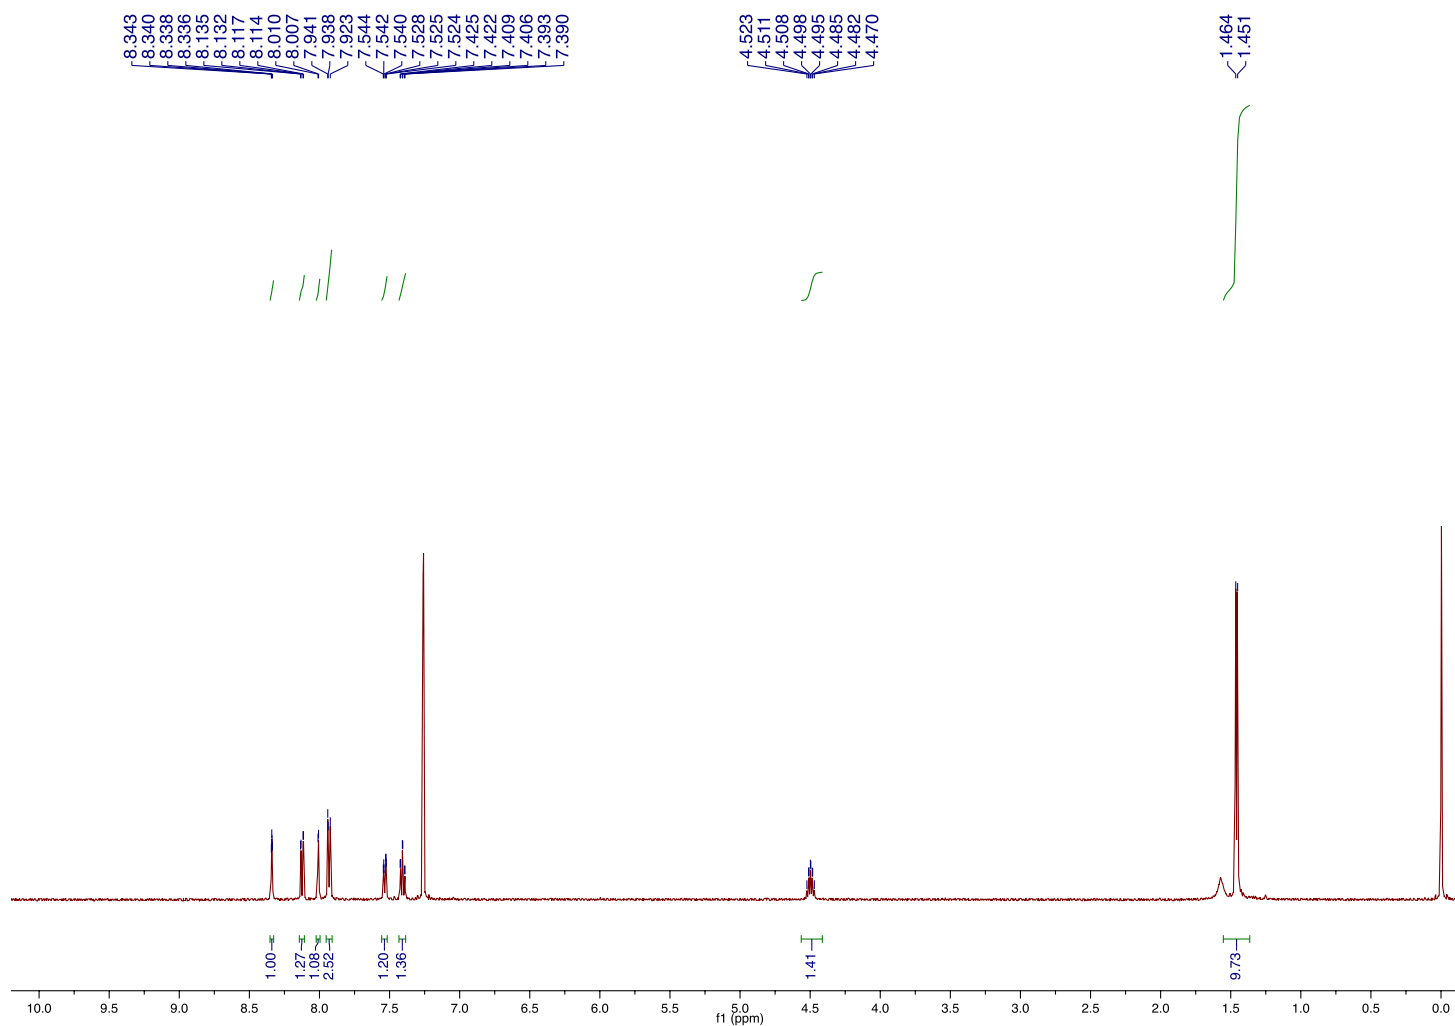

$^{13}\text{C}$  NMR (125 MHz,  $\text{CDCl}_3$ )

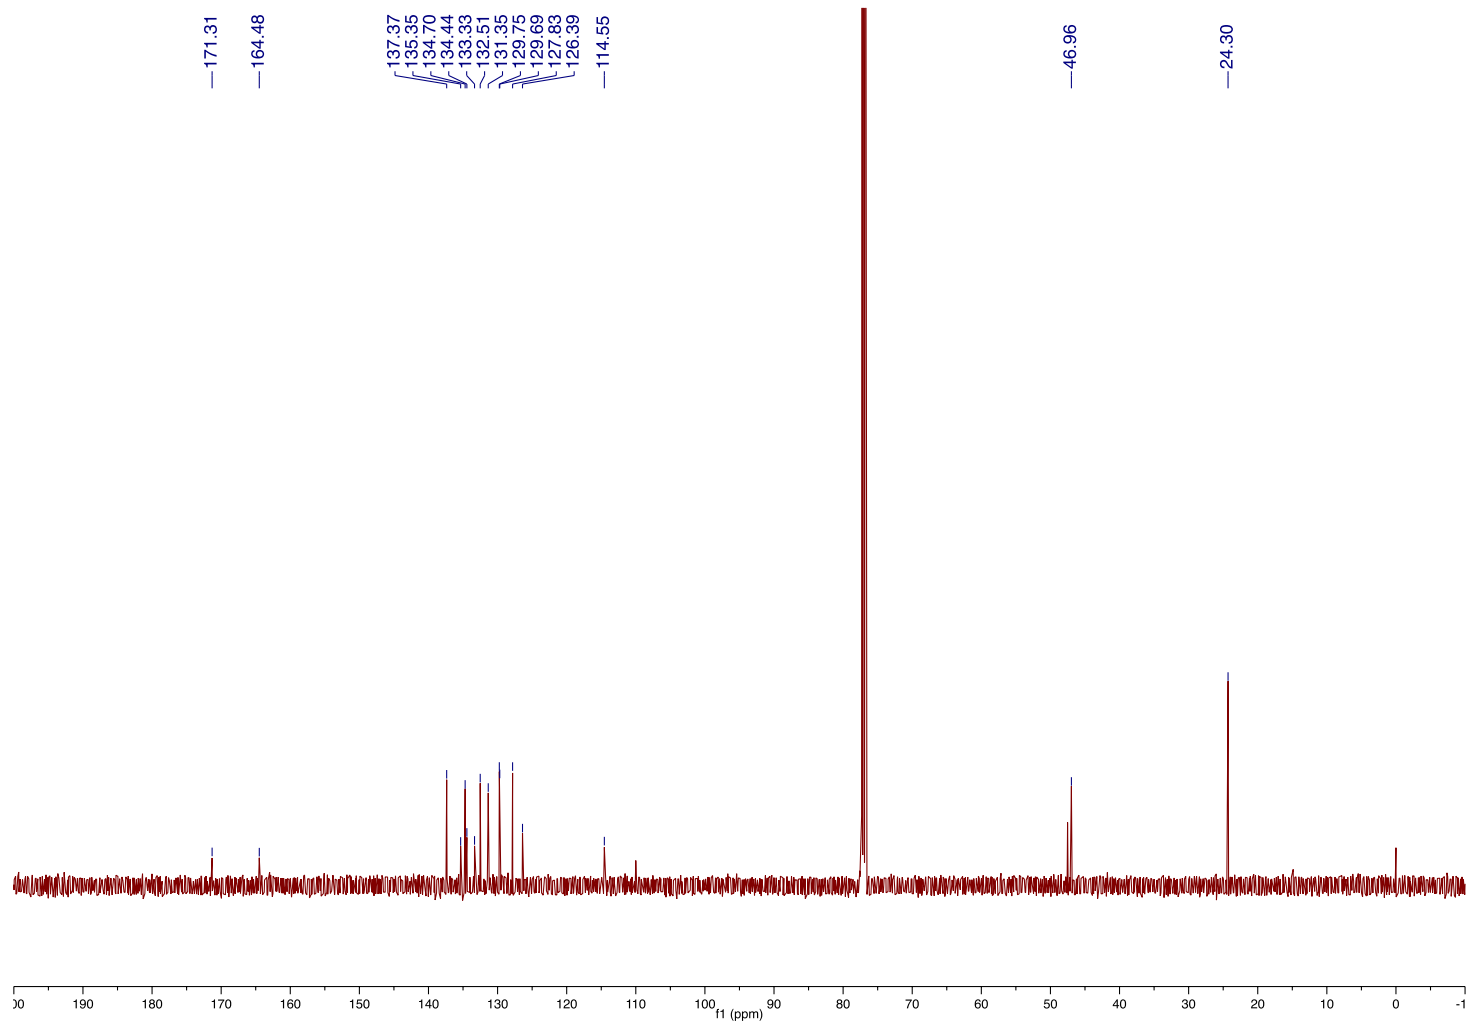

$^1\text{H}$  NMR (500 MHz,  $\text{CDCl}_3$ )

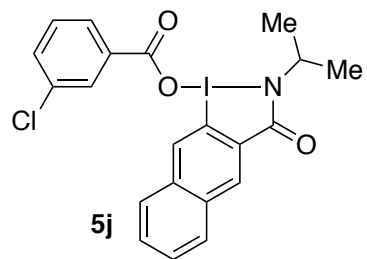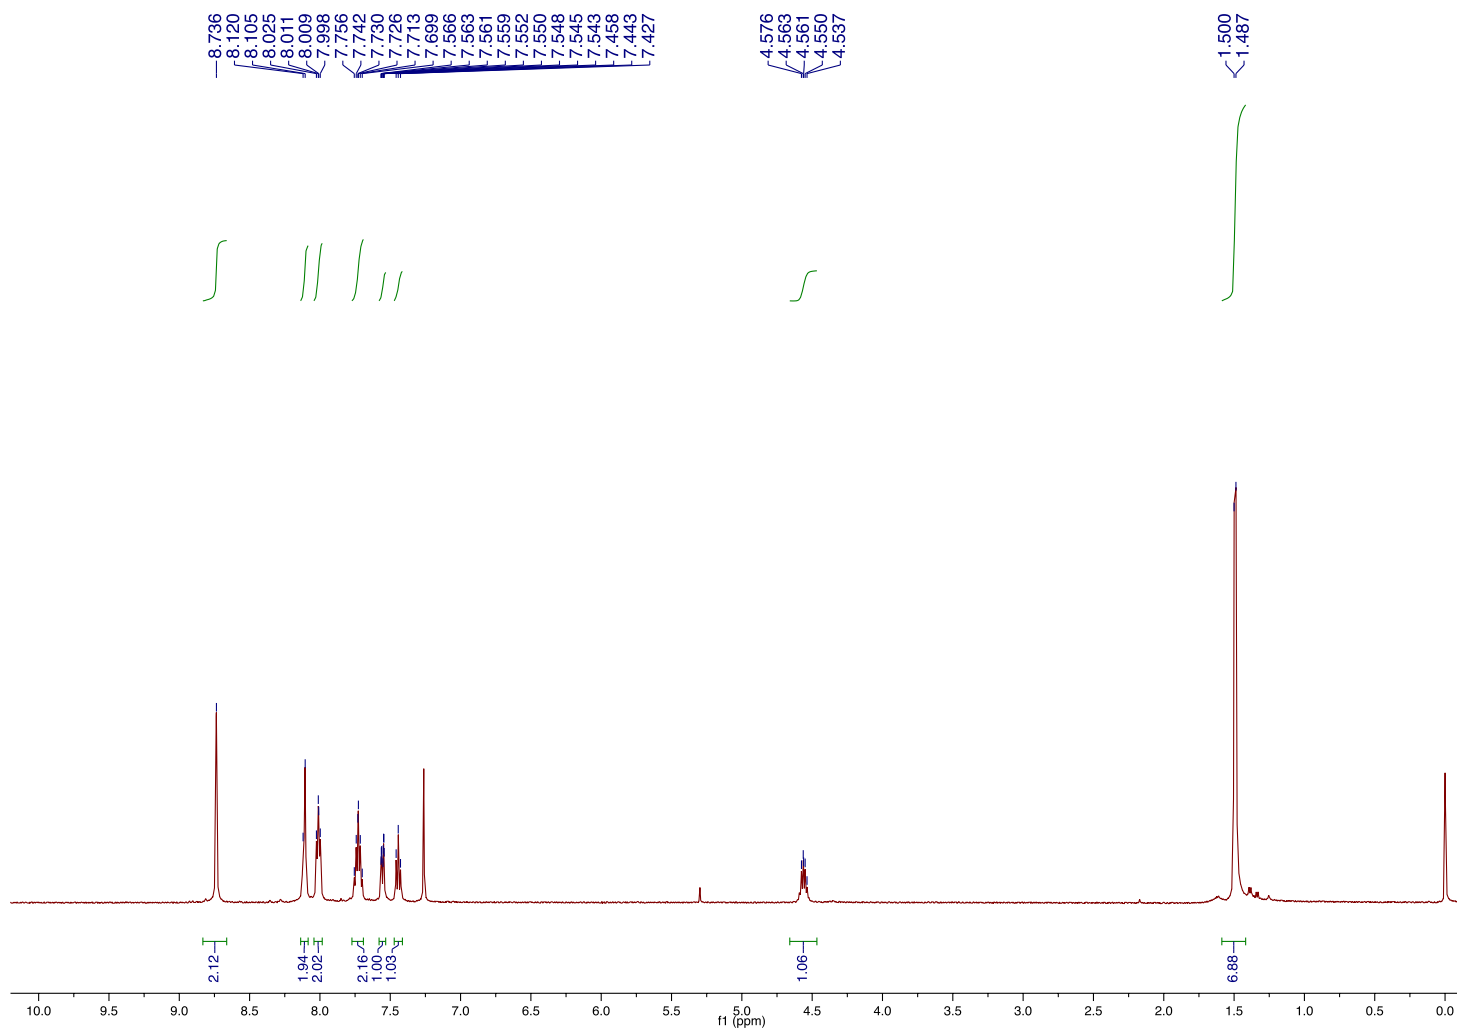

$^{13}\text{C}$  NMR (125 MHz,  $\text{CDCl}_3$ )

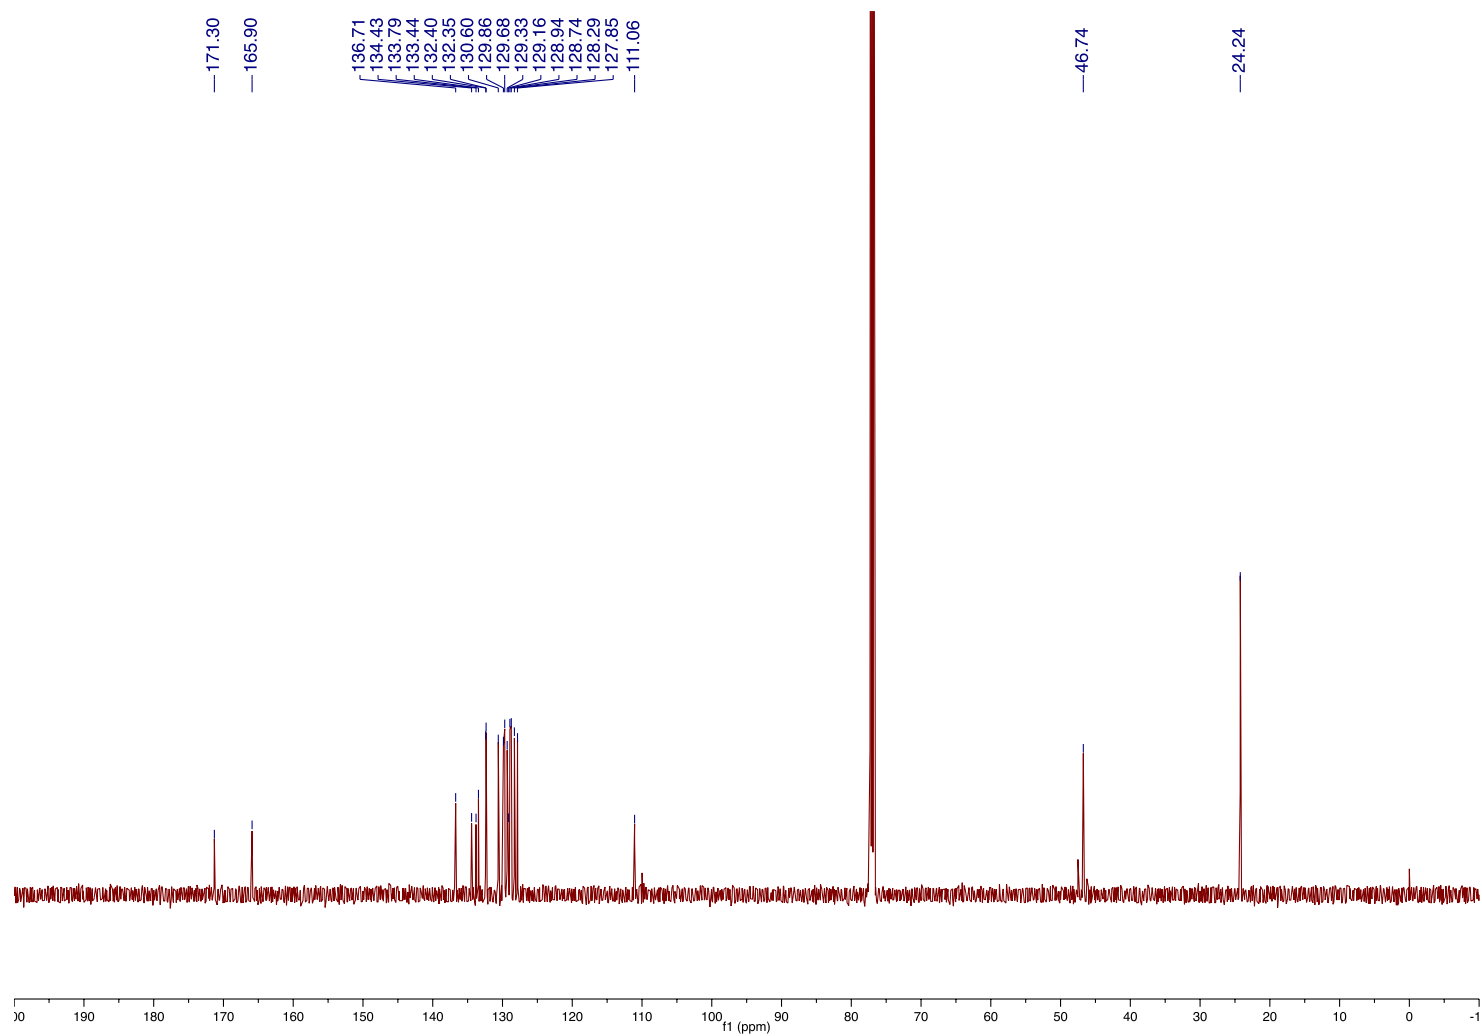

$^1\text{H}$  NMR (400 MHz,  $\text{CDCl}_3$ )

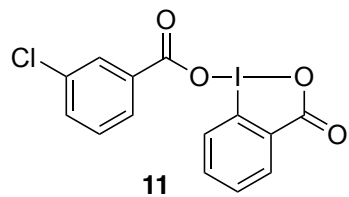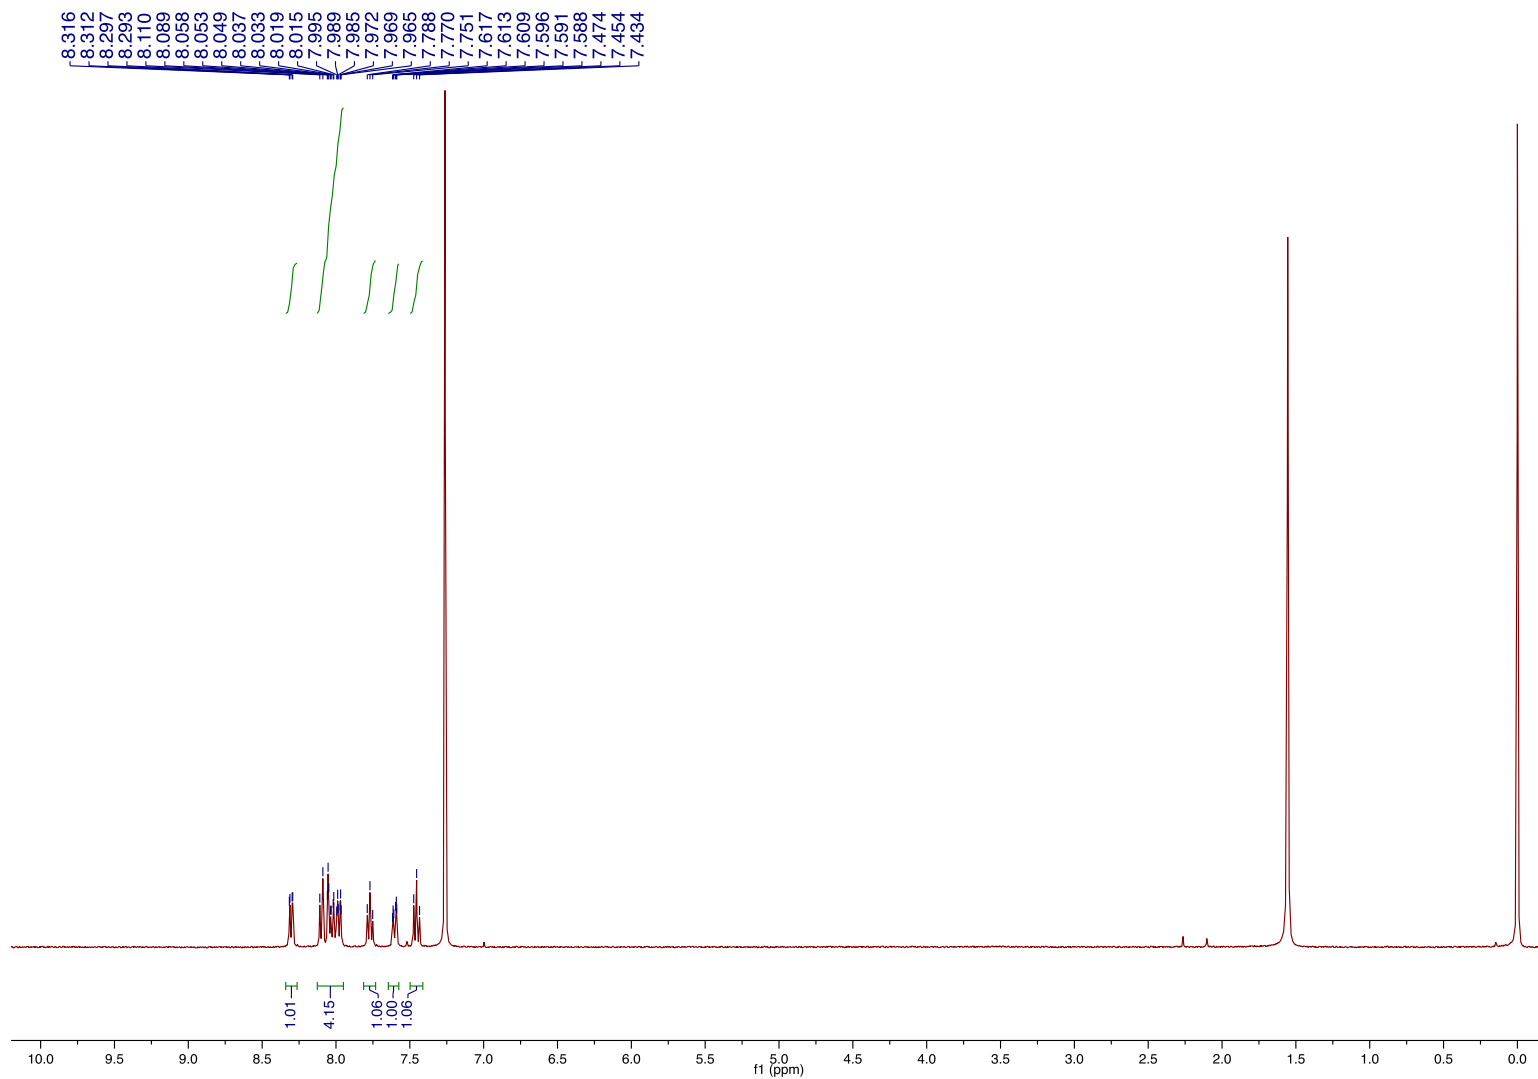

$^{13}\text{C}$  NMR (100 MHz,  $\text{CDCl}_3$ )

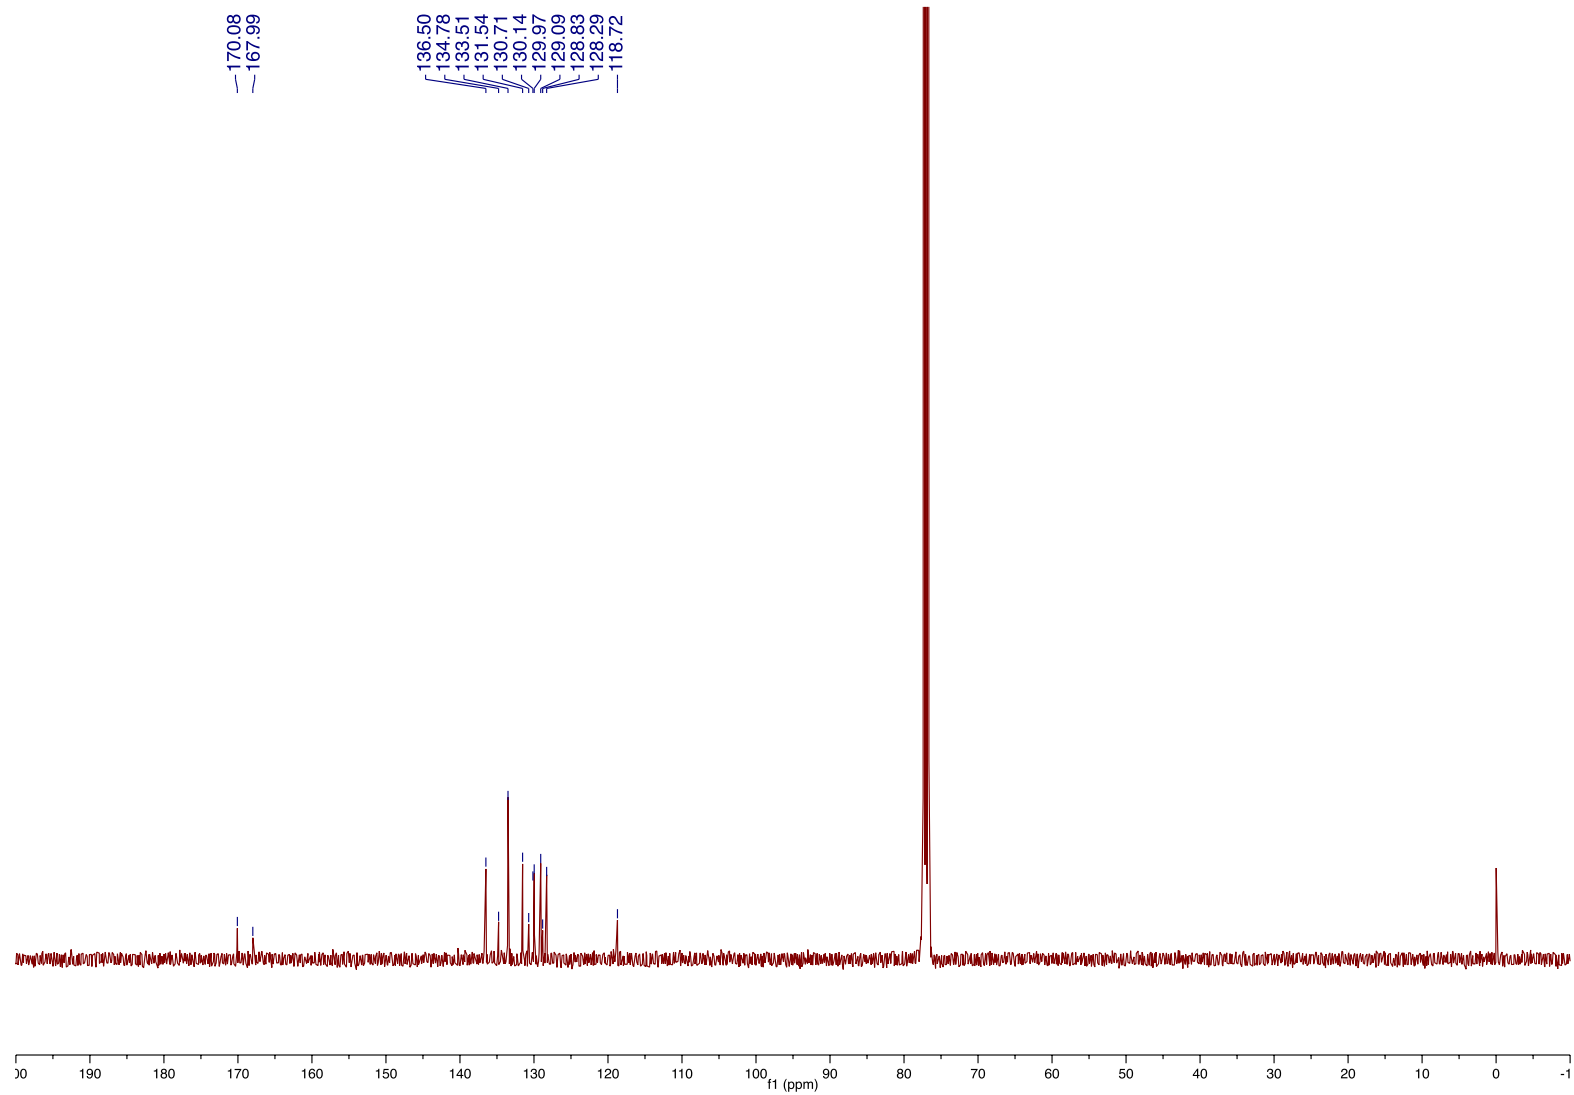

$^1\text{H}$  NMR (500 MHz,  $\text{CDCl}_3$ )

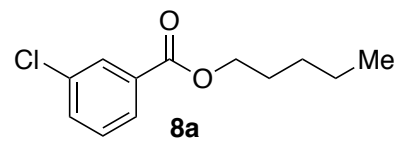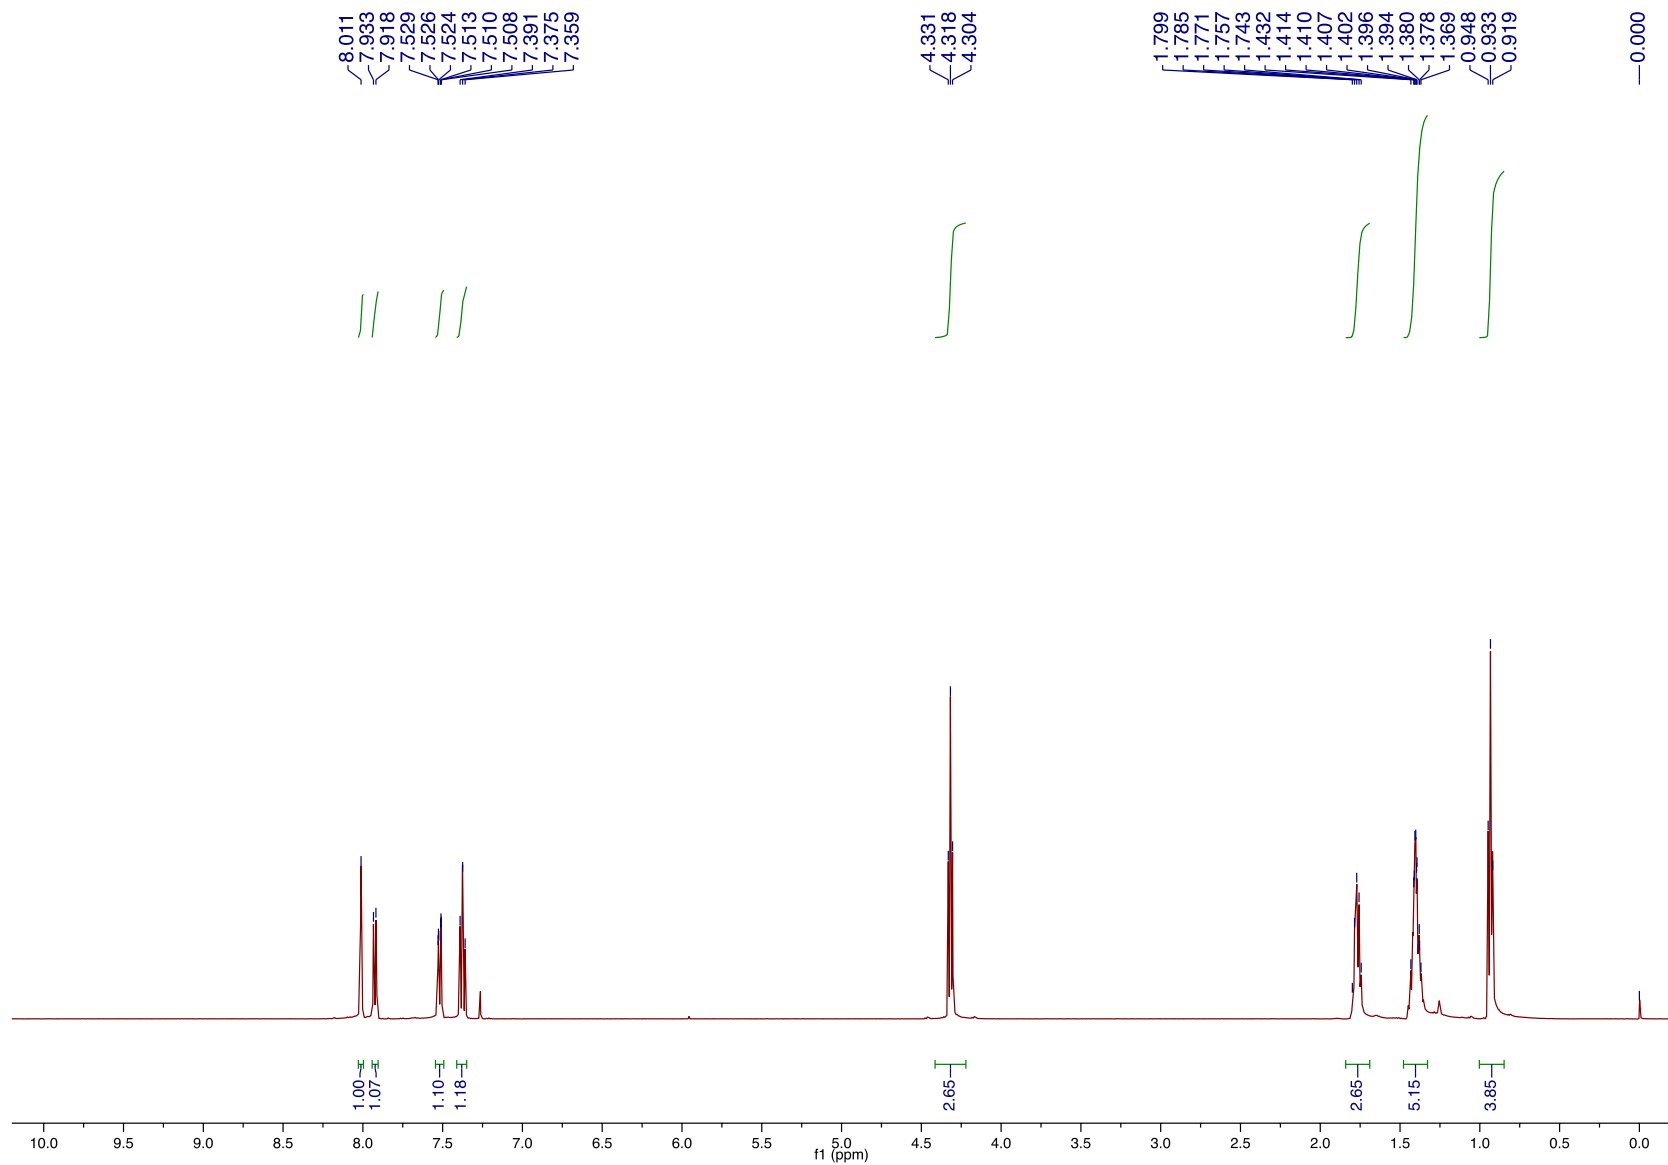

$^{13}\text{C}$  NMR (125 MHz,  $\text{CDCl}_3$ )

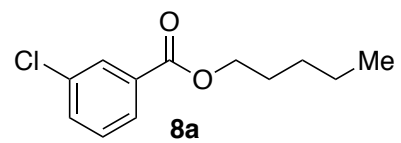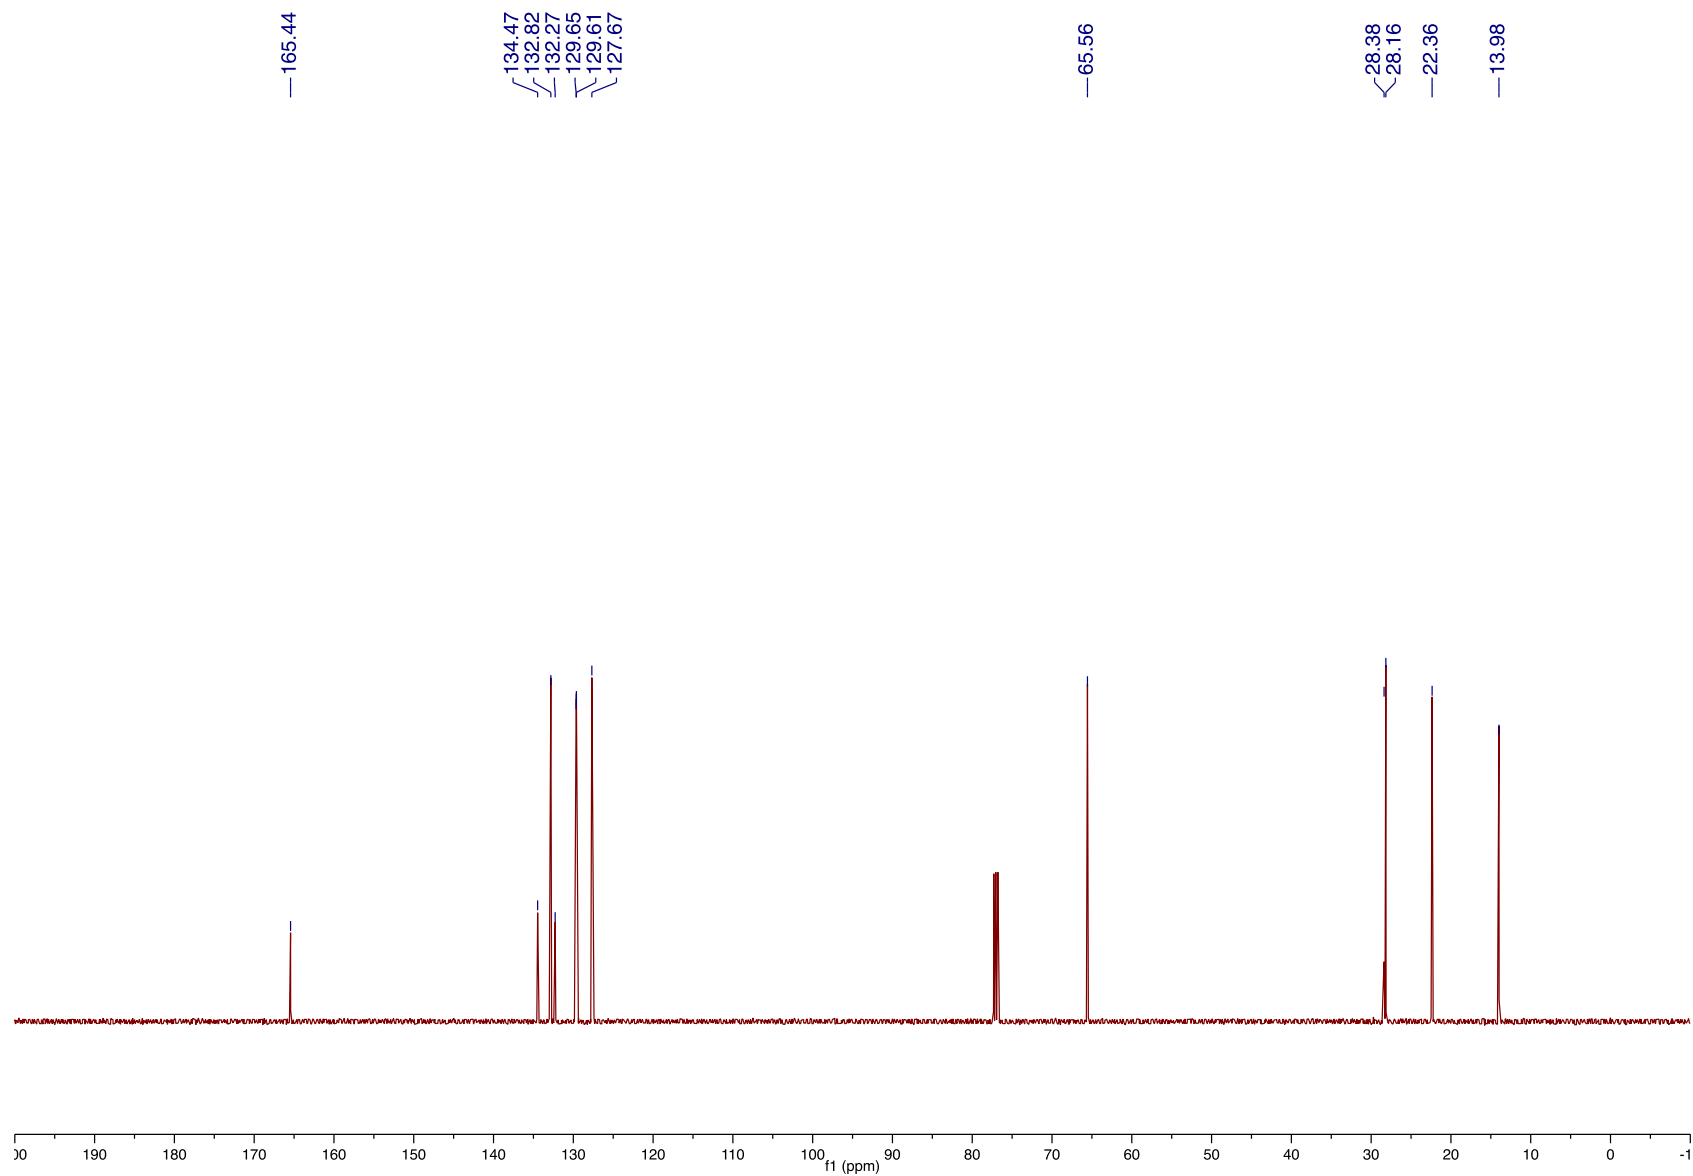



$^1\text{H}$  NMR (500 MHz,  $\text{CDCl}_3$ )

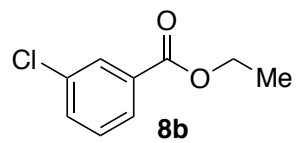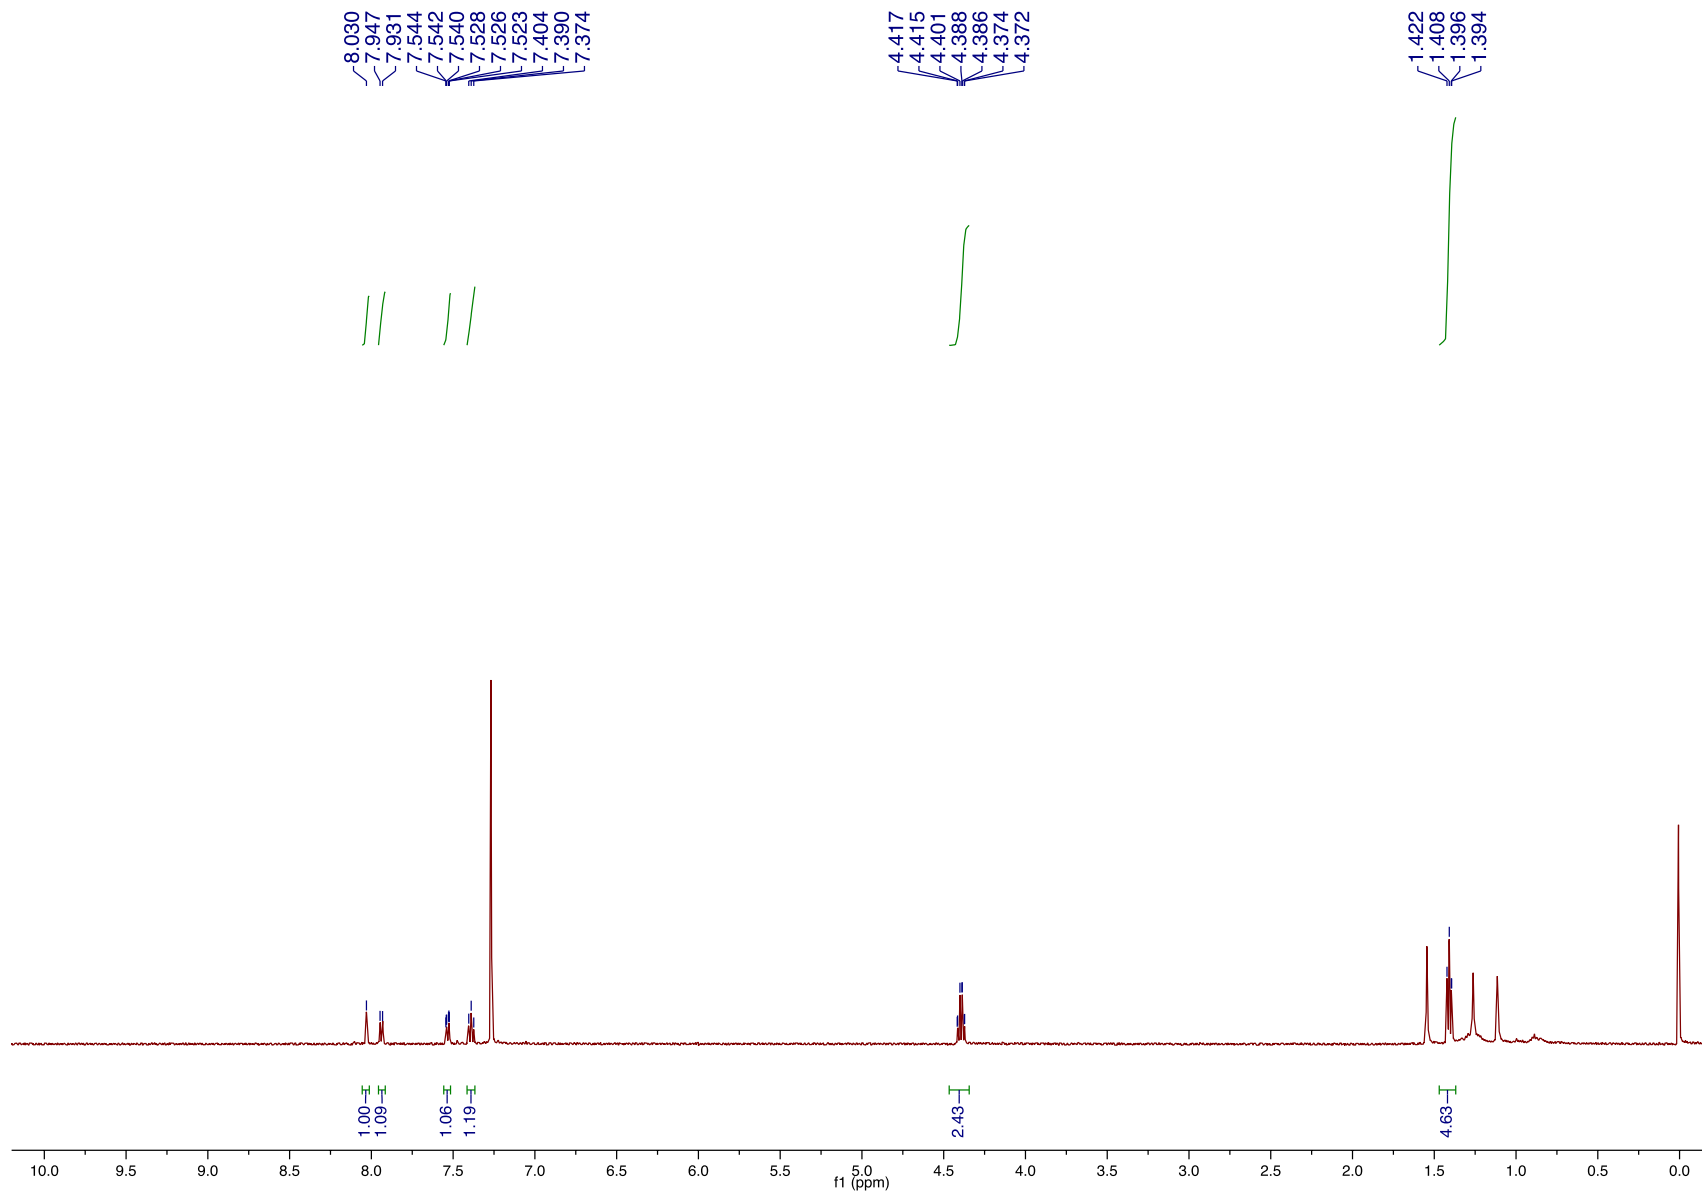

$^1\text{H}$  NMR (500 MHz,  $\text{CDCl}_3$ )

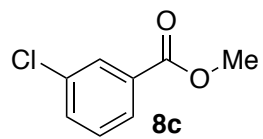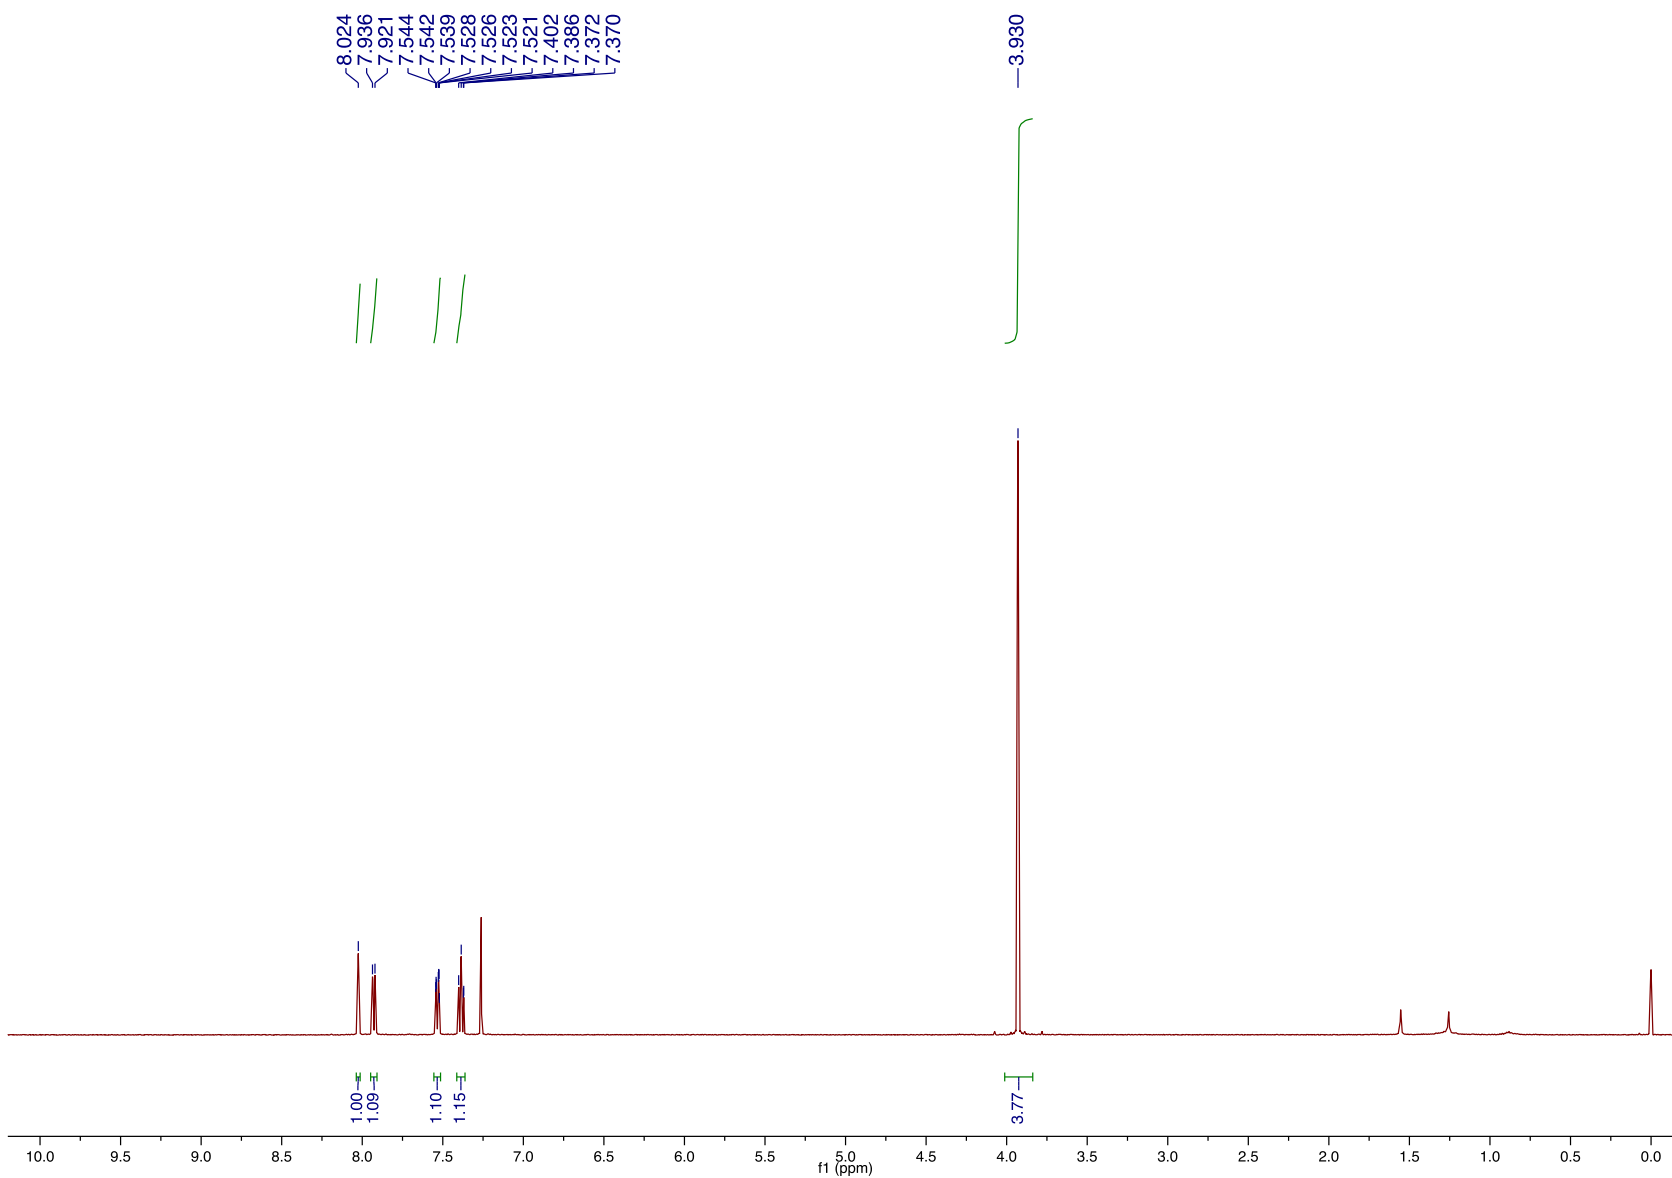

$^{13}\text{C}$  NMR (125 MHz,  $\text{CDCl}_3$ )

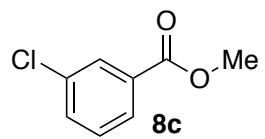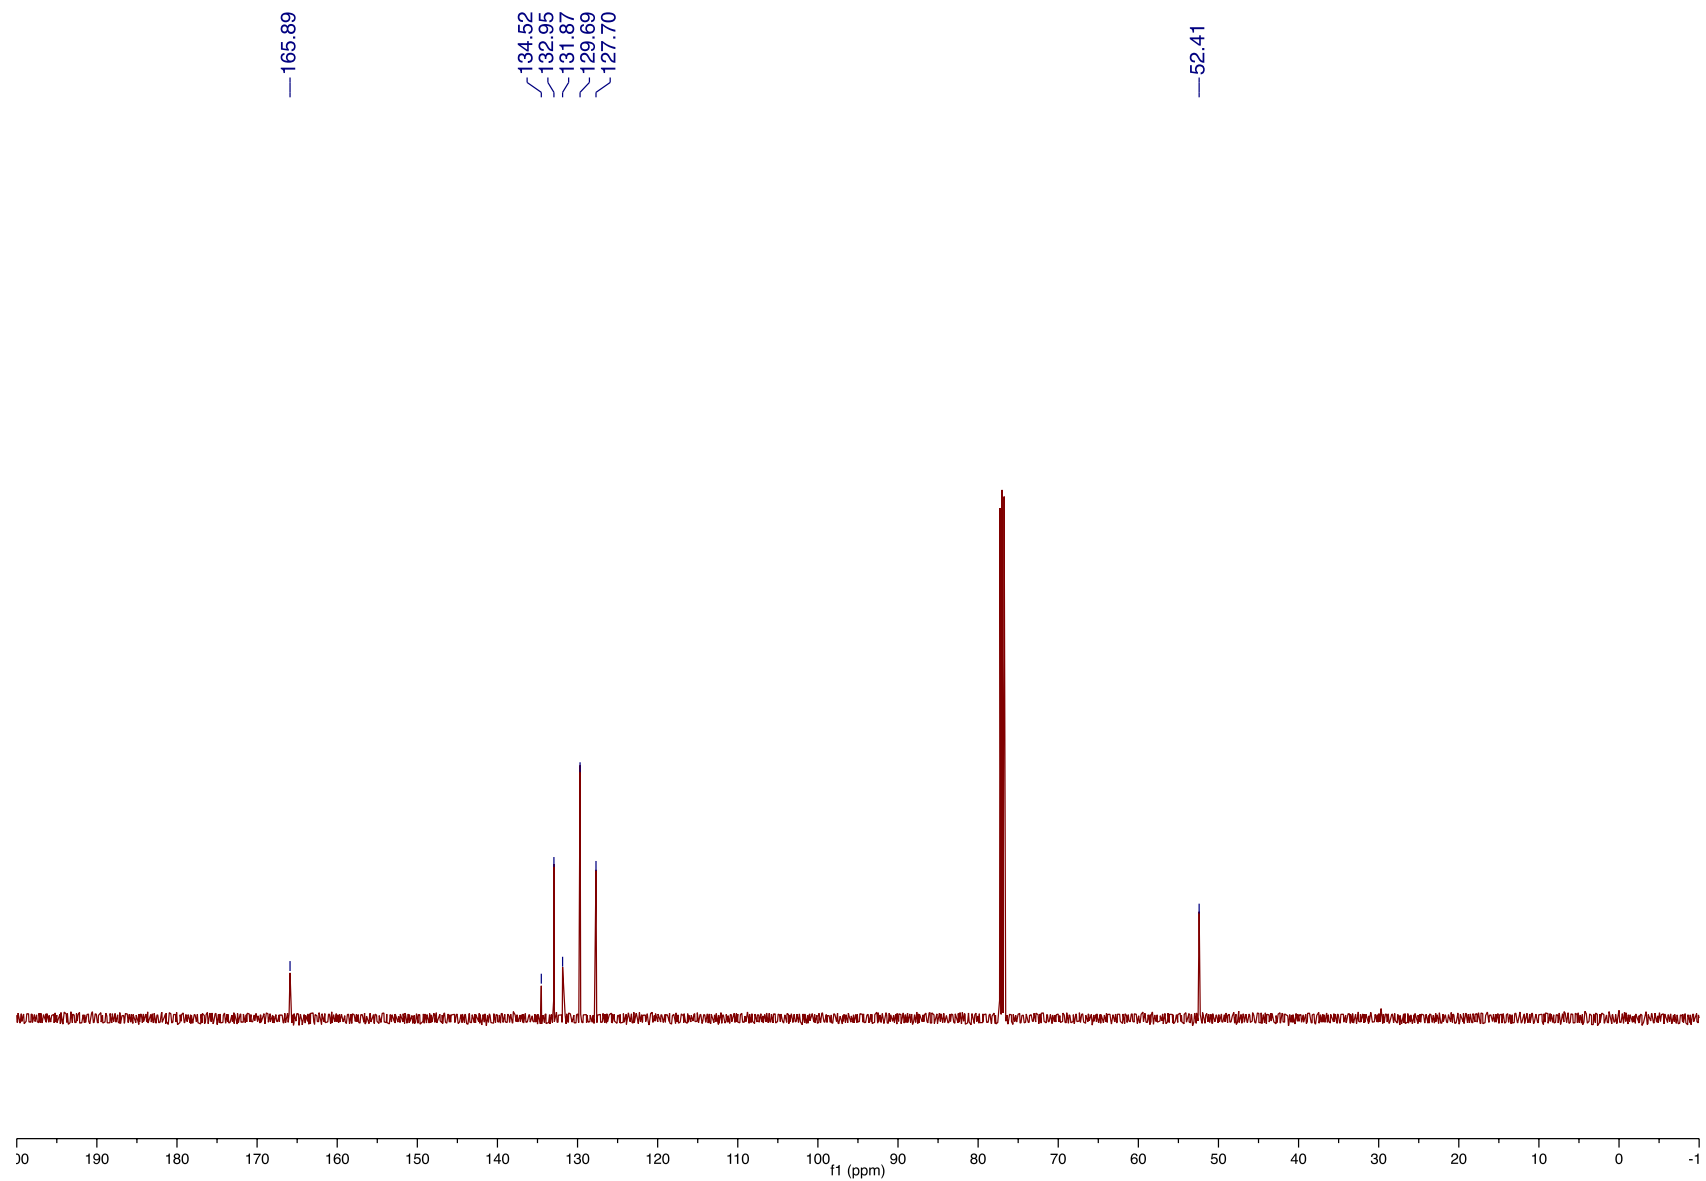

$^1\text{H}$  NMR (500 MHz,  $\text{CDCl}_3$ )

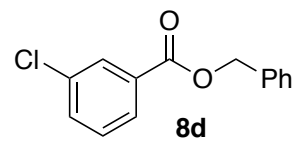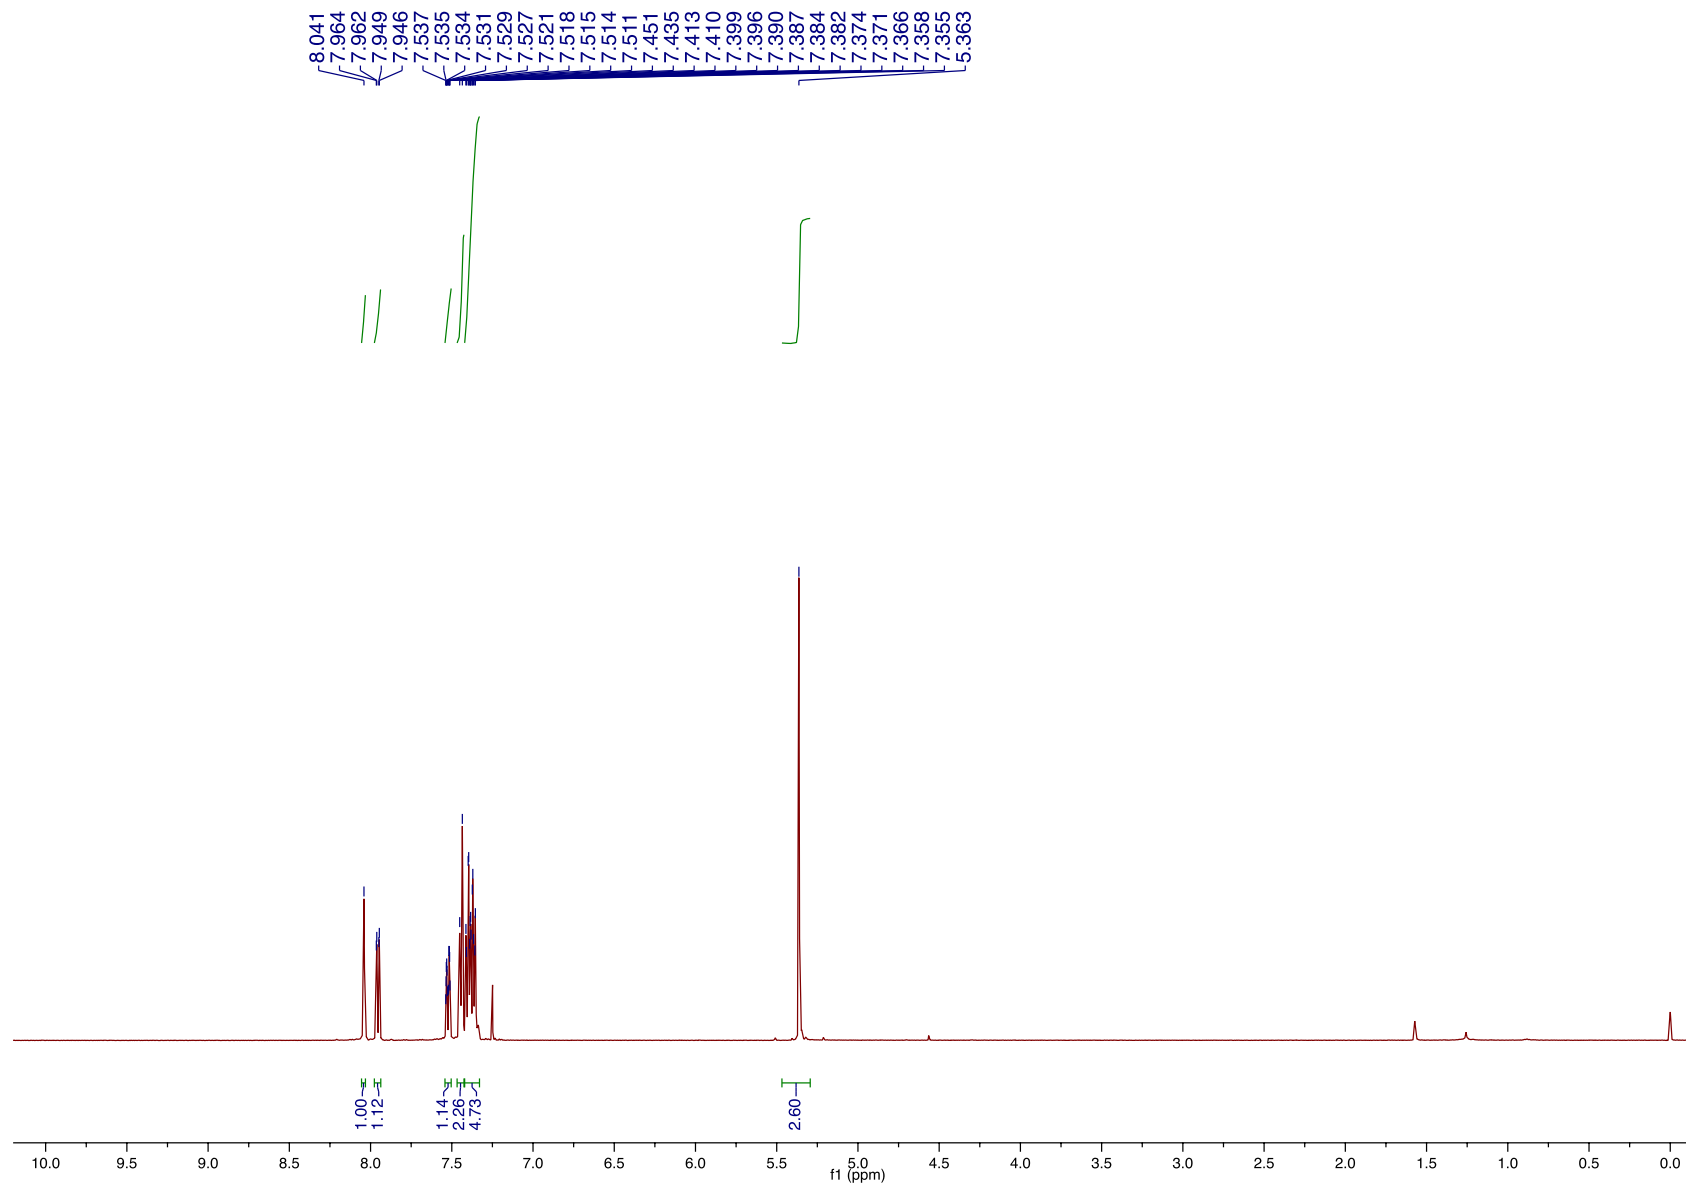

$^{13}\text{C}$  NMR (125 MHz,  $\text{CDCl}_3$ )

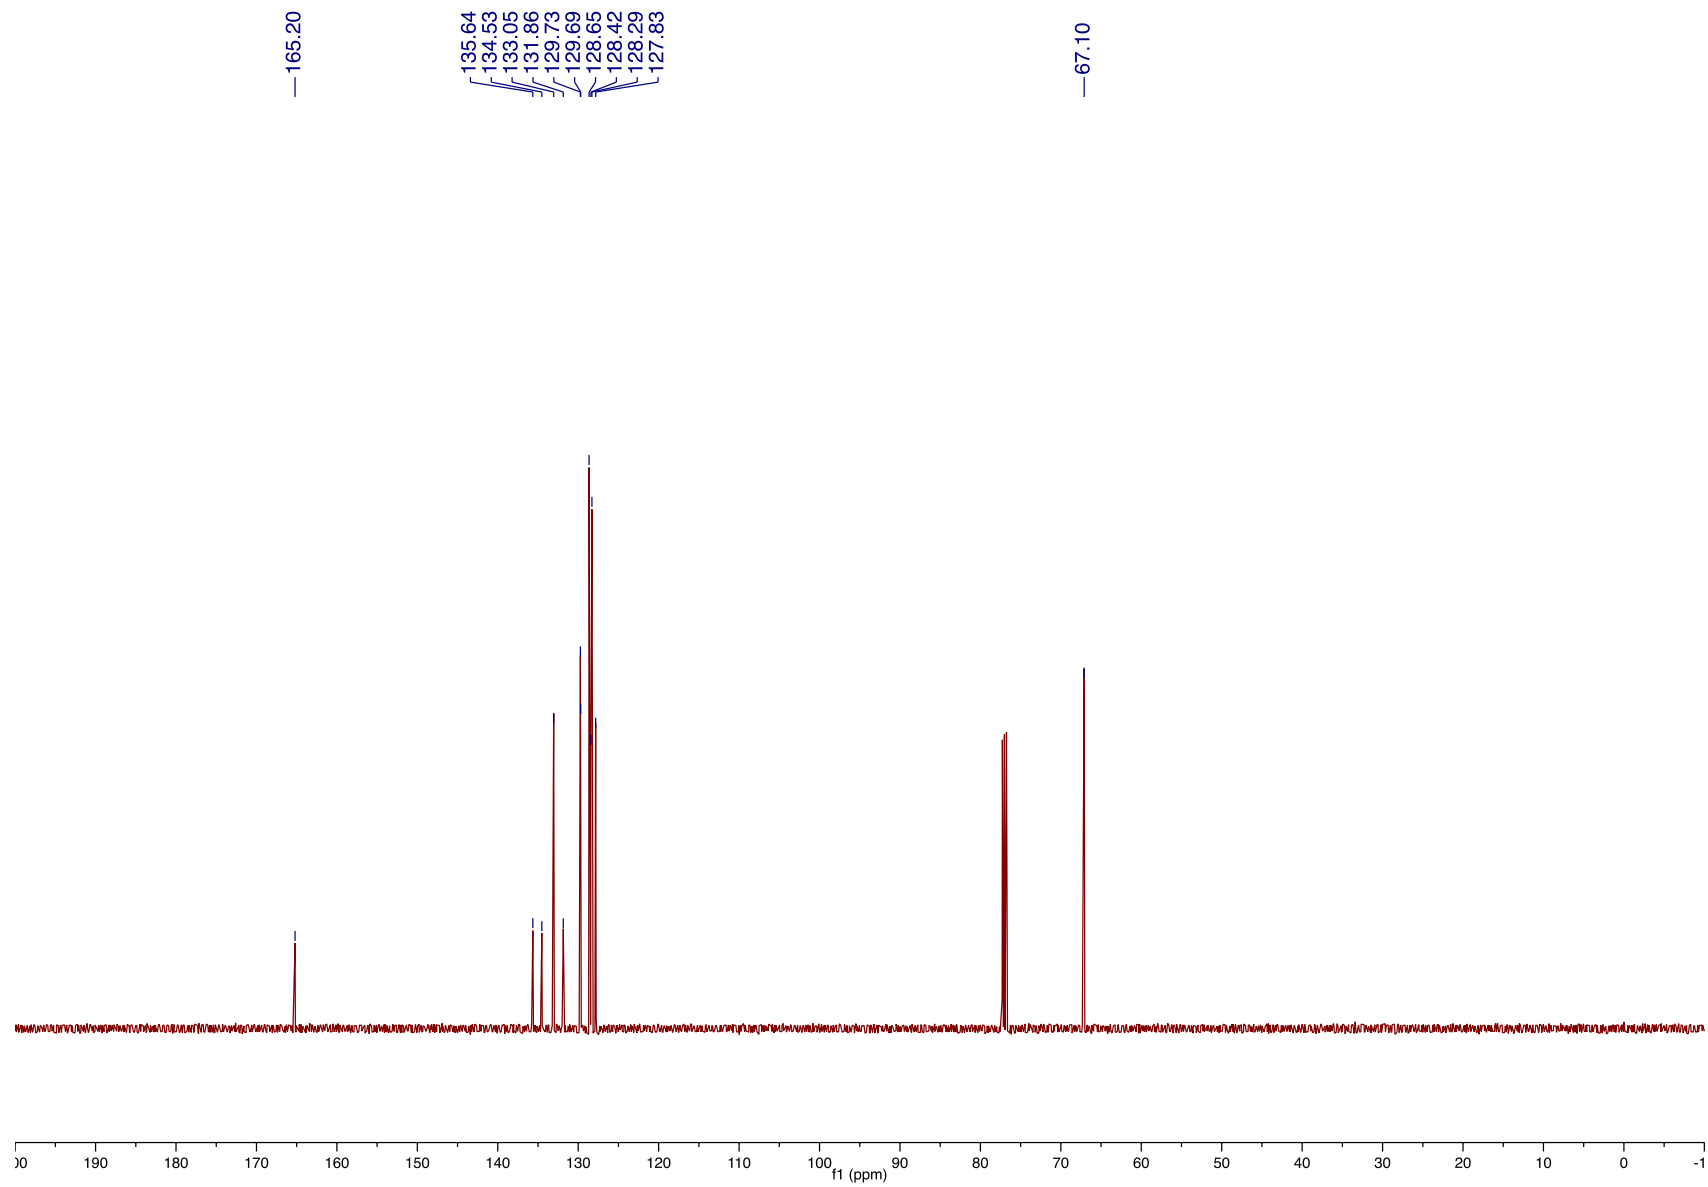

$^1\text{H}$  NMR (500 MHz,  $\text{CDCl}_3$ )

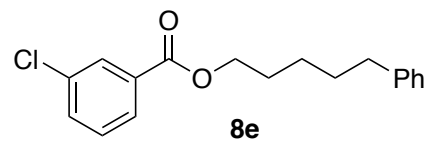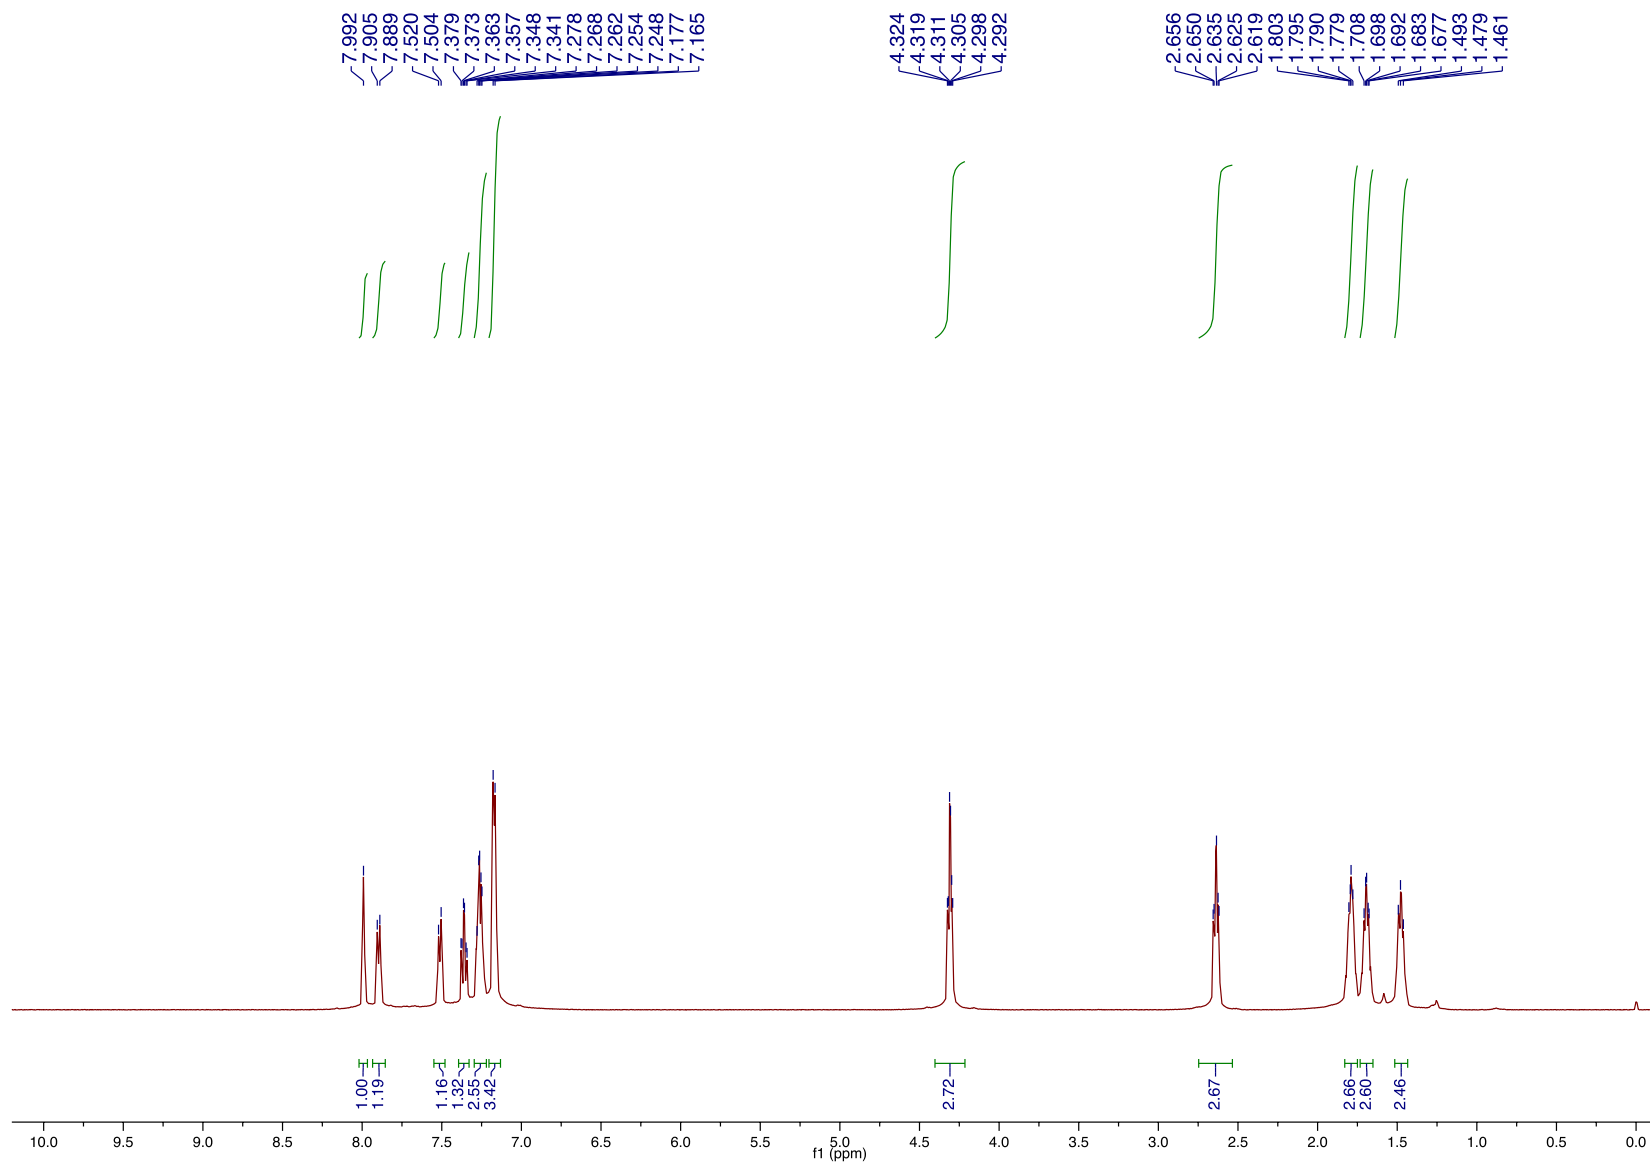

$^{13}\text{C}$  NMR (125 MHz,  $\text{CDCl}_3$ )

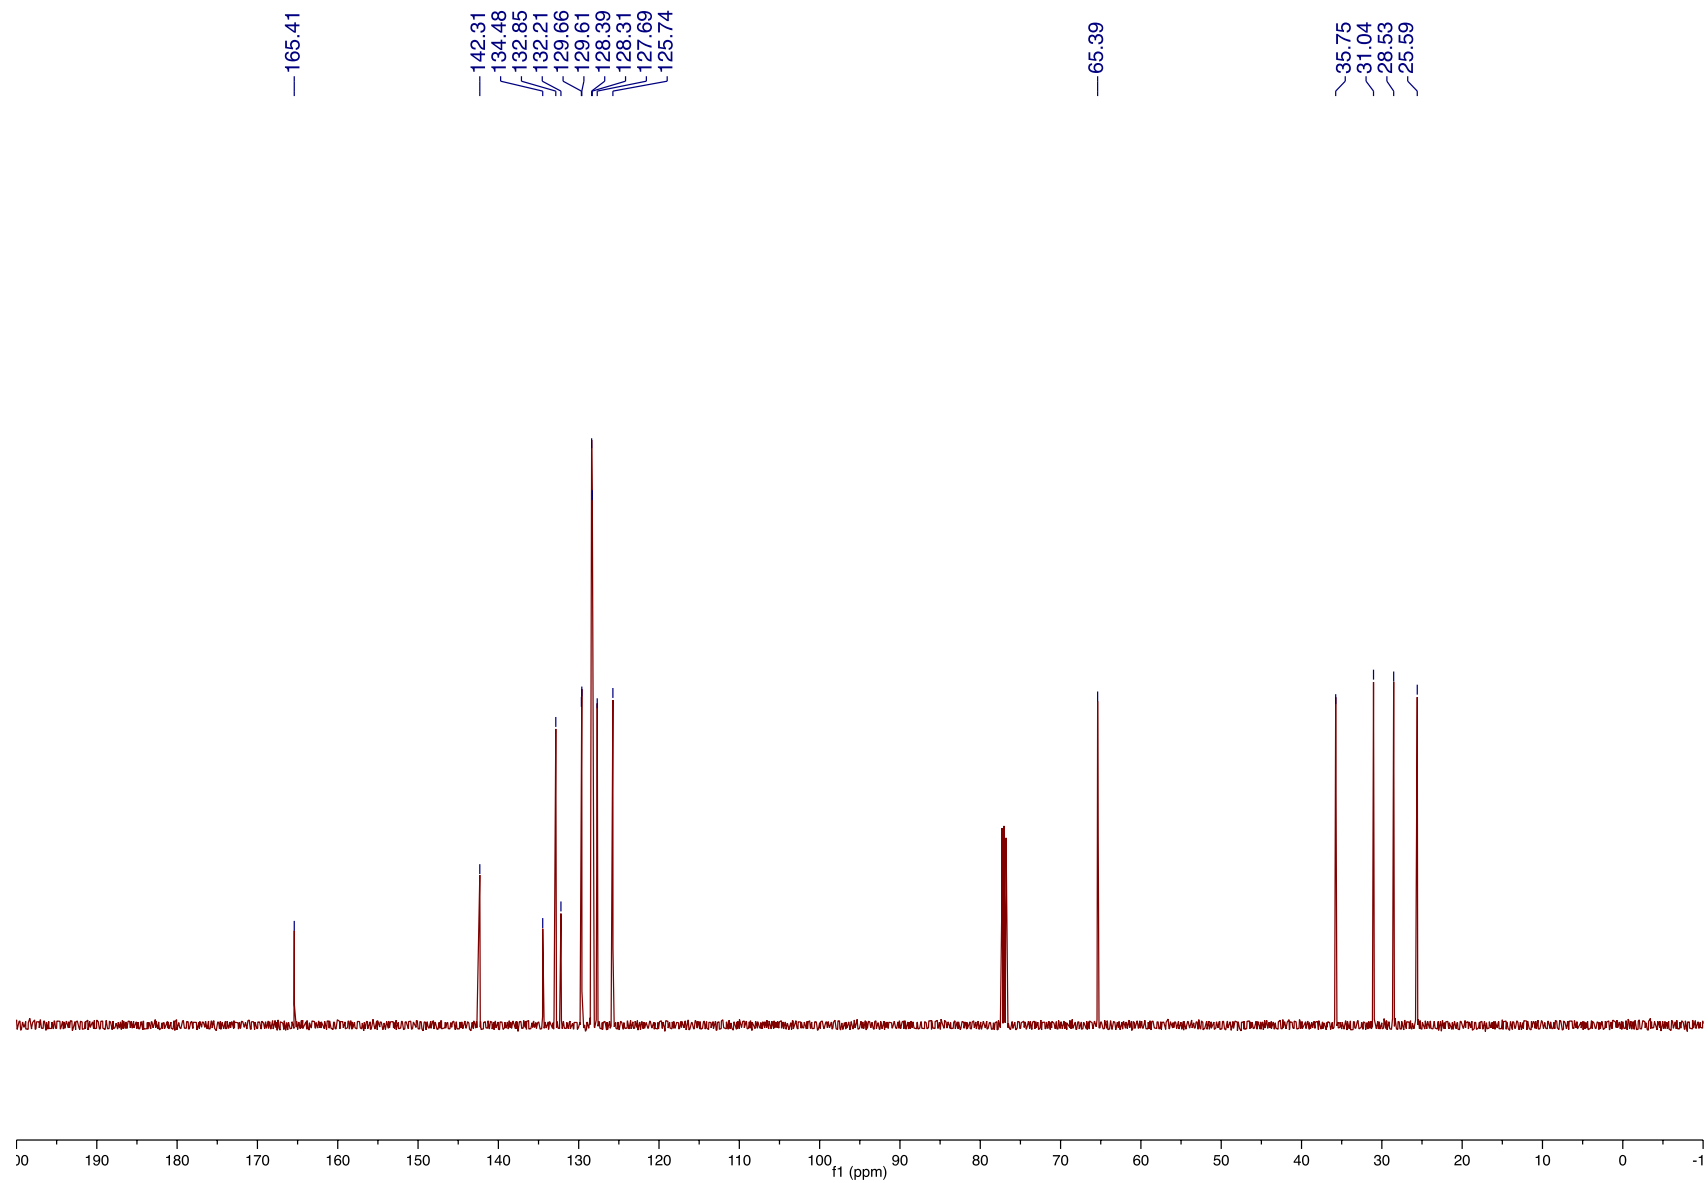

$^1\text{H}$  NMR (500 MHz,  $\text{CDCl}_3$ )

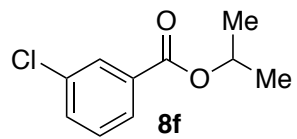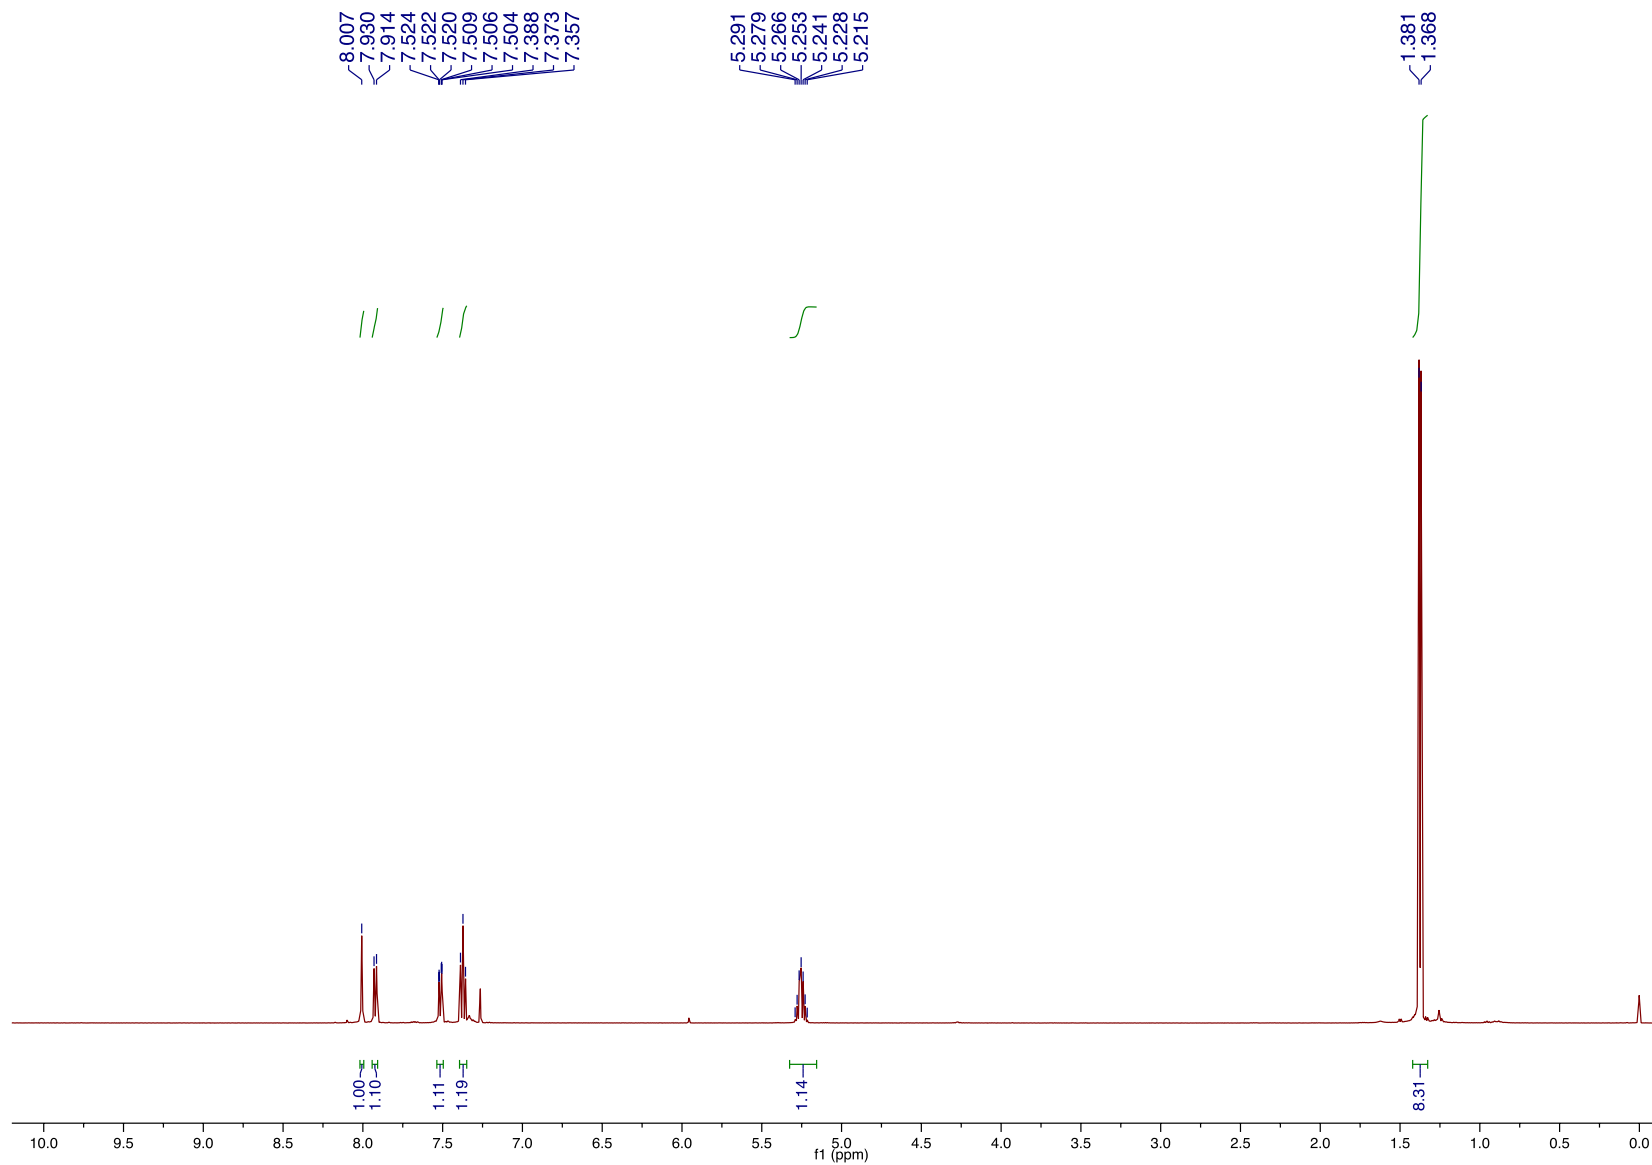



$^1\text{H}$  NMR (500 MHz,  $\text{CDCl}_3$ )

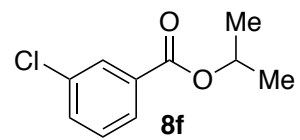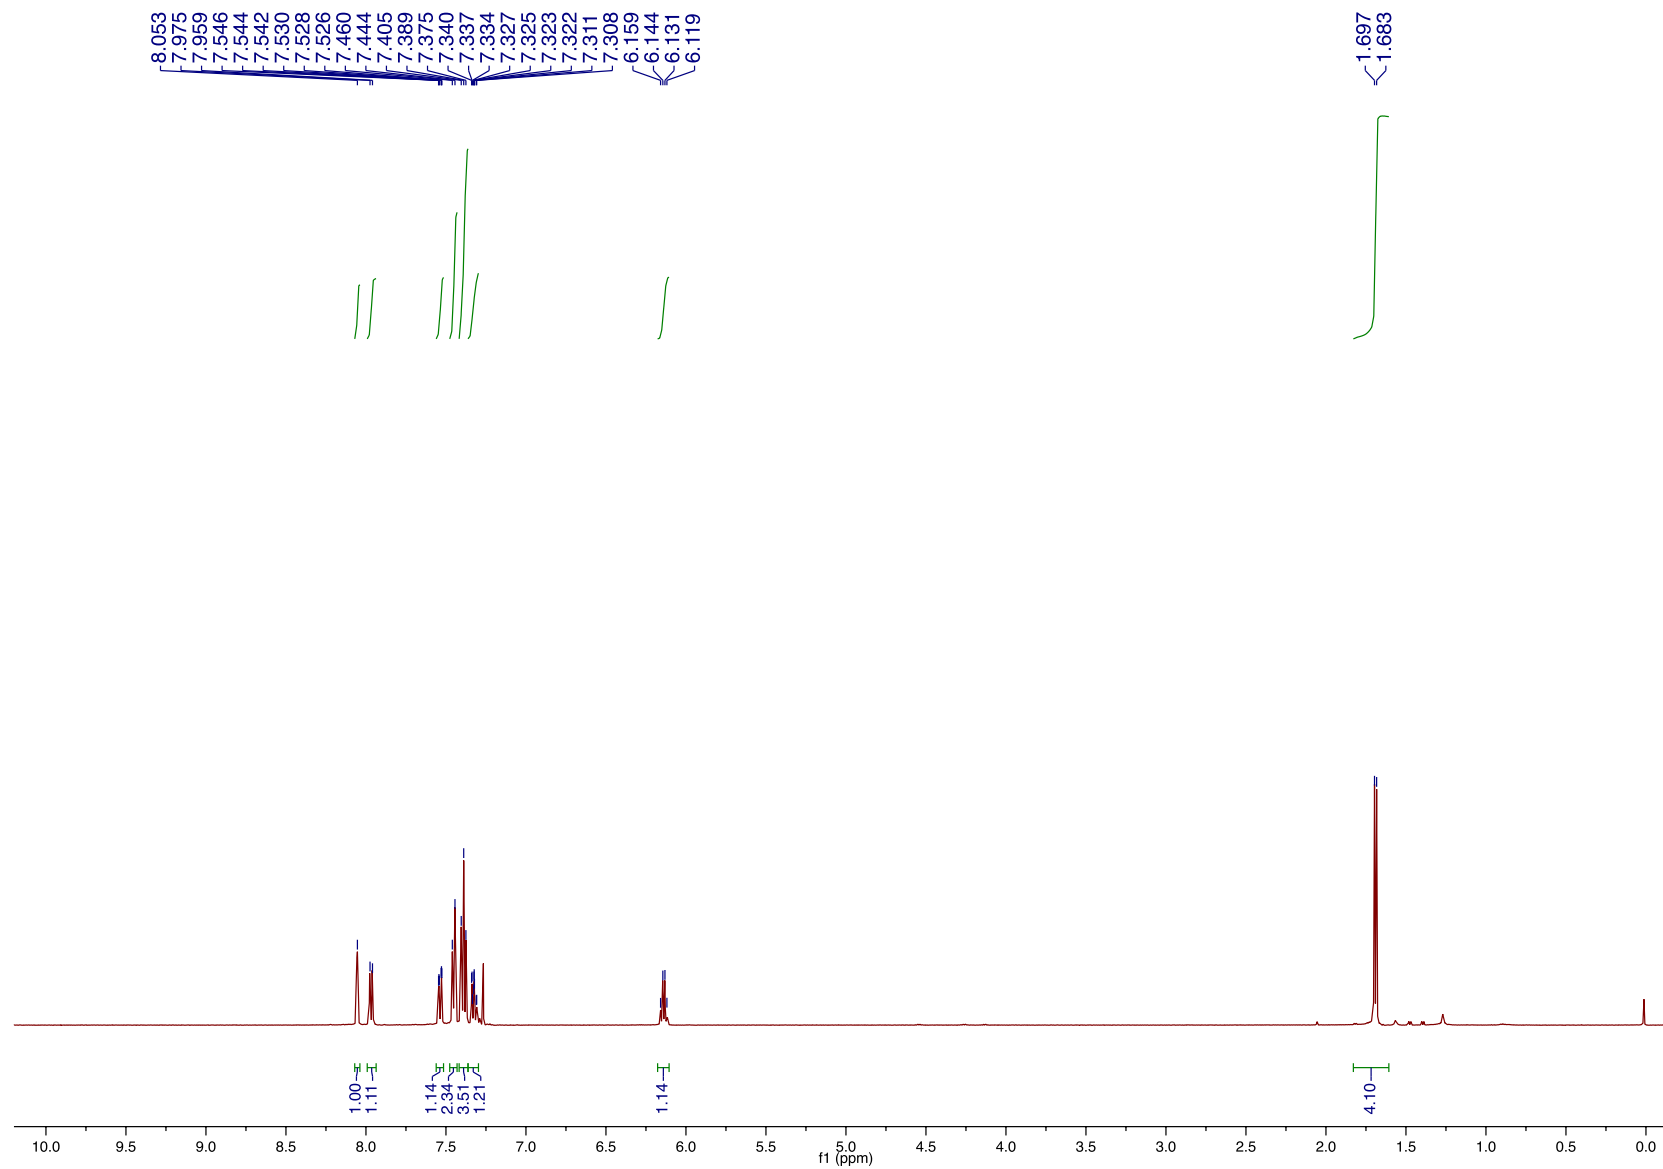

$^{13}\text{C}$  NMR (125 MHz,  $\text{CDCl}_3$ )

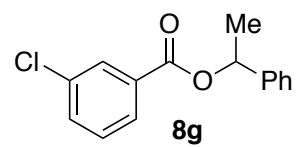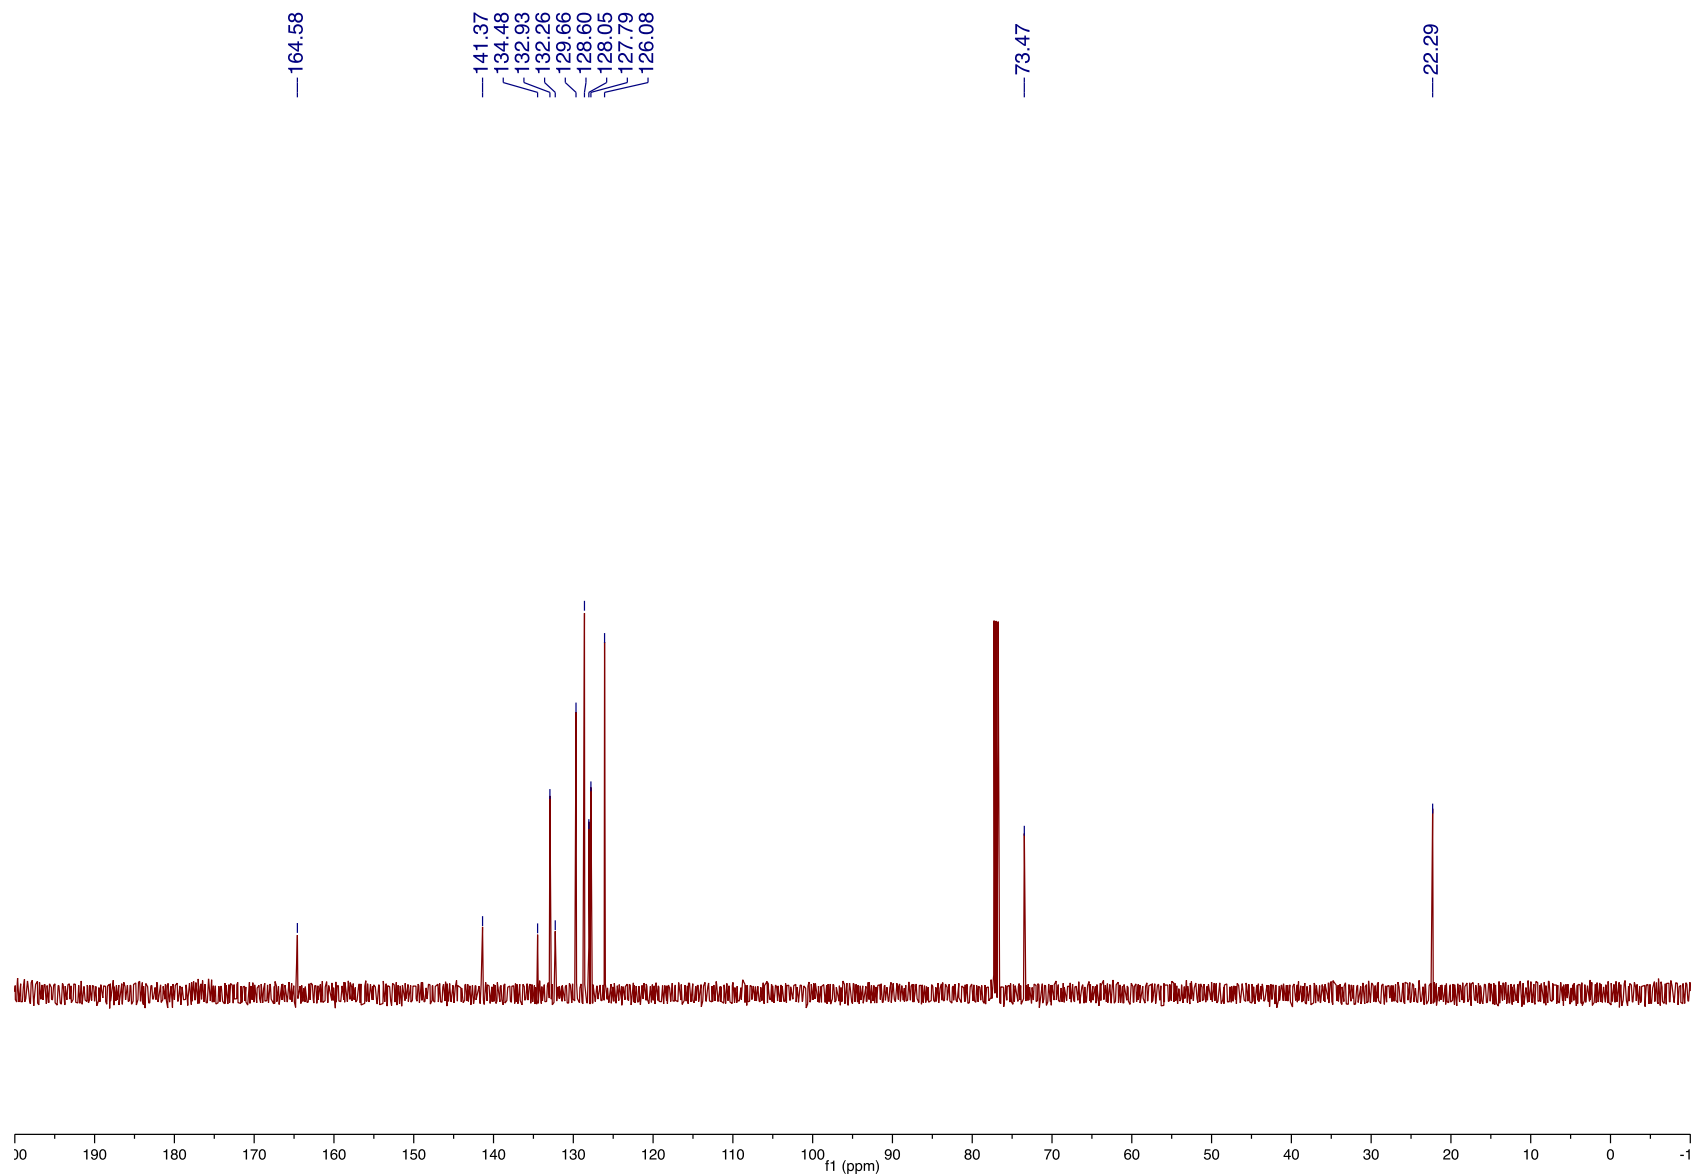

$^1\text{H}$  NMR (500 MHz,  $\text{CDCl}_3$ )

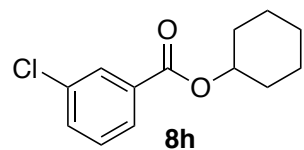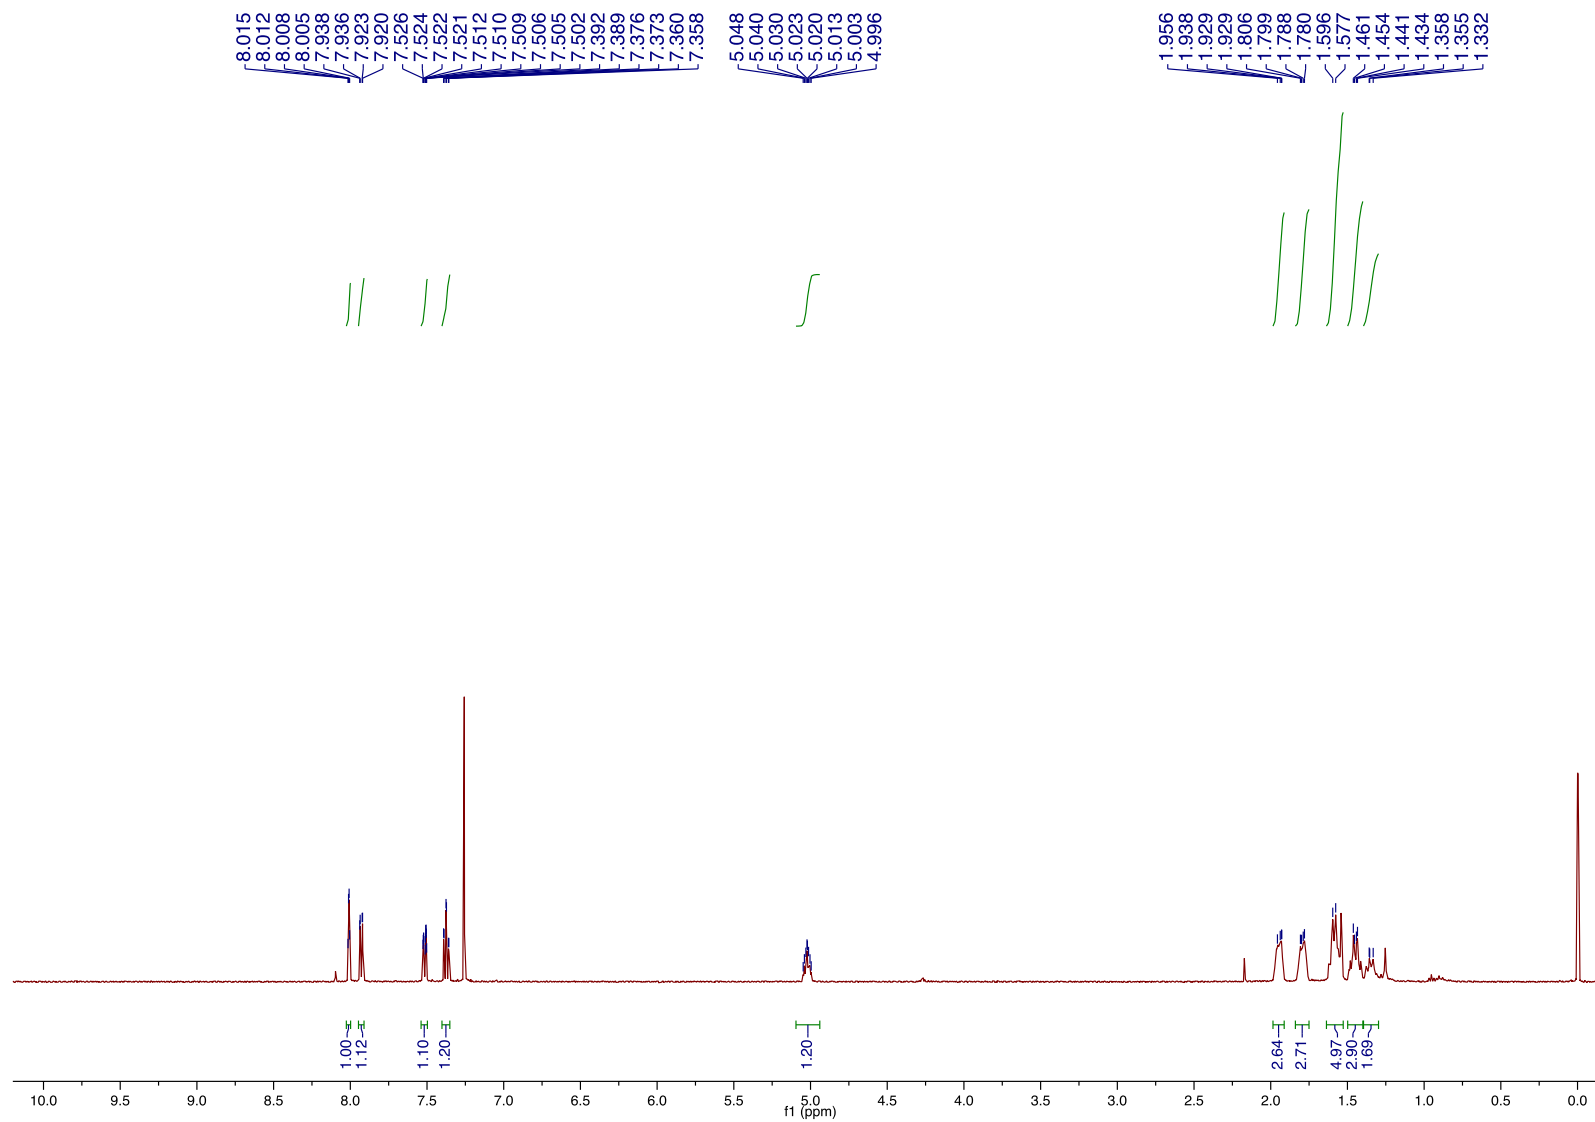

$^{13}\text{C}$  NMR (125 MHz,  $\text{CDCl}_3$ )

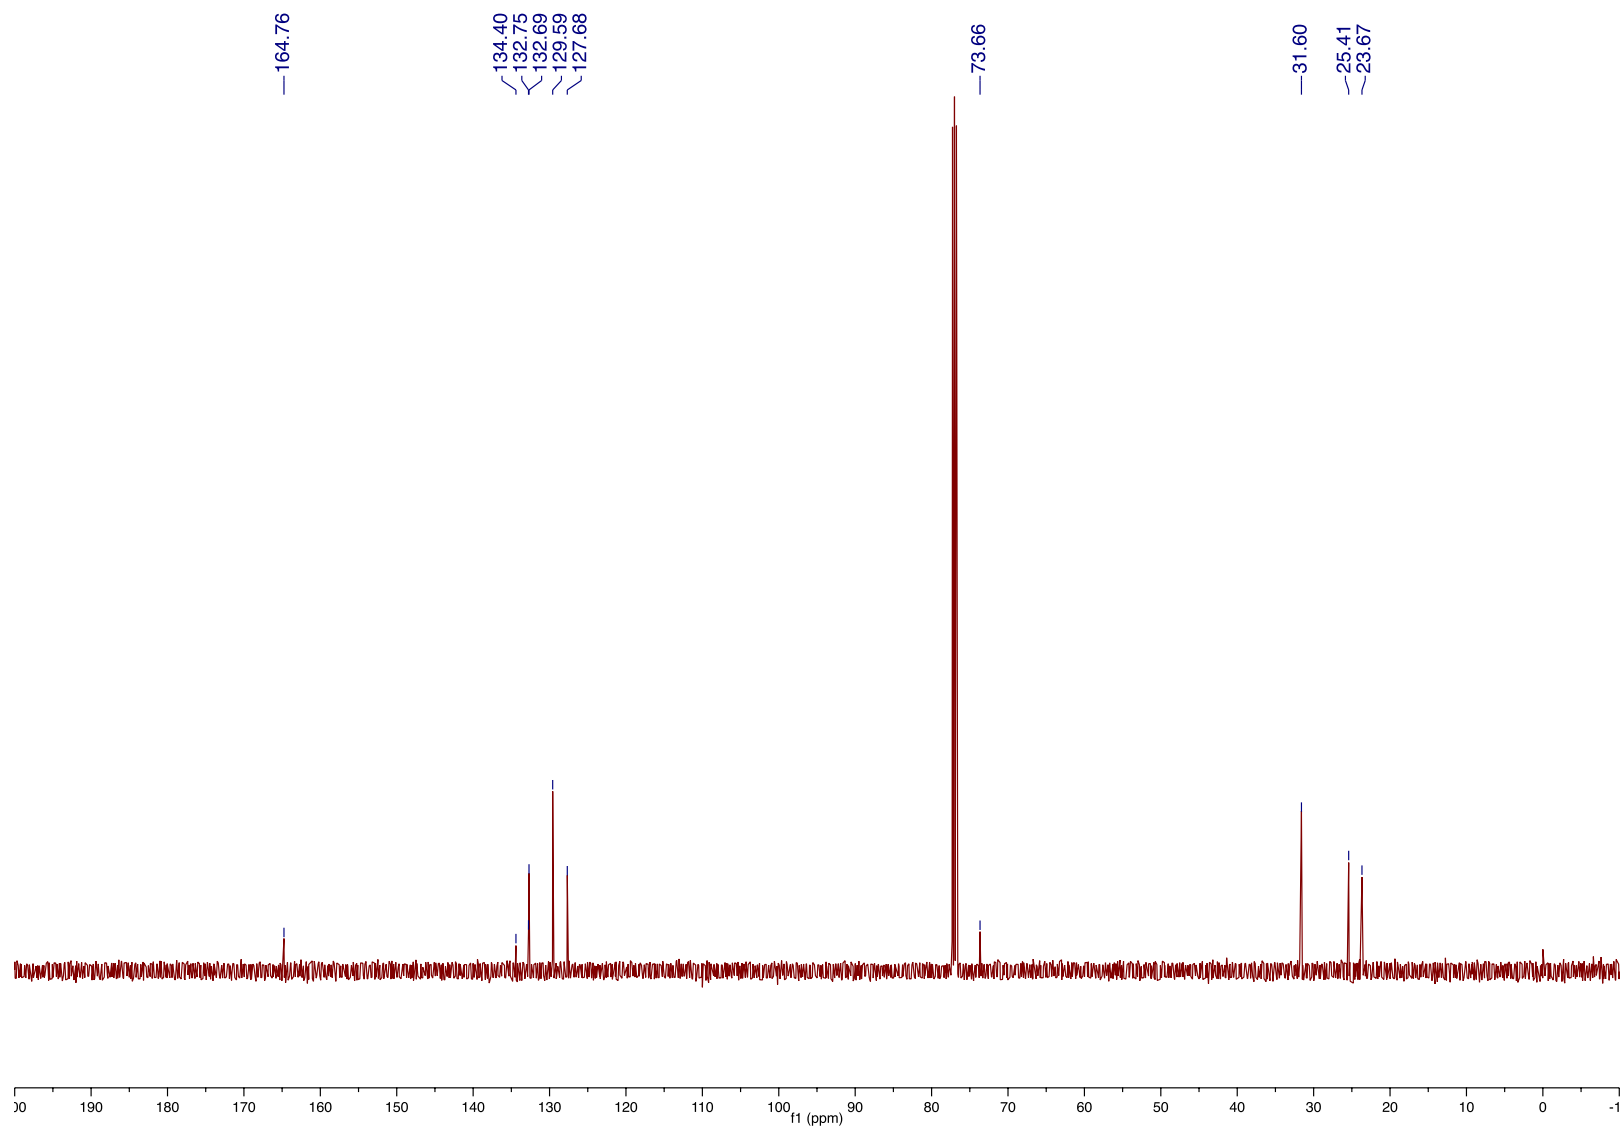

$^1\text{H}$  NMR (500 MHz,  $\text{CDCl}_3$ )

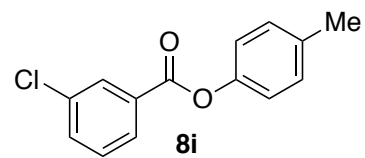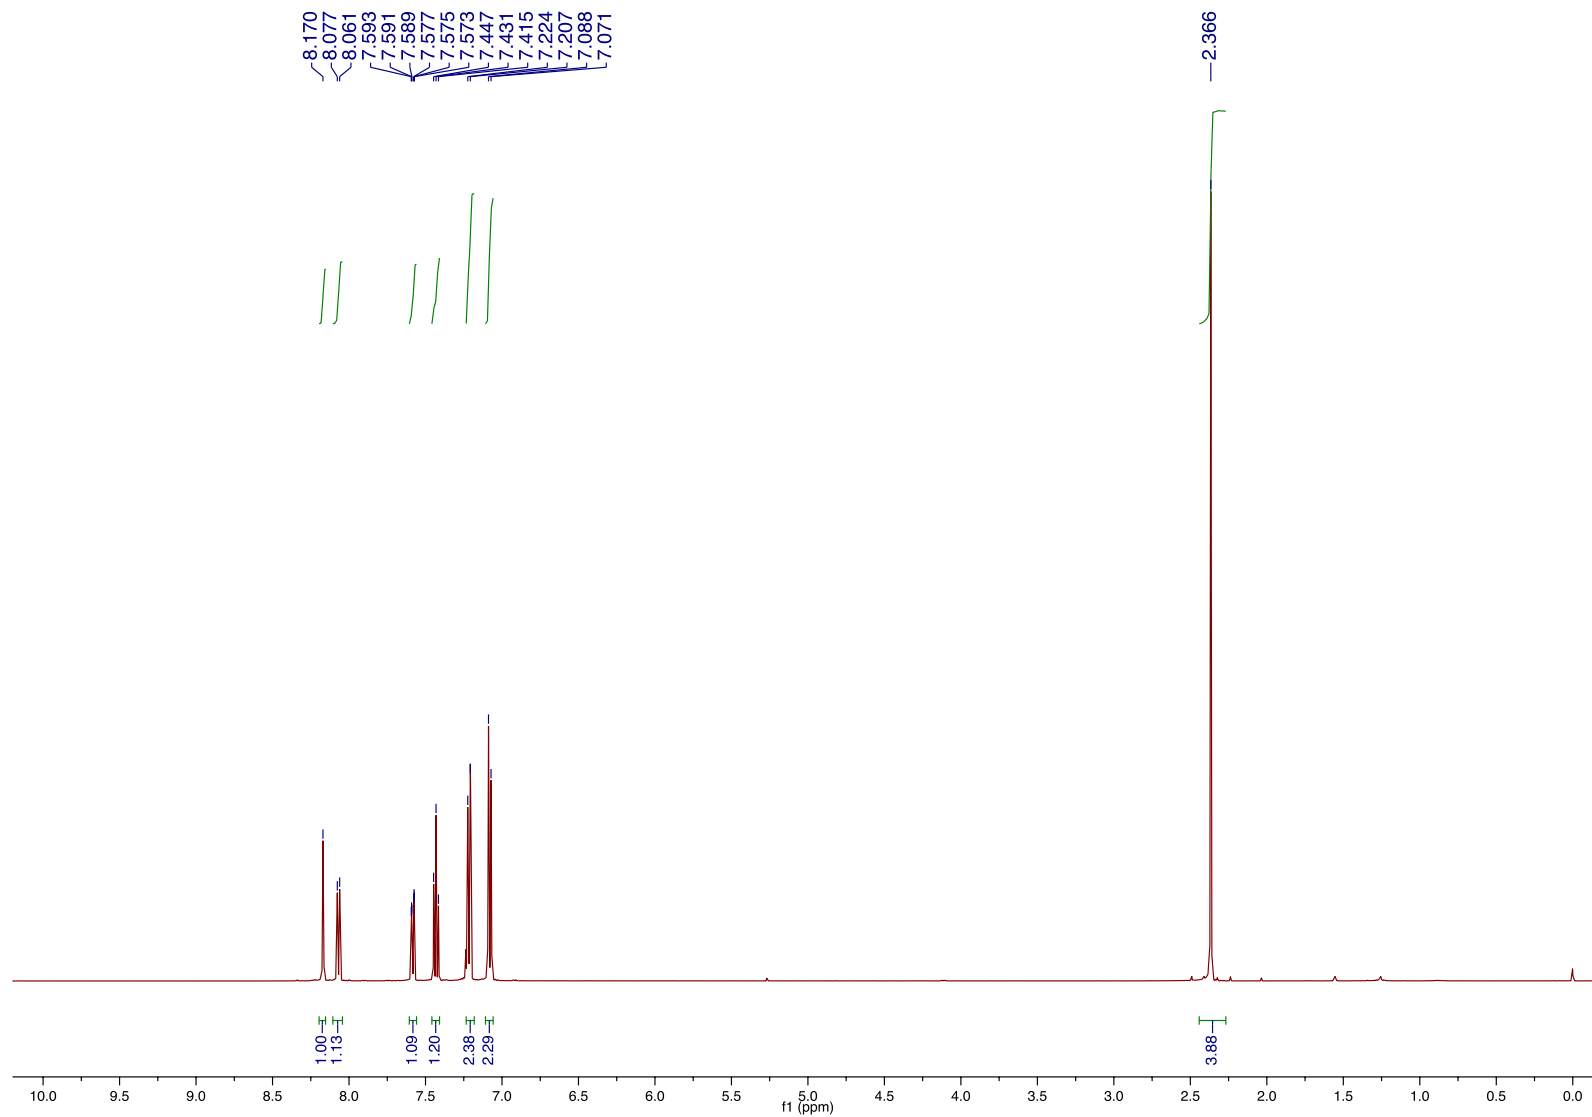

$^{13}\text{C}$  NMR (125 MHz,  $\text{CDCl}_3$ )

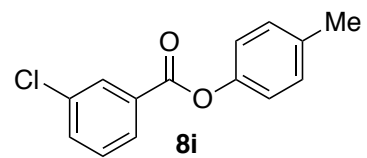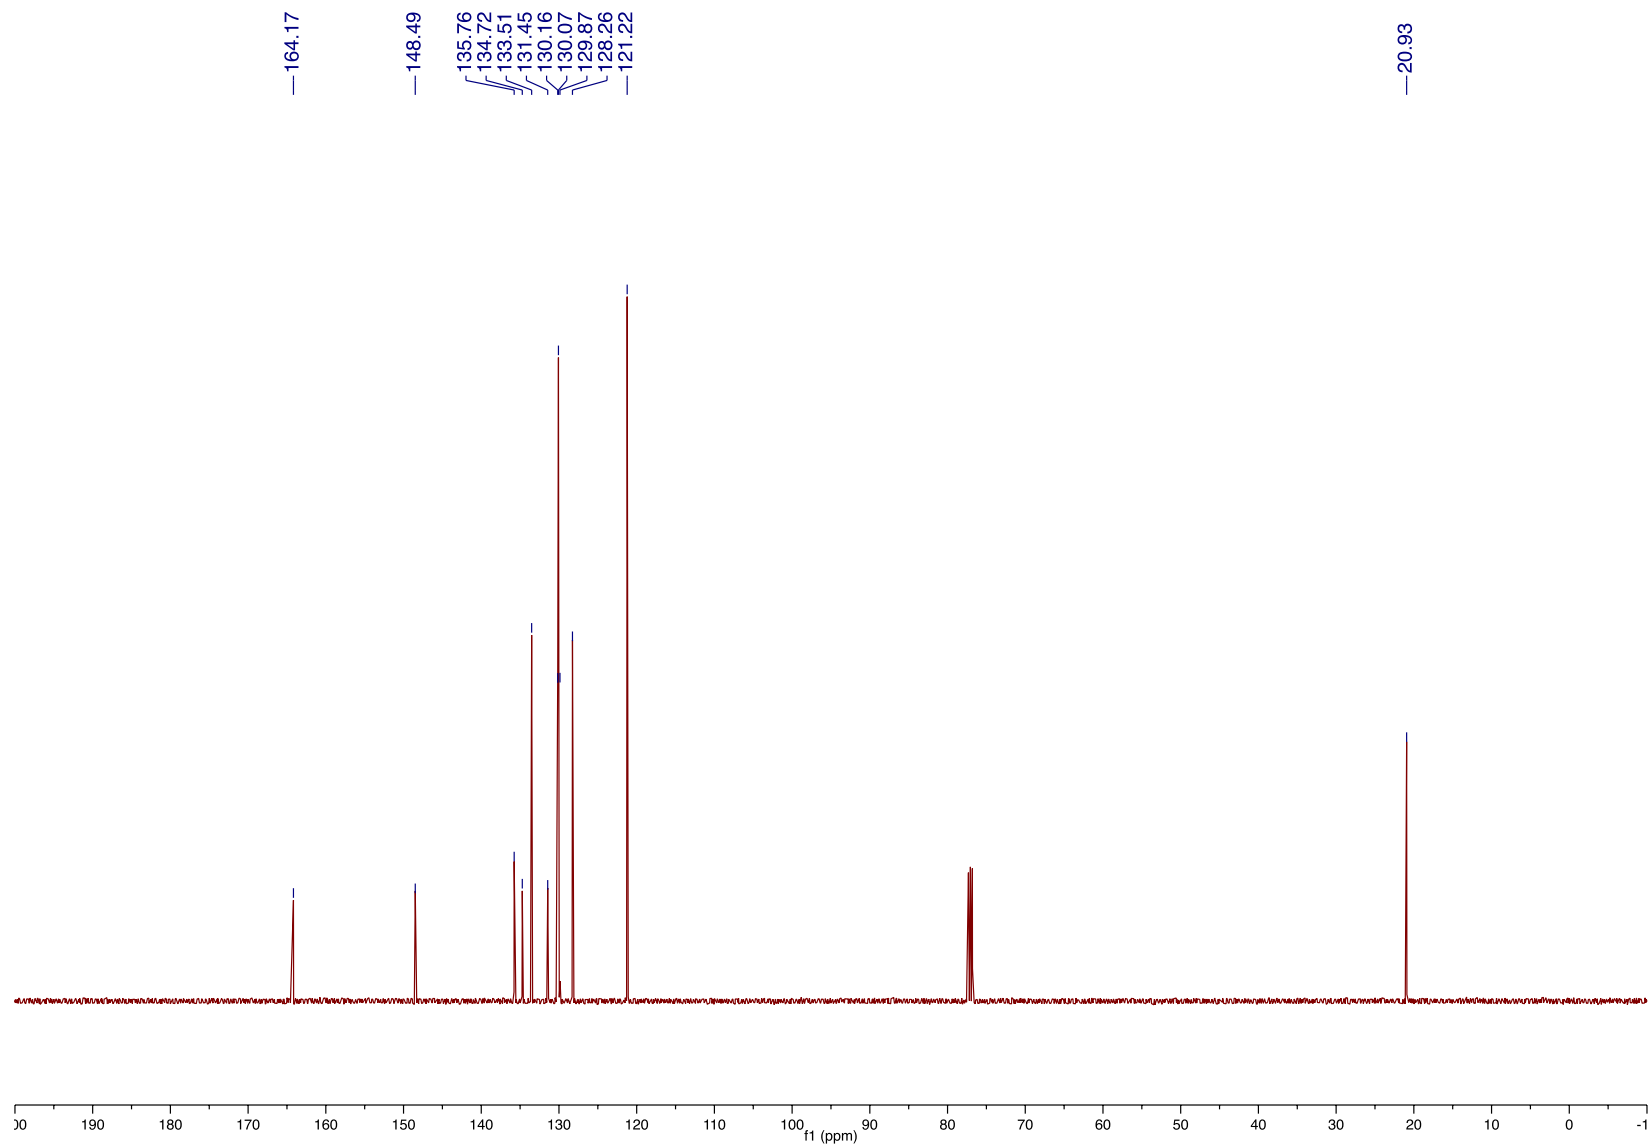

$^1\text{H}$  NMR (400 MHz,  $\text{CDCl}_3$ )

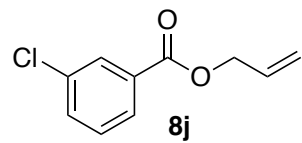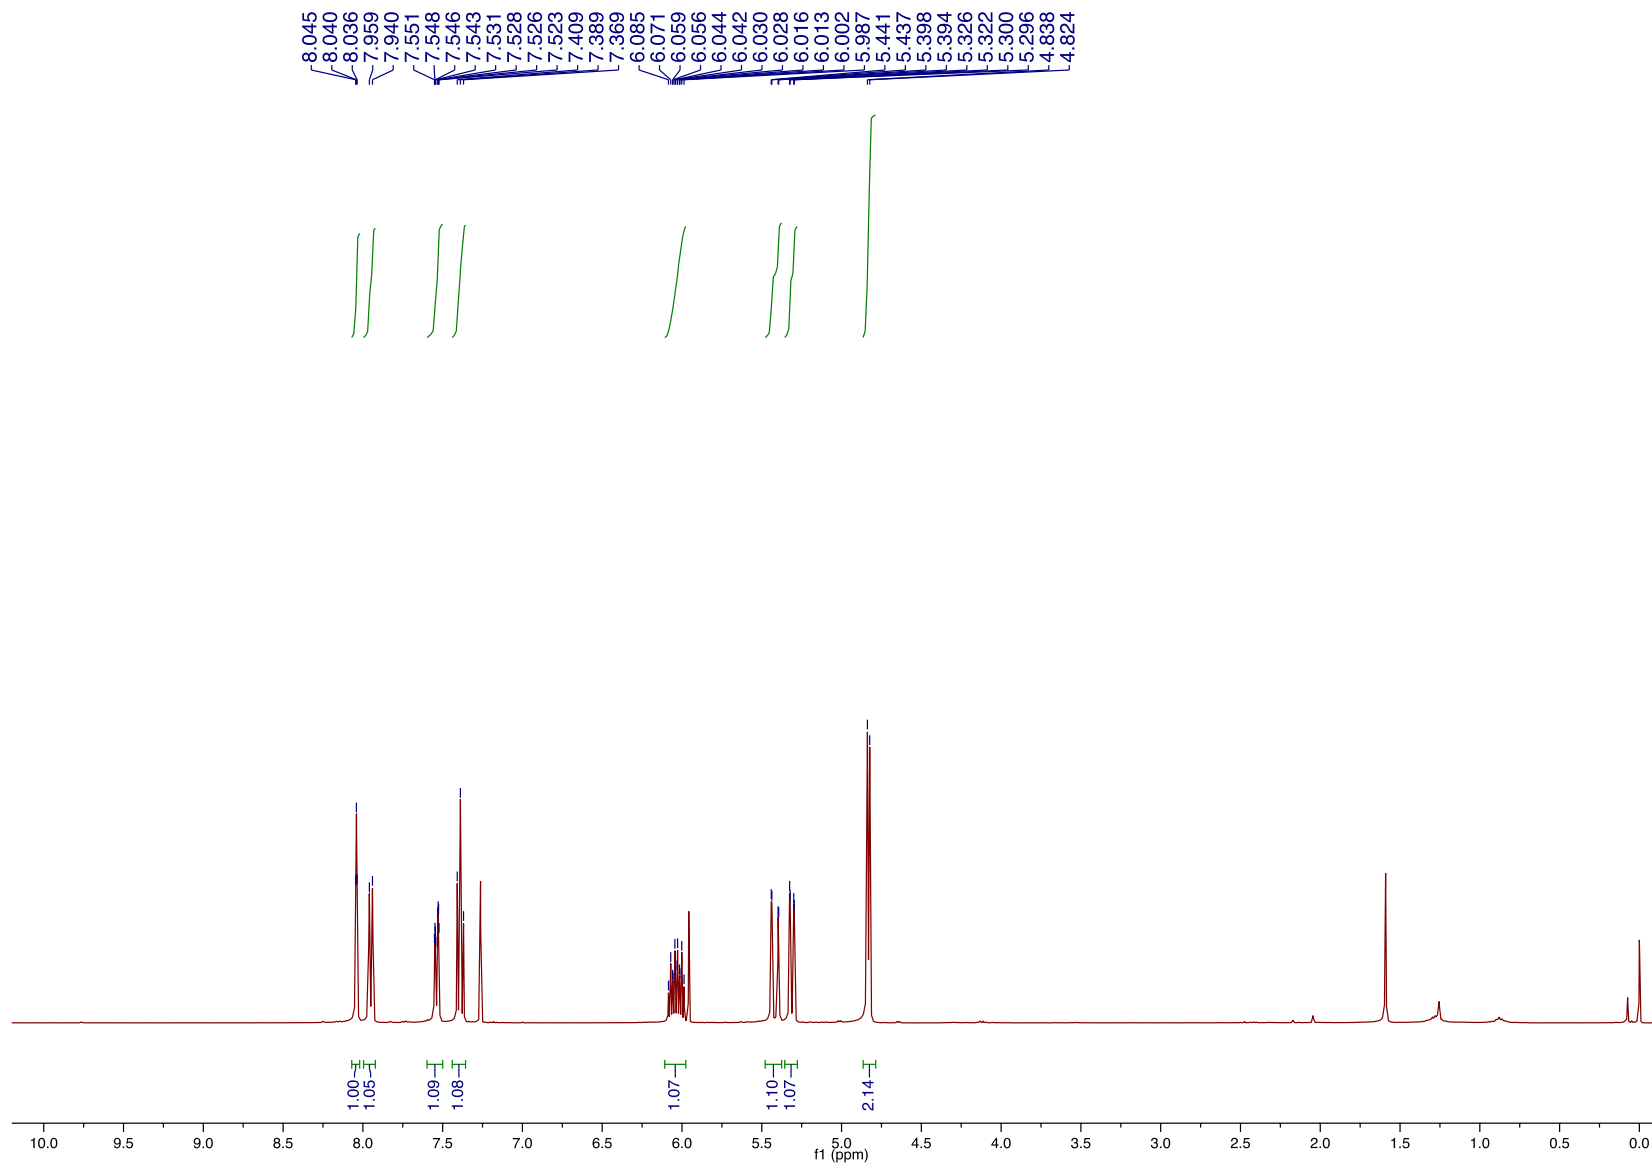

$^{13}\text{C}$  NMR (100 MHz,  $\text{CDCl}_3$ )

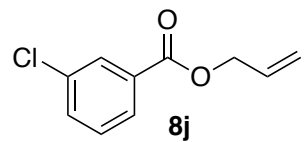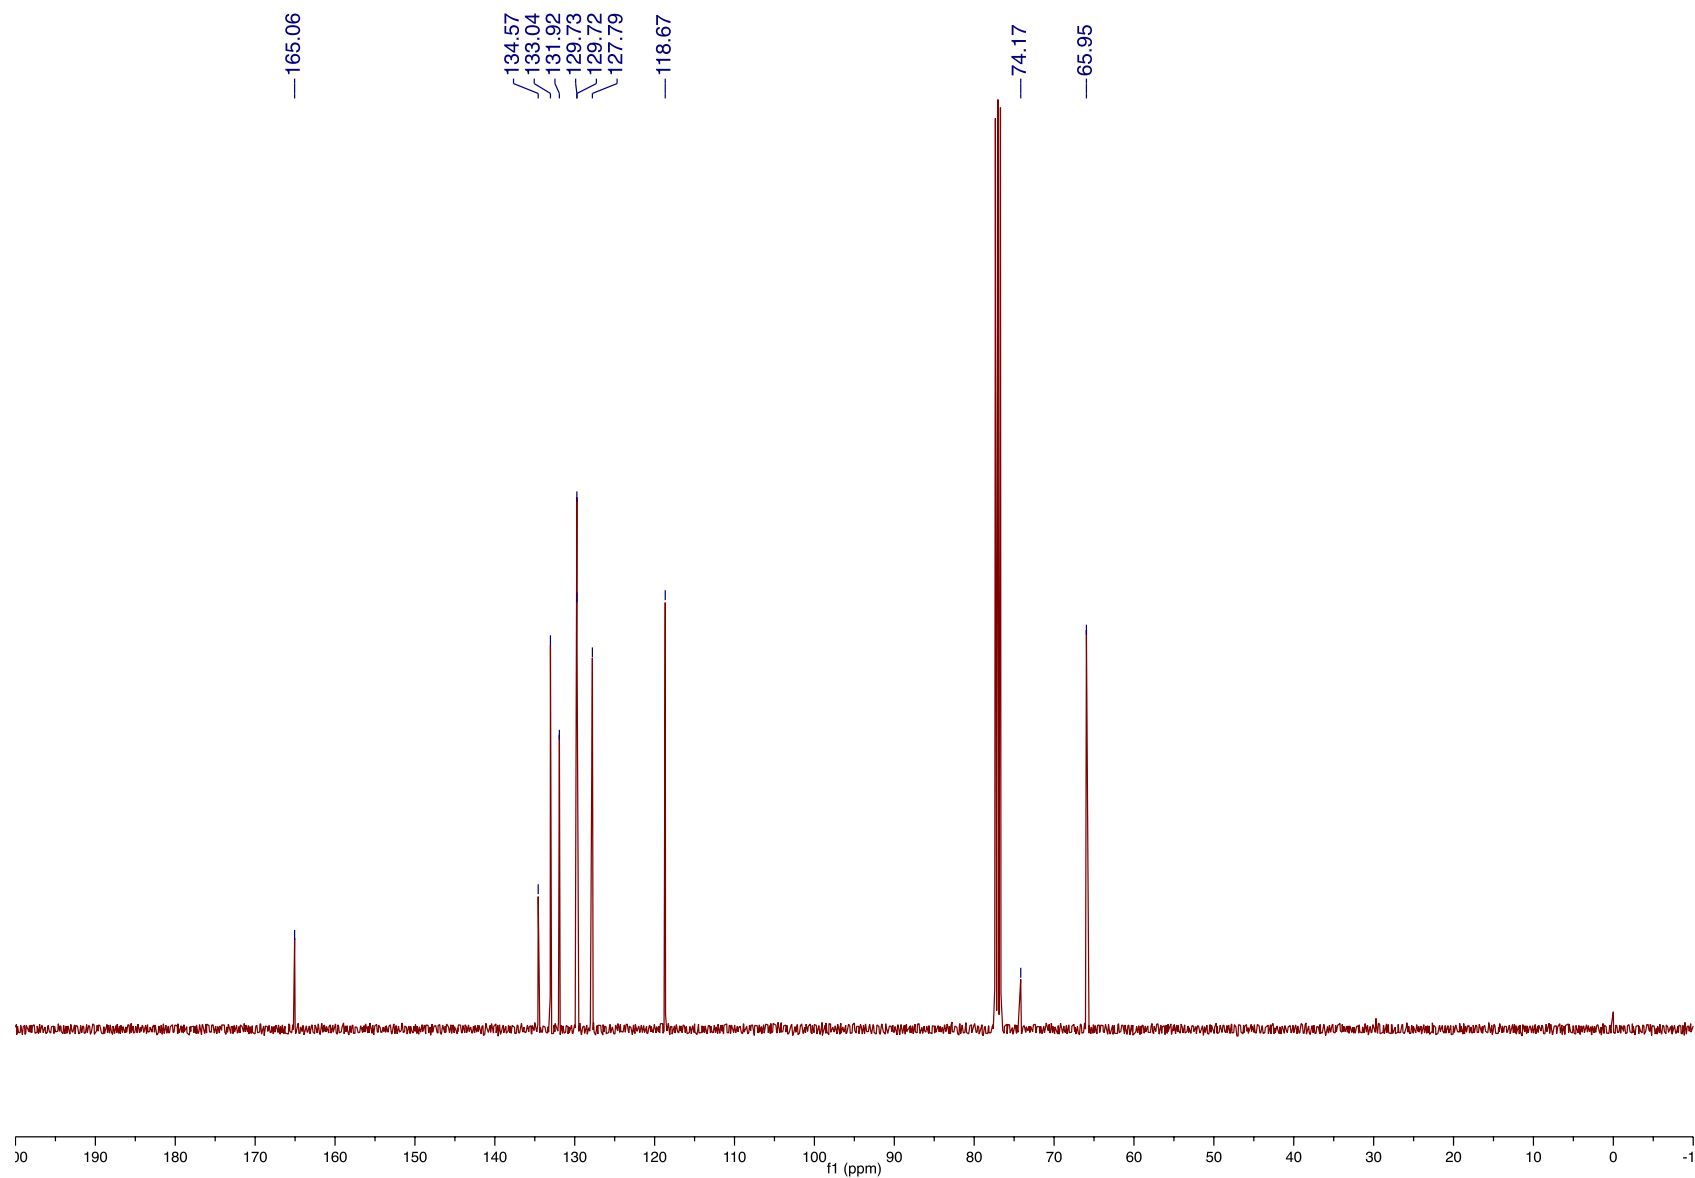



$^1\text{H}$  NMR (400 MHz,  $\text{CDCl}_3$ )

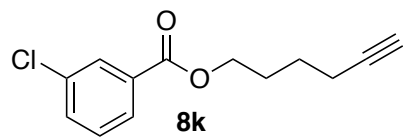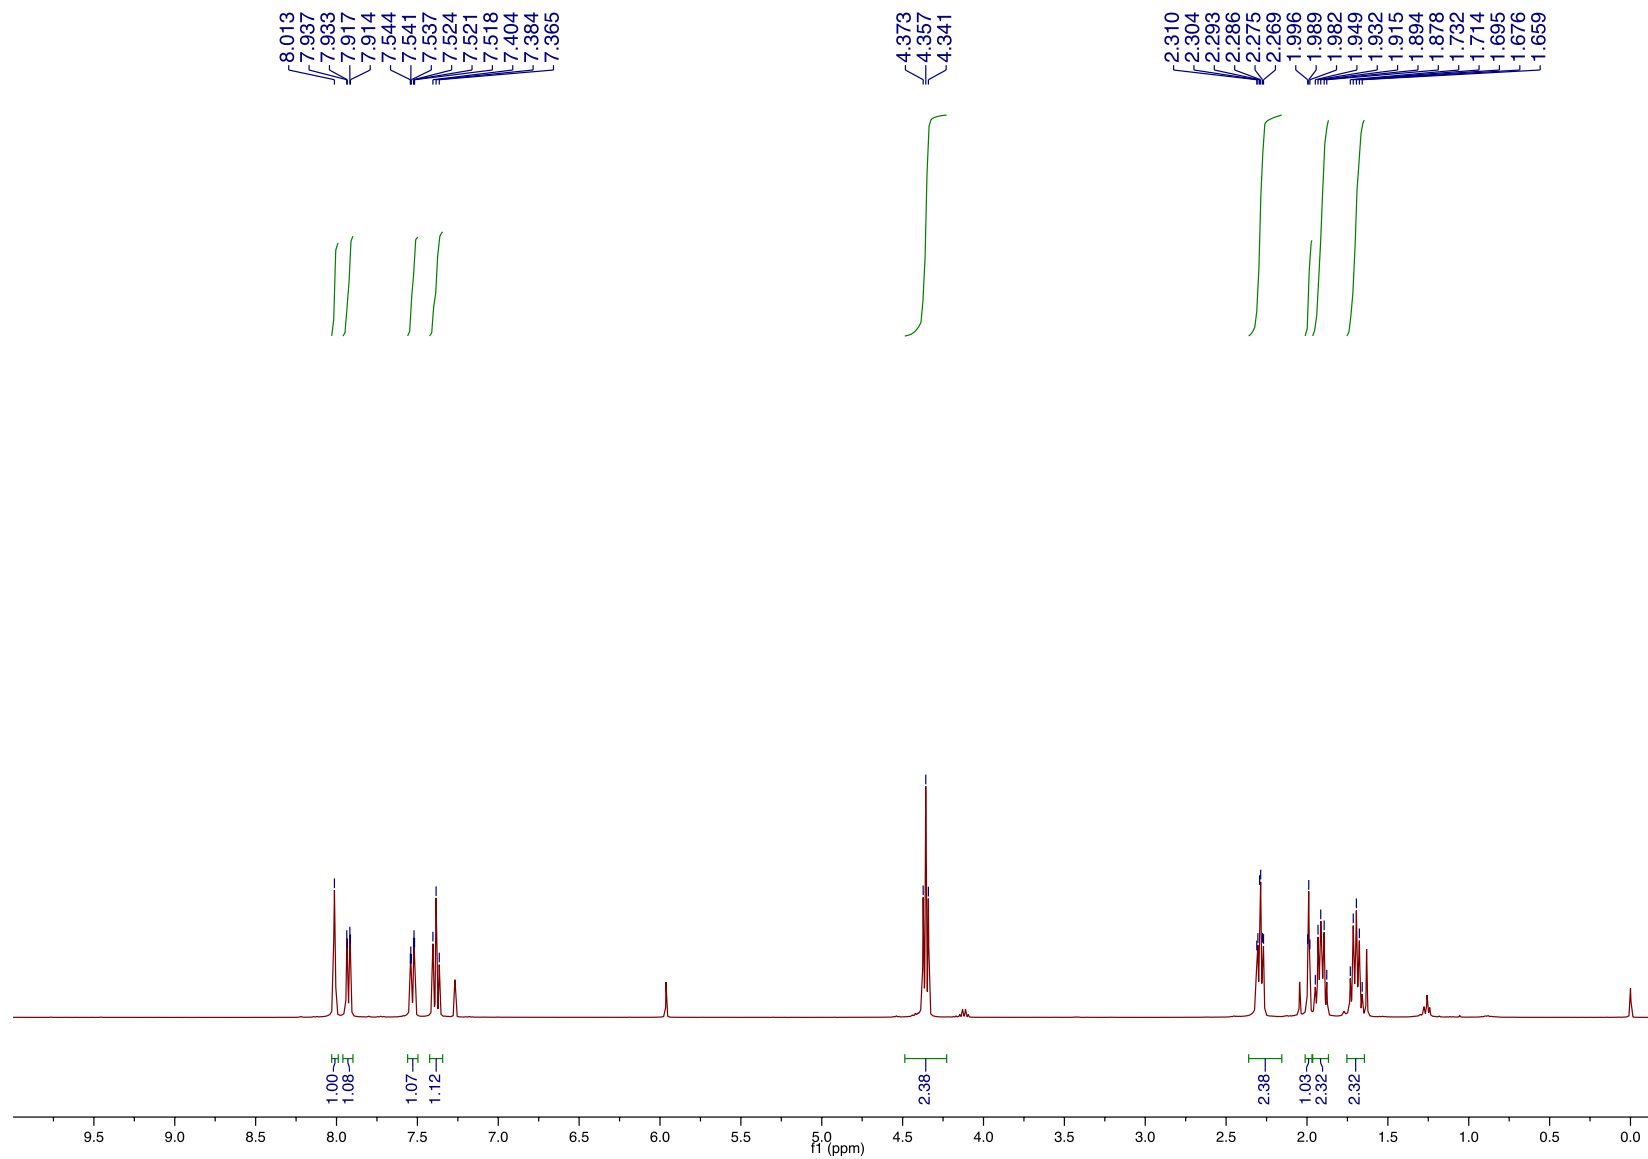

$^{13}\text{C}$  NMR (100 MHz,  $\text{CDCl}_3$ )

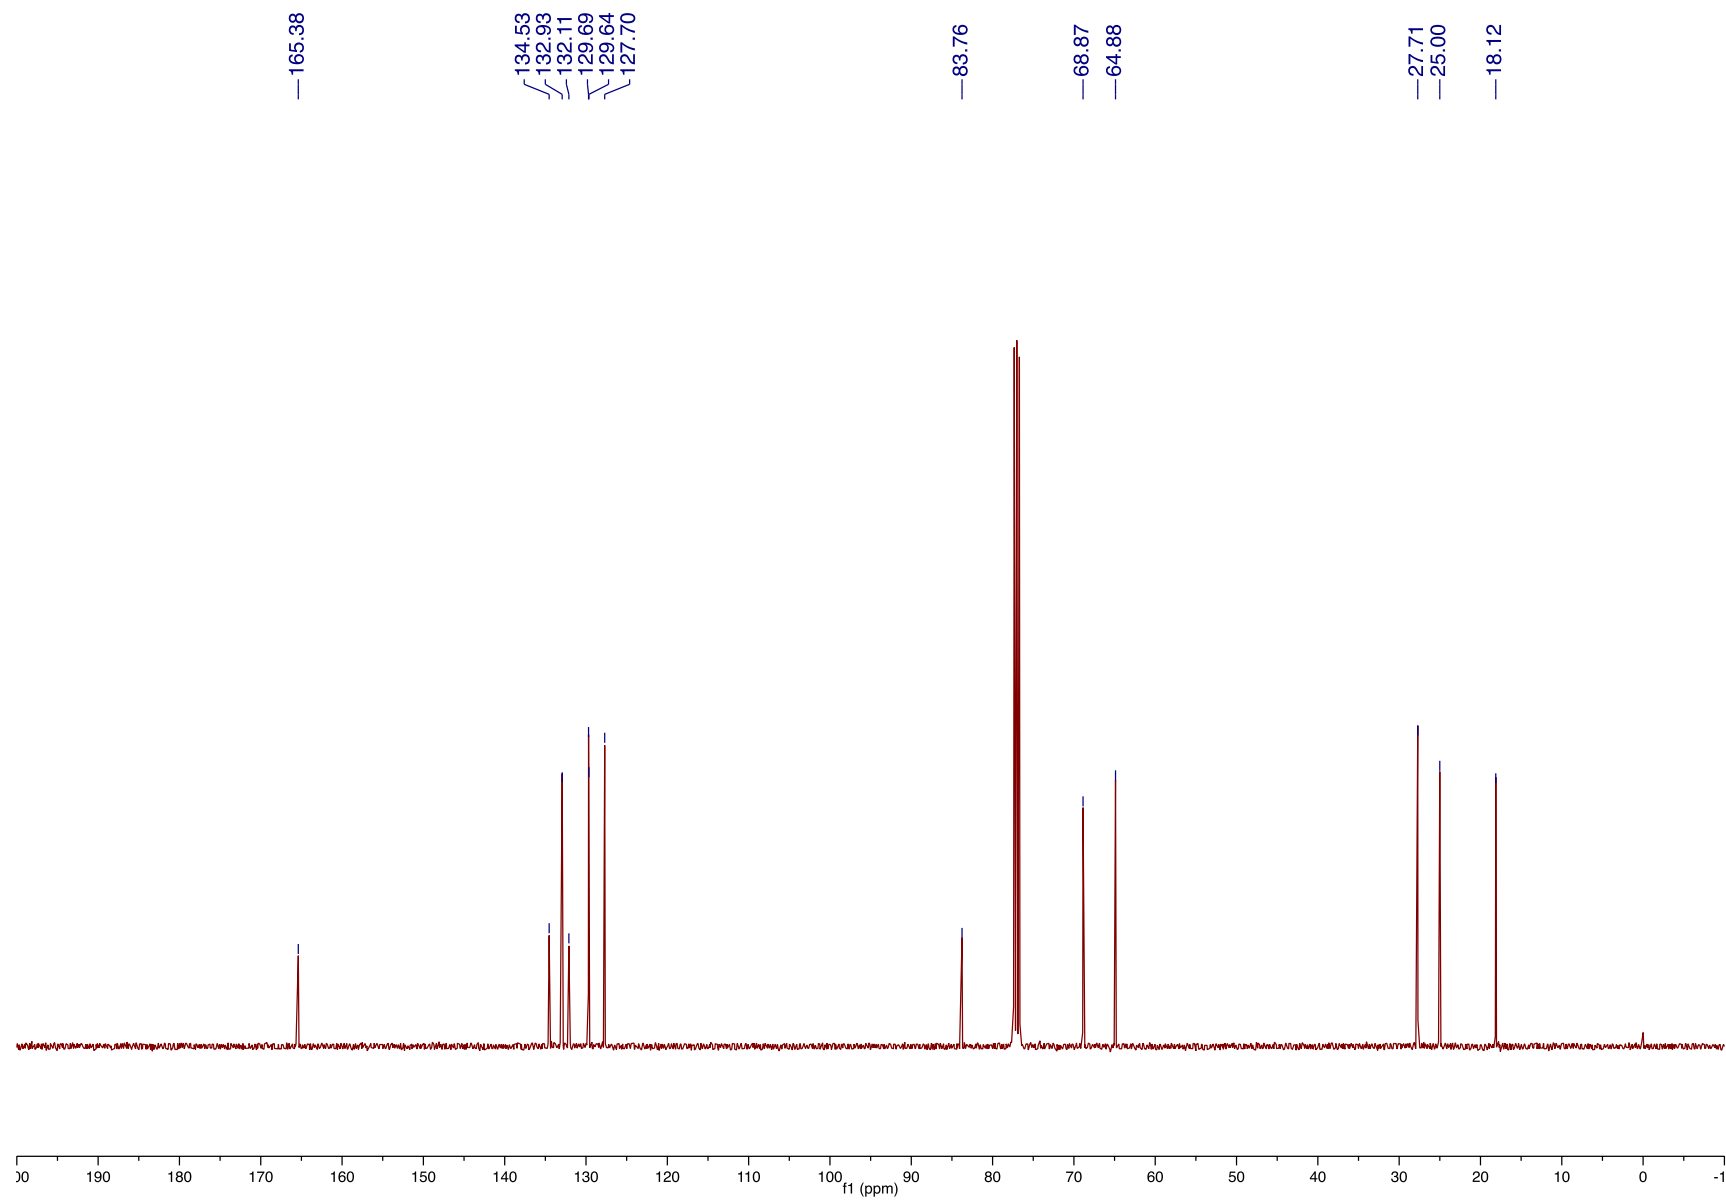

$^1\text{H}$  NMR (400 MHz,  $\text{CDCl}_3$ )

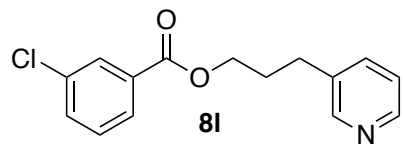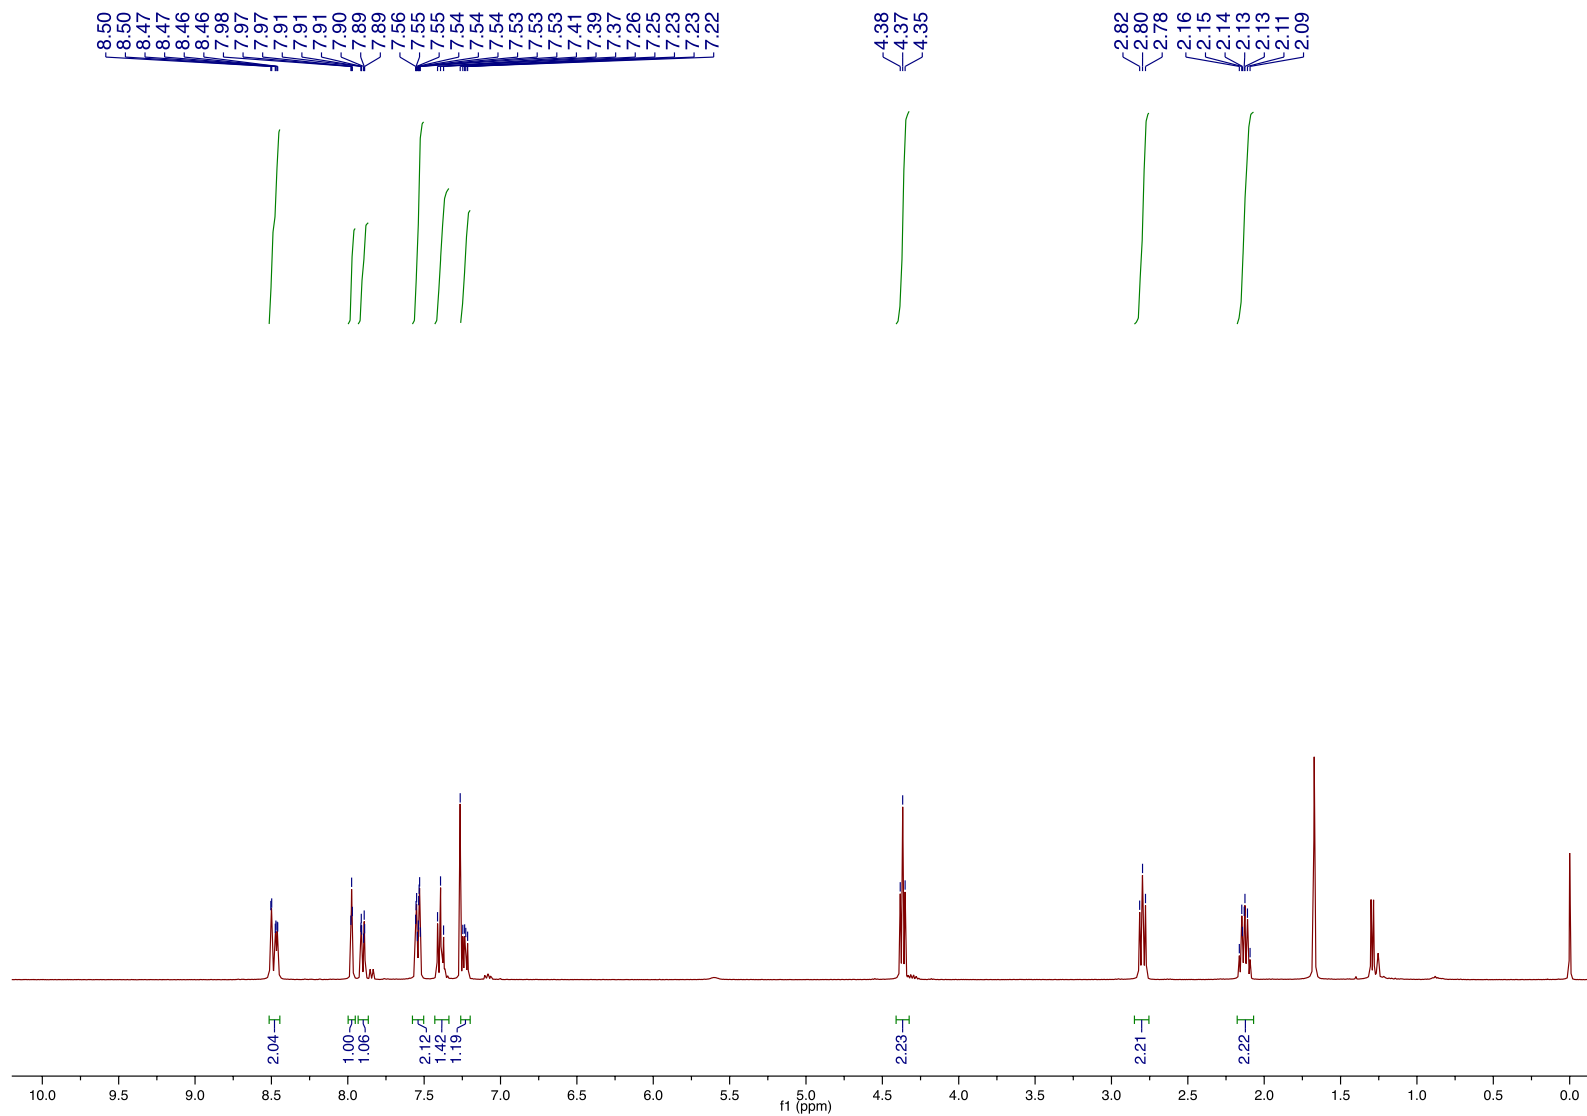

$^{13}\text{C}$  NMR (100 MHz,  $\text{CDCl}_3$ )

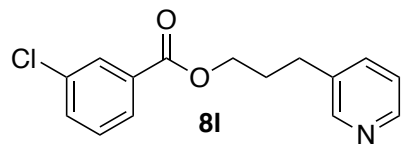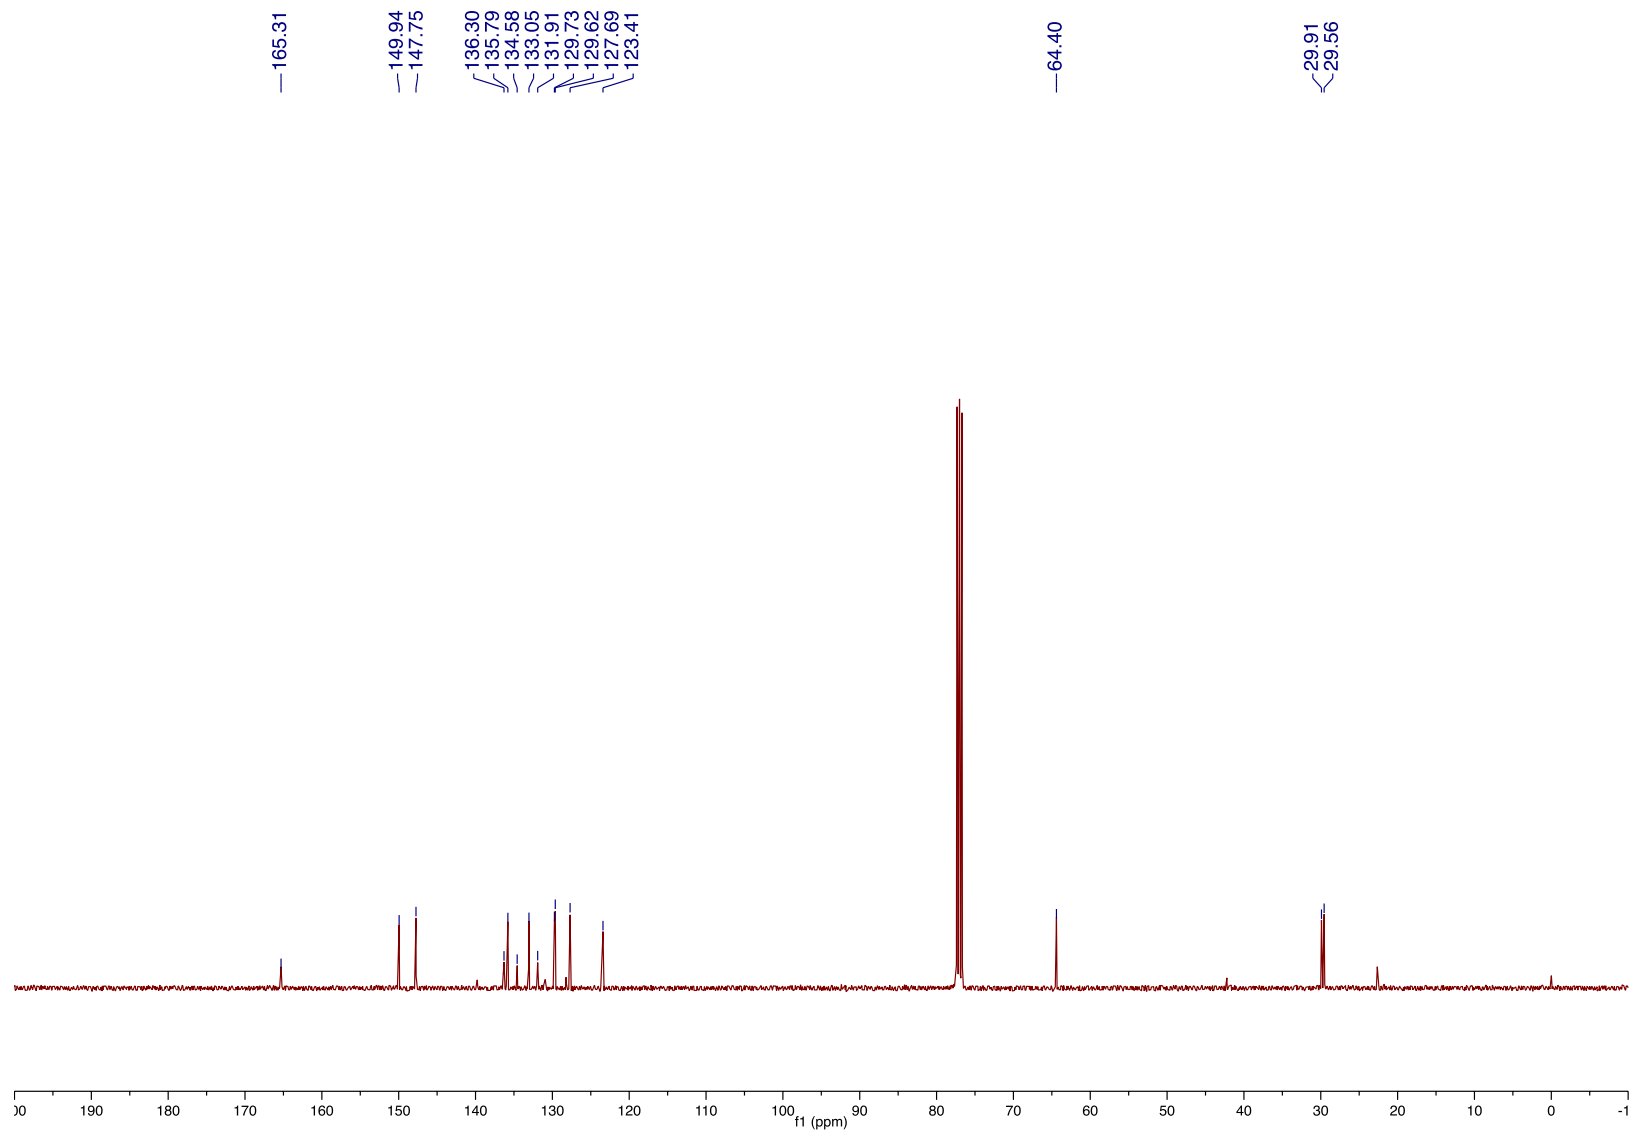

$^1\text{H}$  NMR (500 MHz,  $\text{CDCl}_3$ )

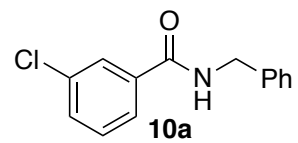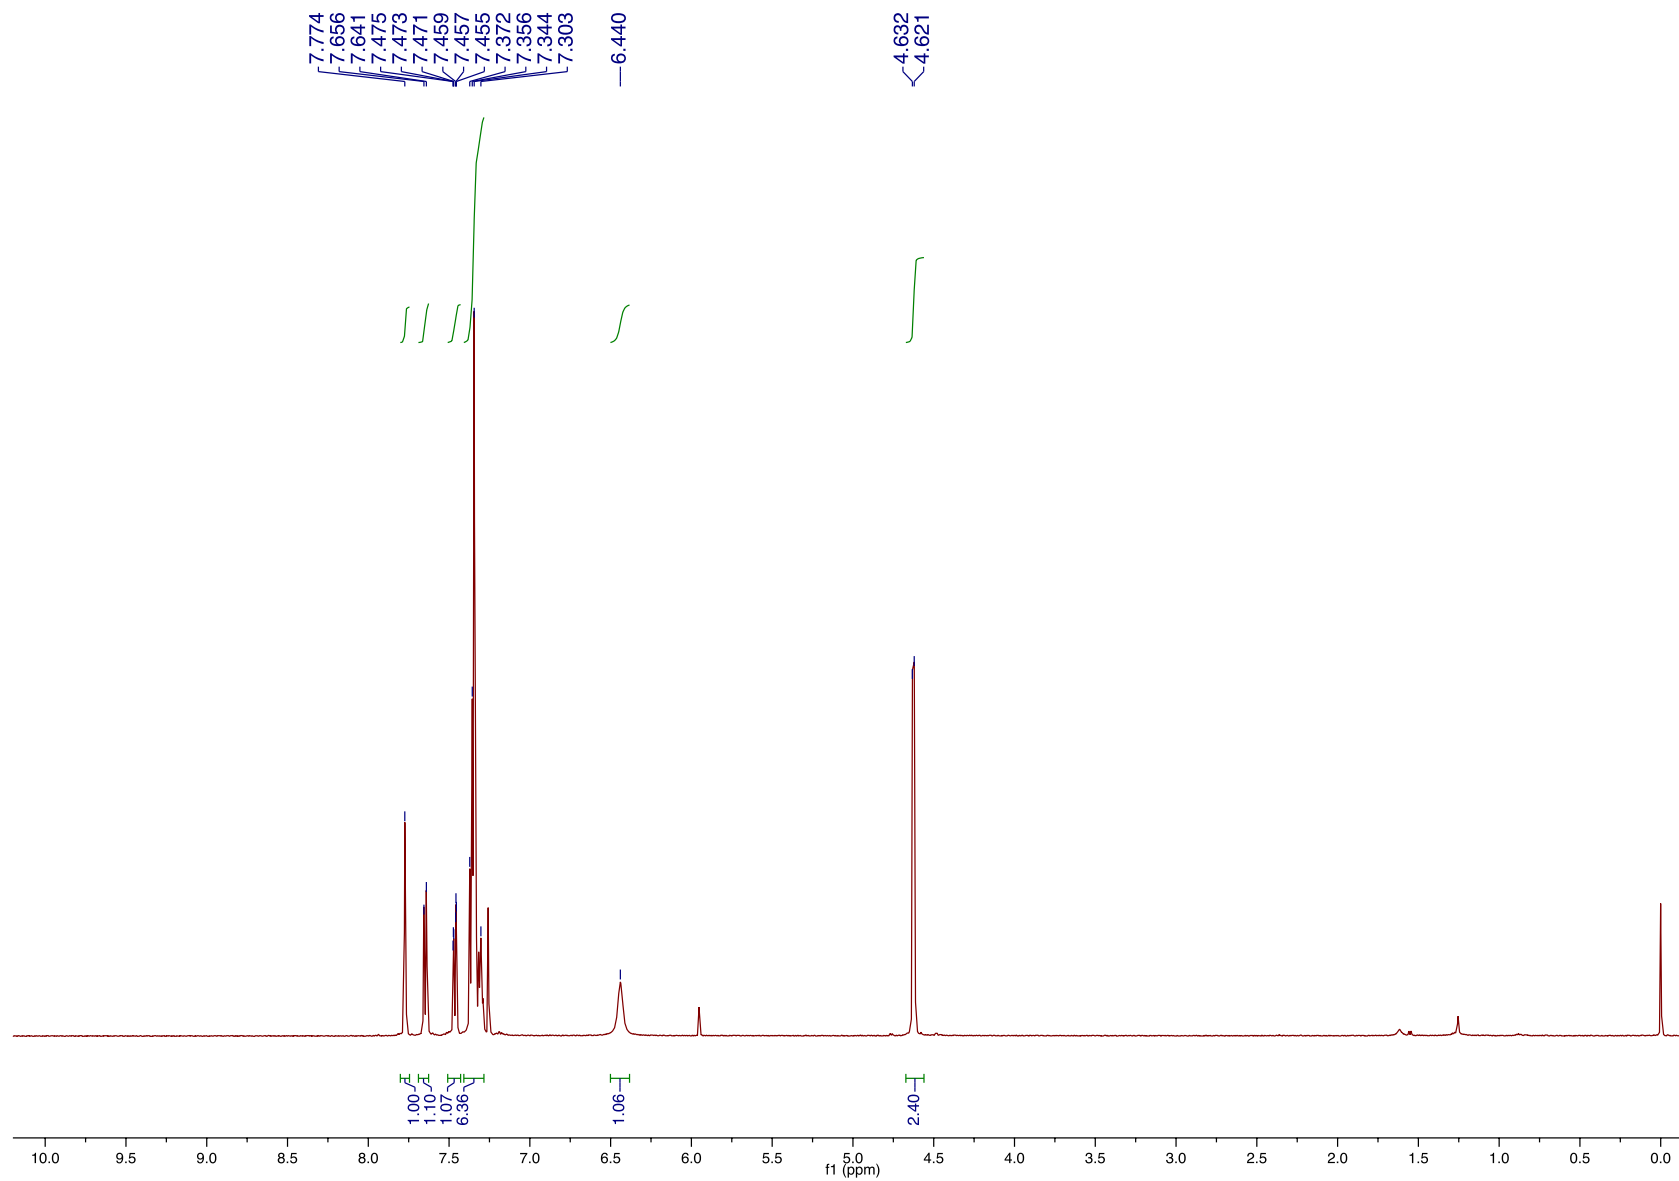

$^{13}\text{C}$  NMR (125 MHz,  $\text{CDCl}_3$ )

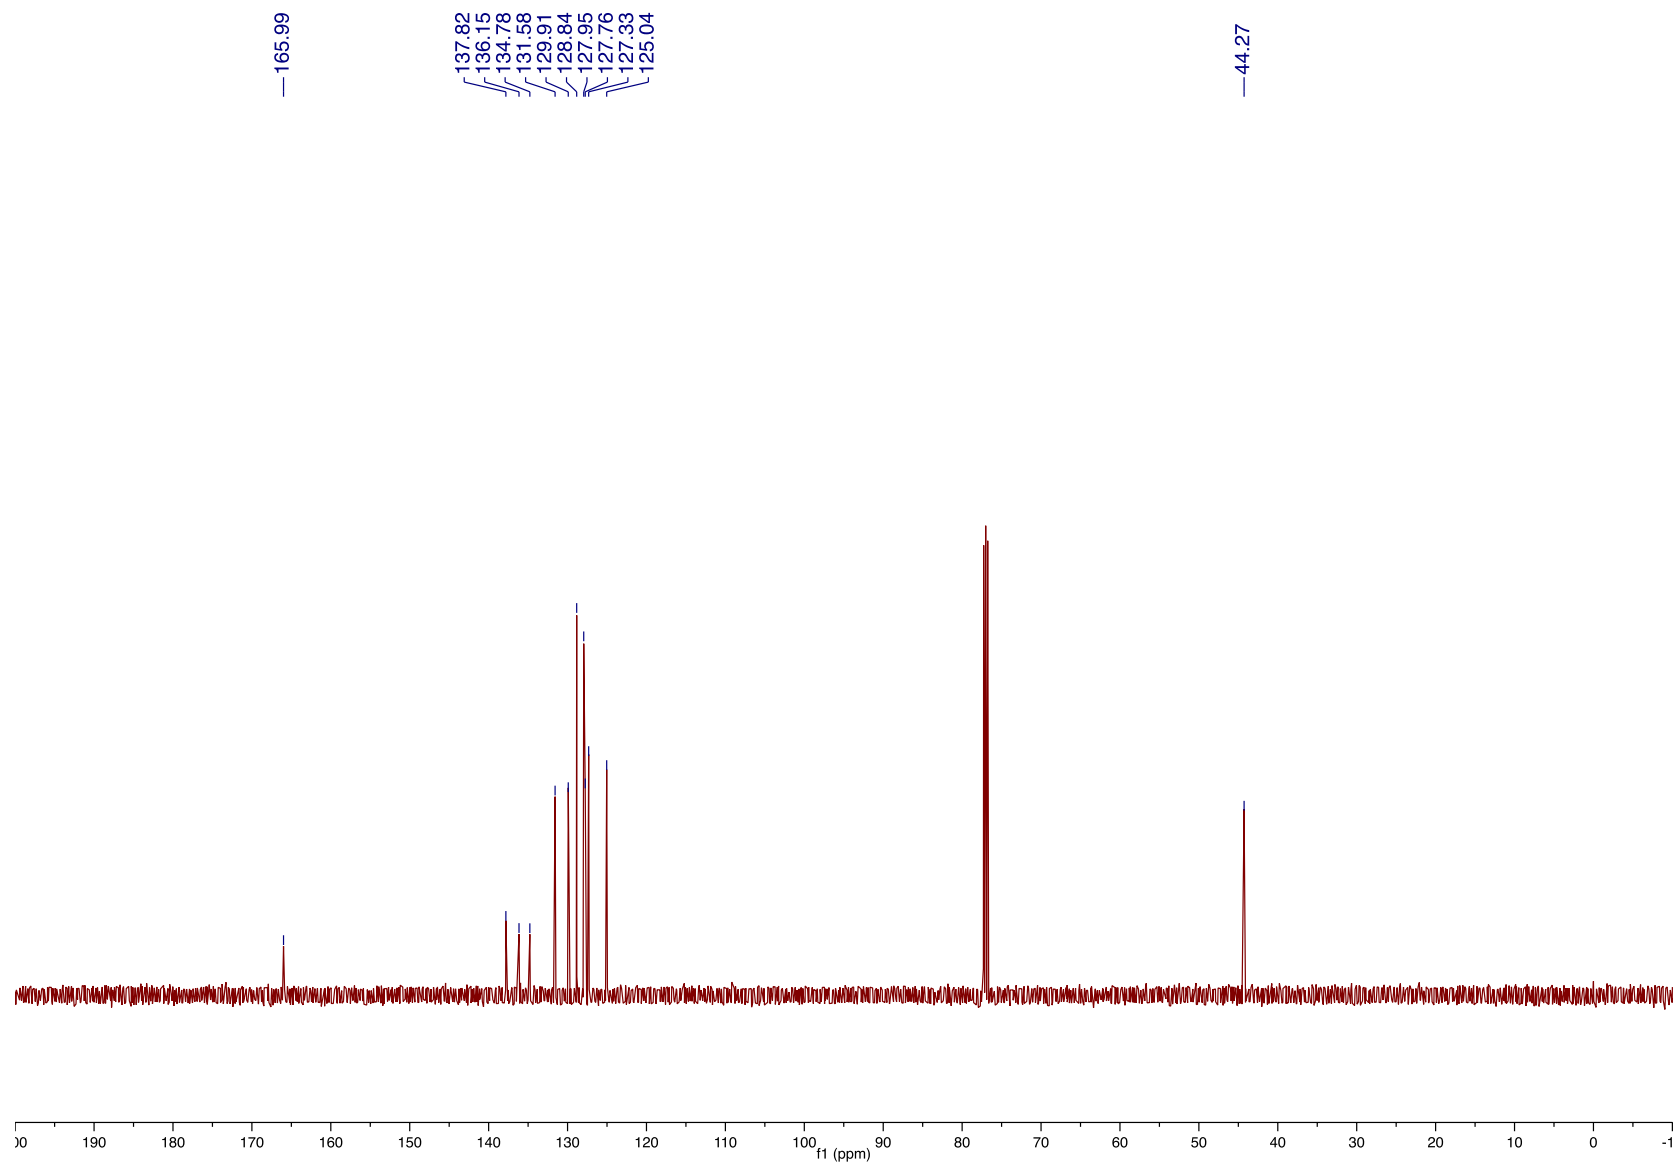

$^1\text{H}$  NMR (400 MHz,  $\text{CDCl}_3$ )

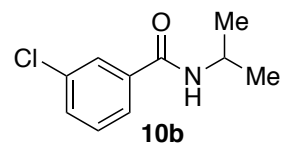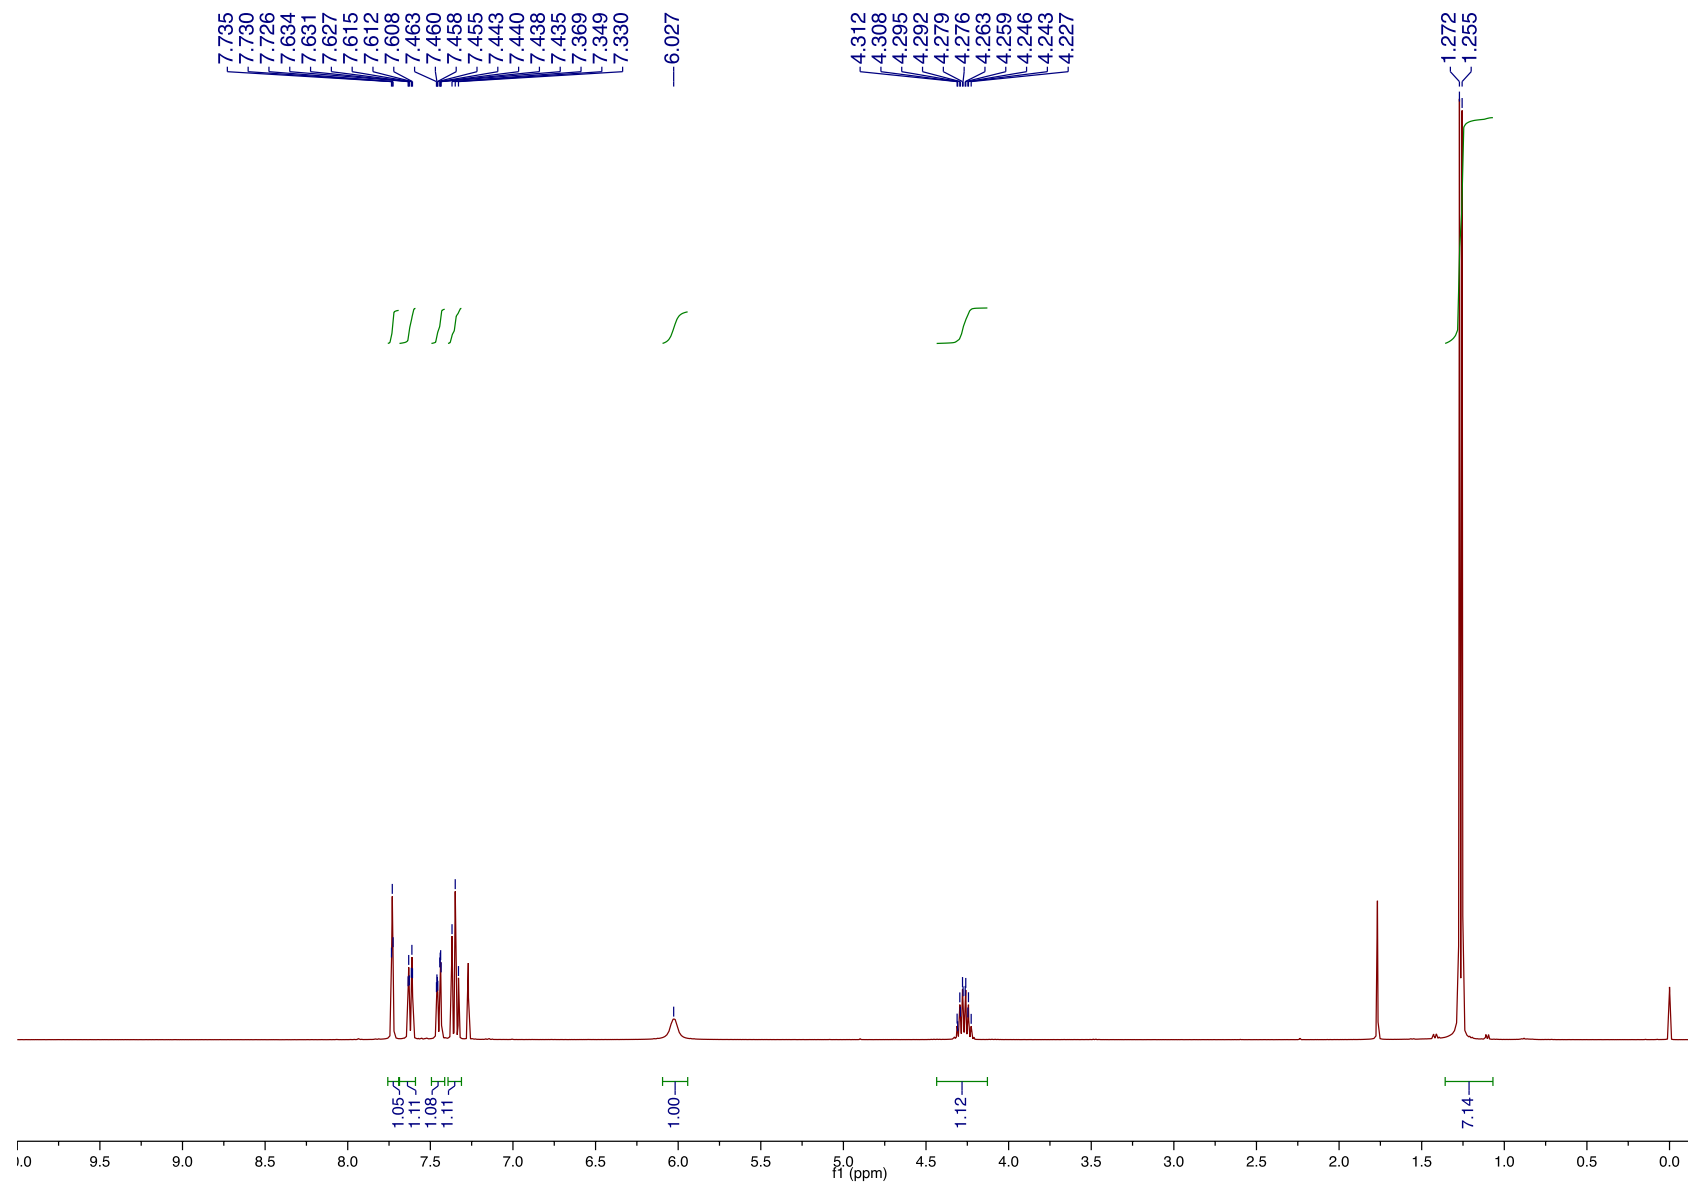

$^{13}\text{C}$  NMR (100 MHz,  $\text{CDCl}_3$ )

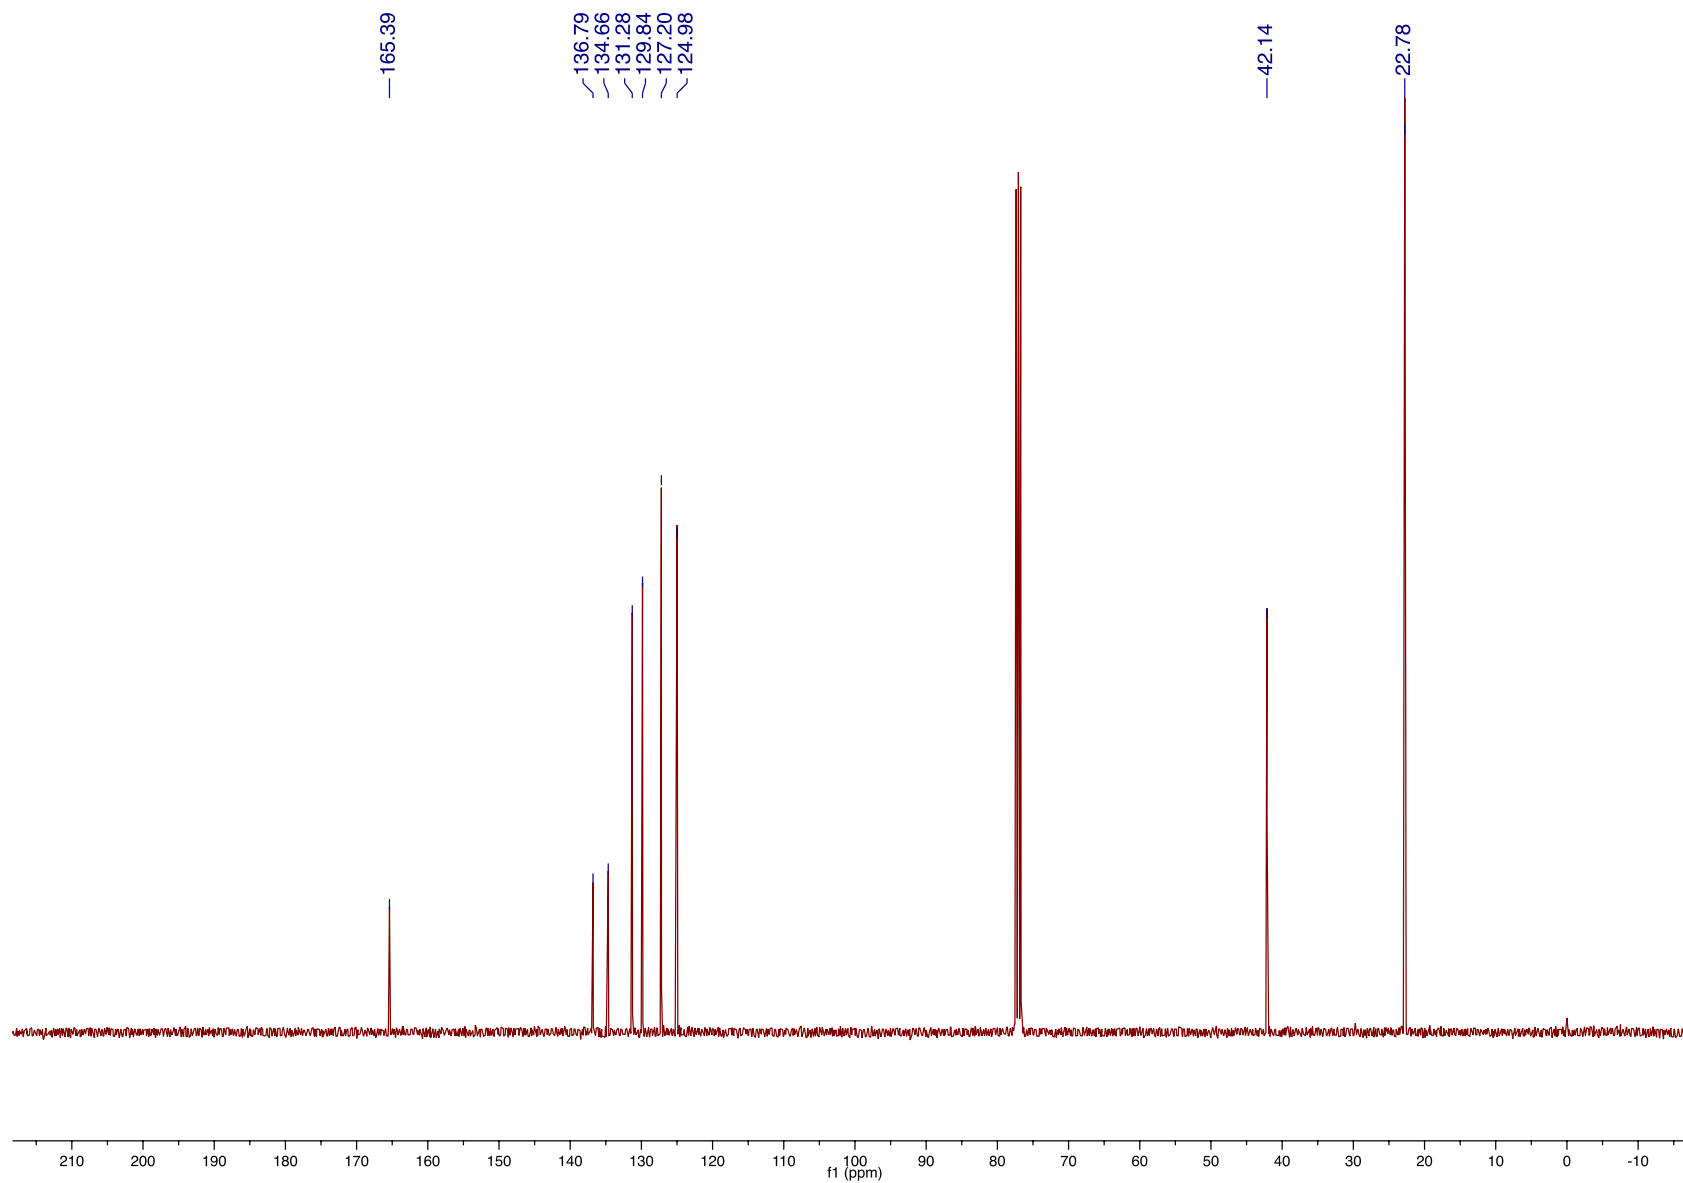



$^1\text{H}$  NMR (400 MHz,  $\text{CDCl}_3$ )

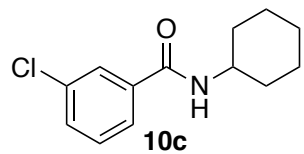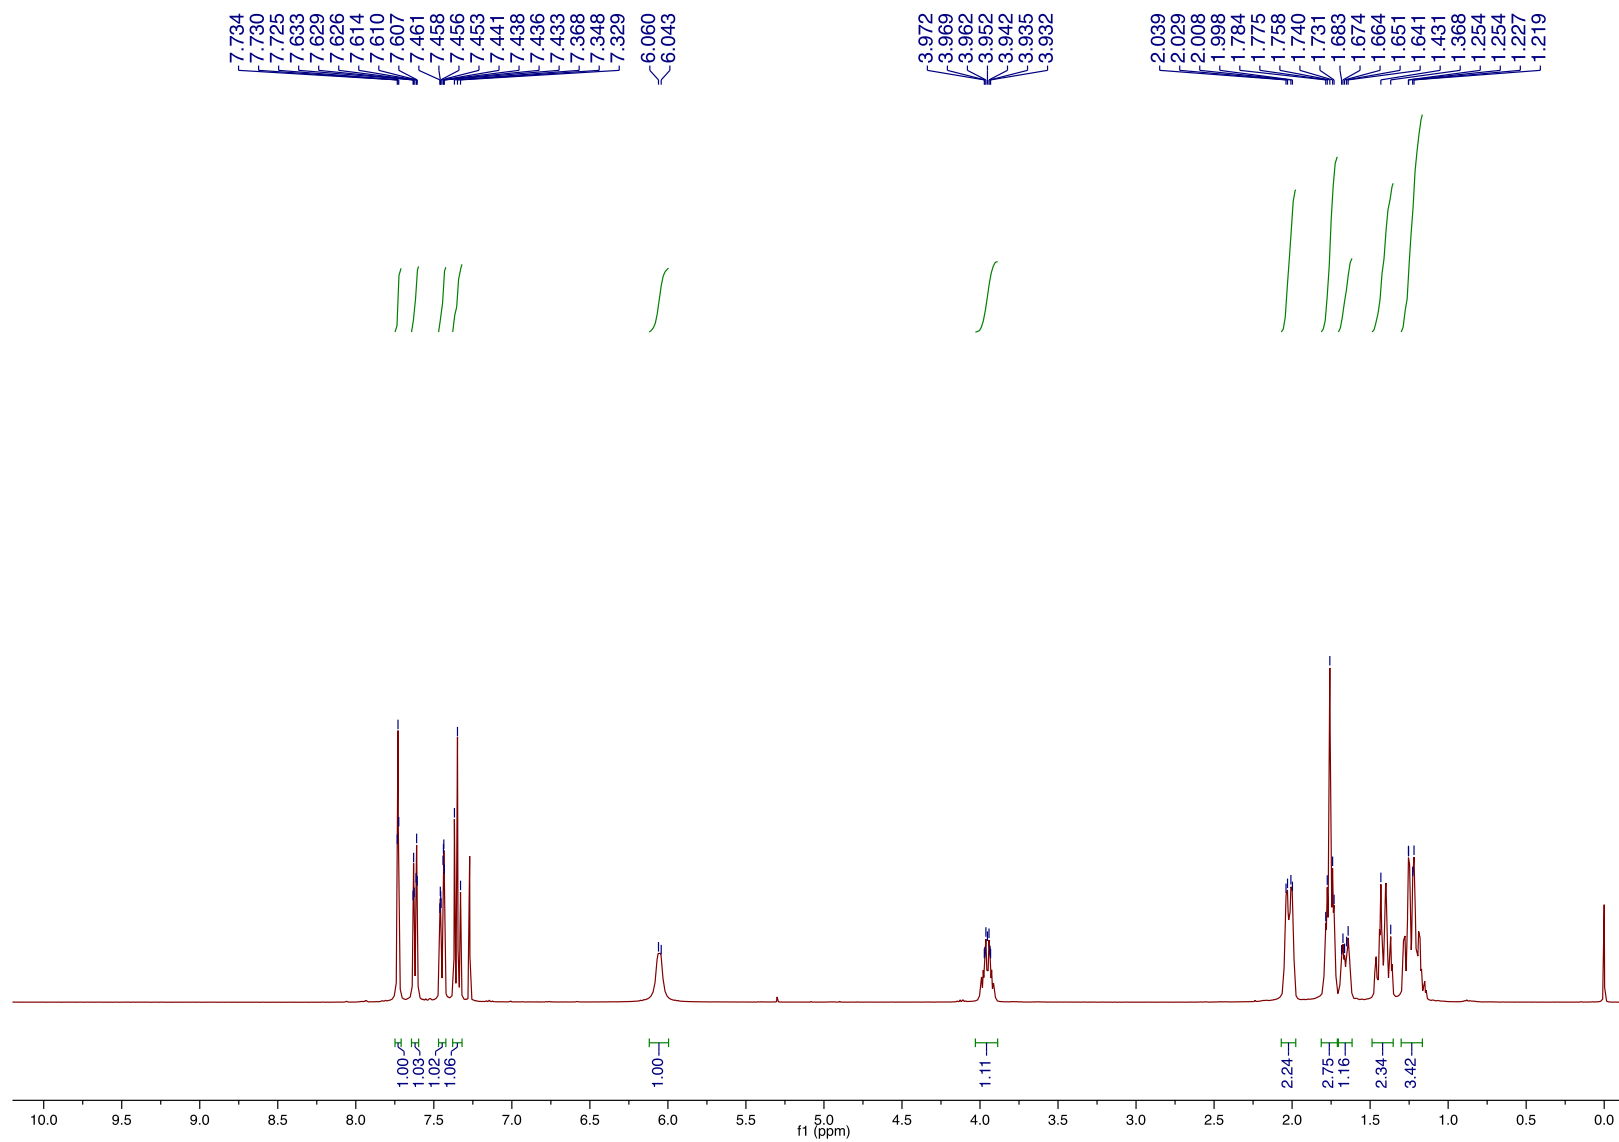

$^{13}\text{C}$  NMR (100 MHz,  $\text{CDCl}_3$ )

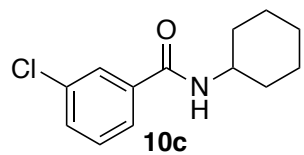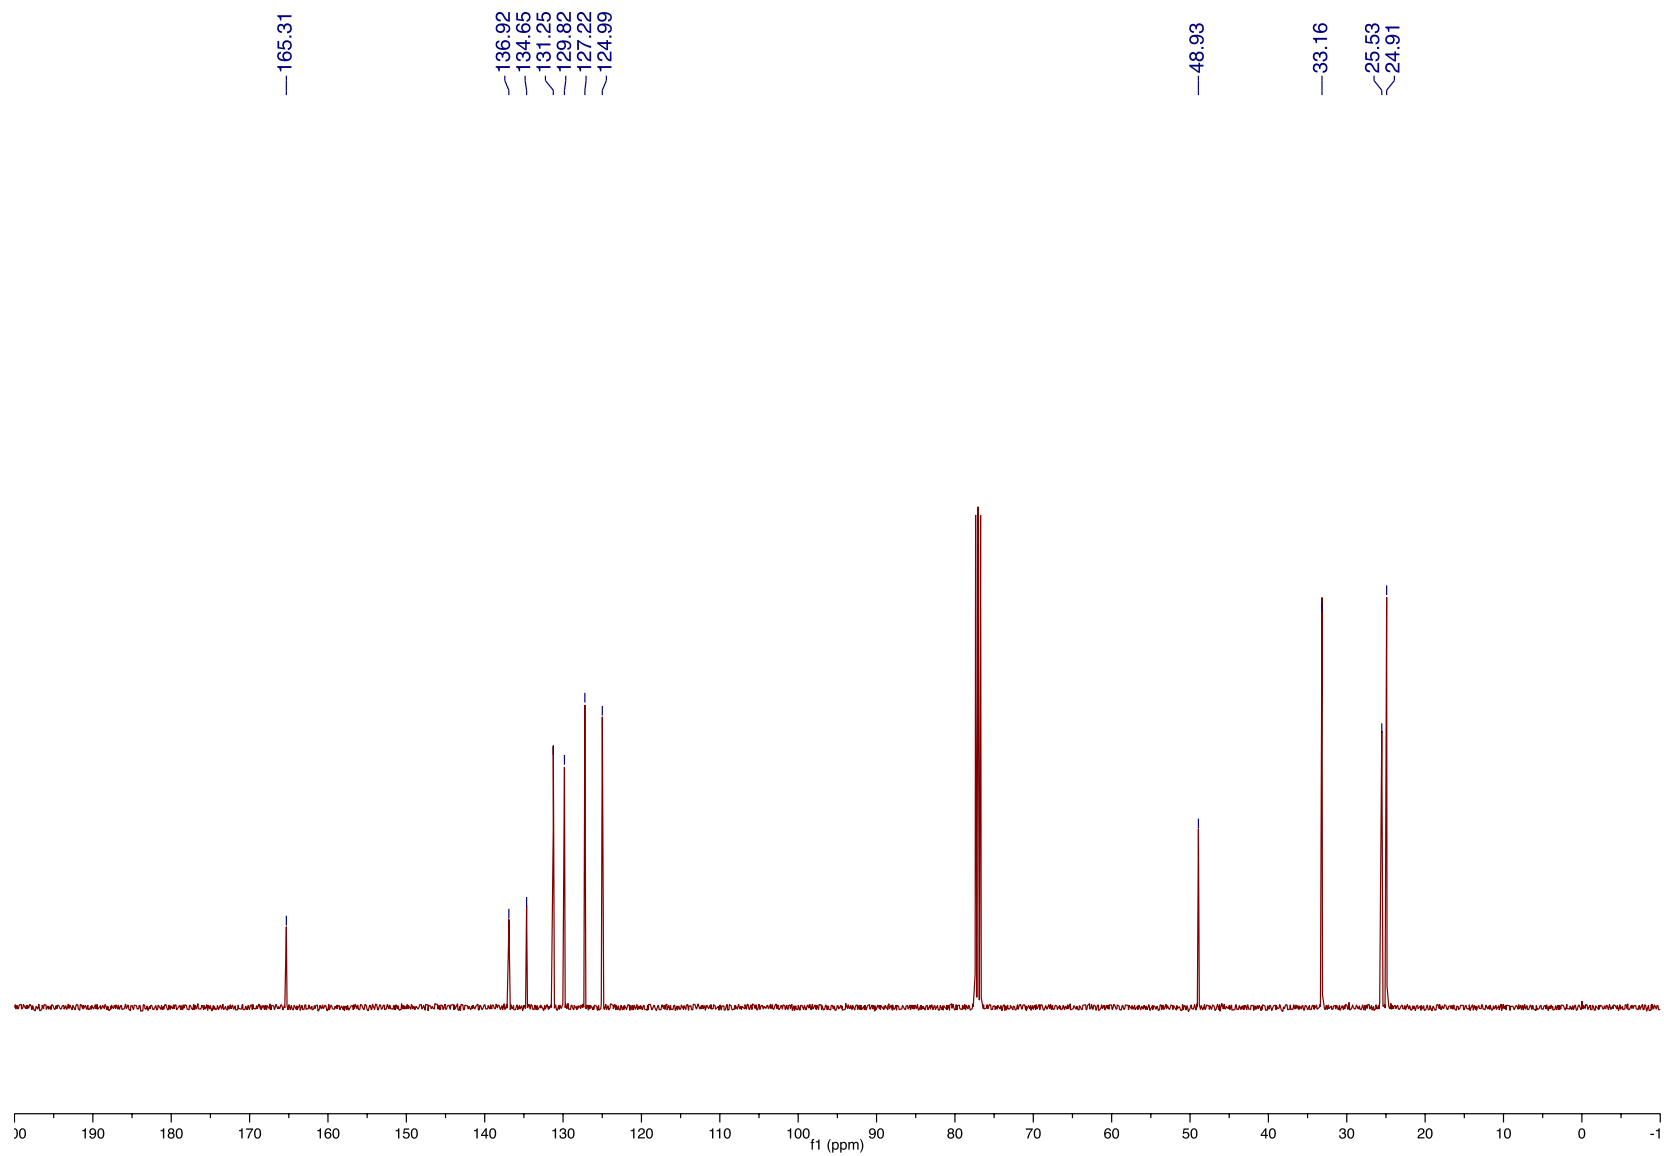

$^1\text{H}$  NMR (400 MHz,  $\text{CDCl}_3$ )

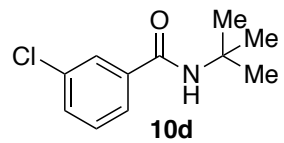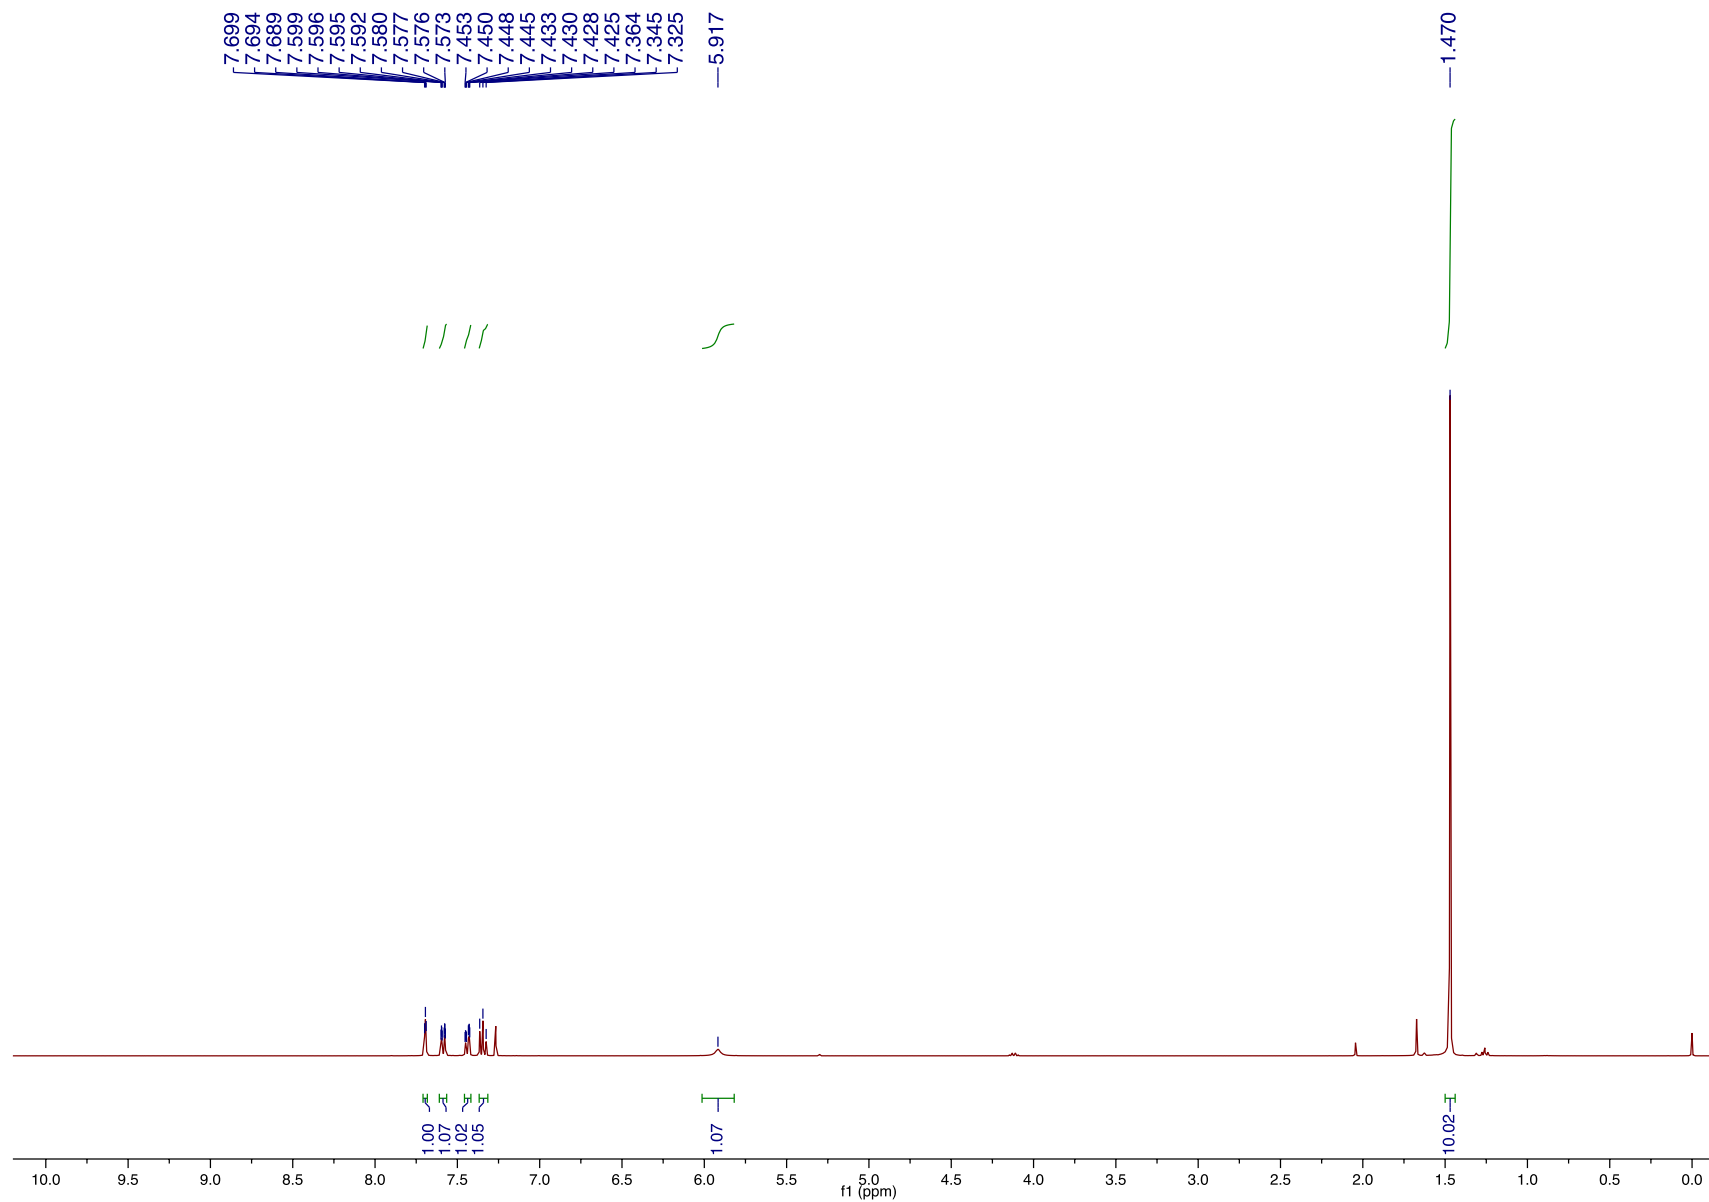

$^{13}\text{C}$  NMR (100 MHz,  $\text{CDCl}_3$ )

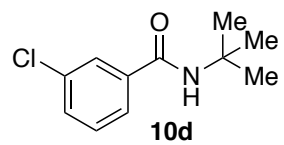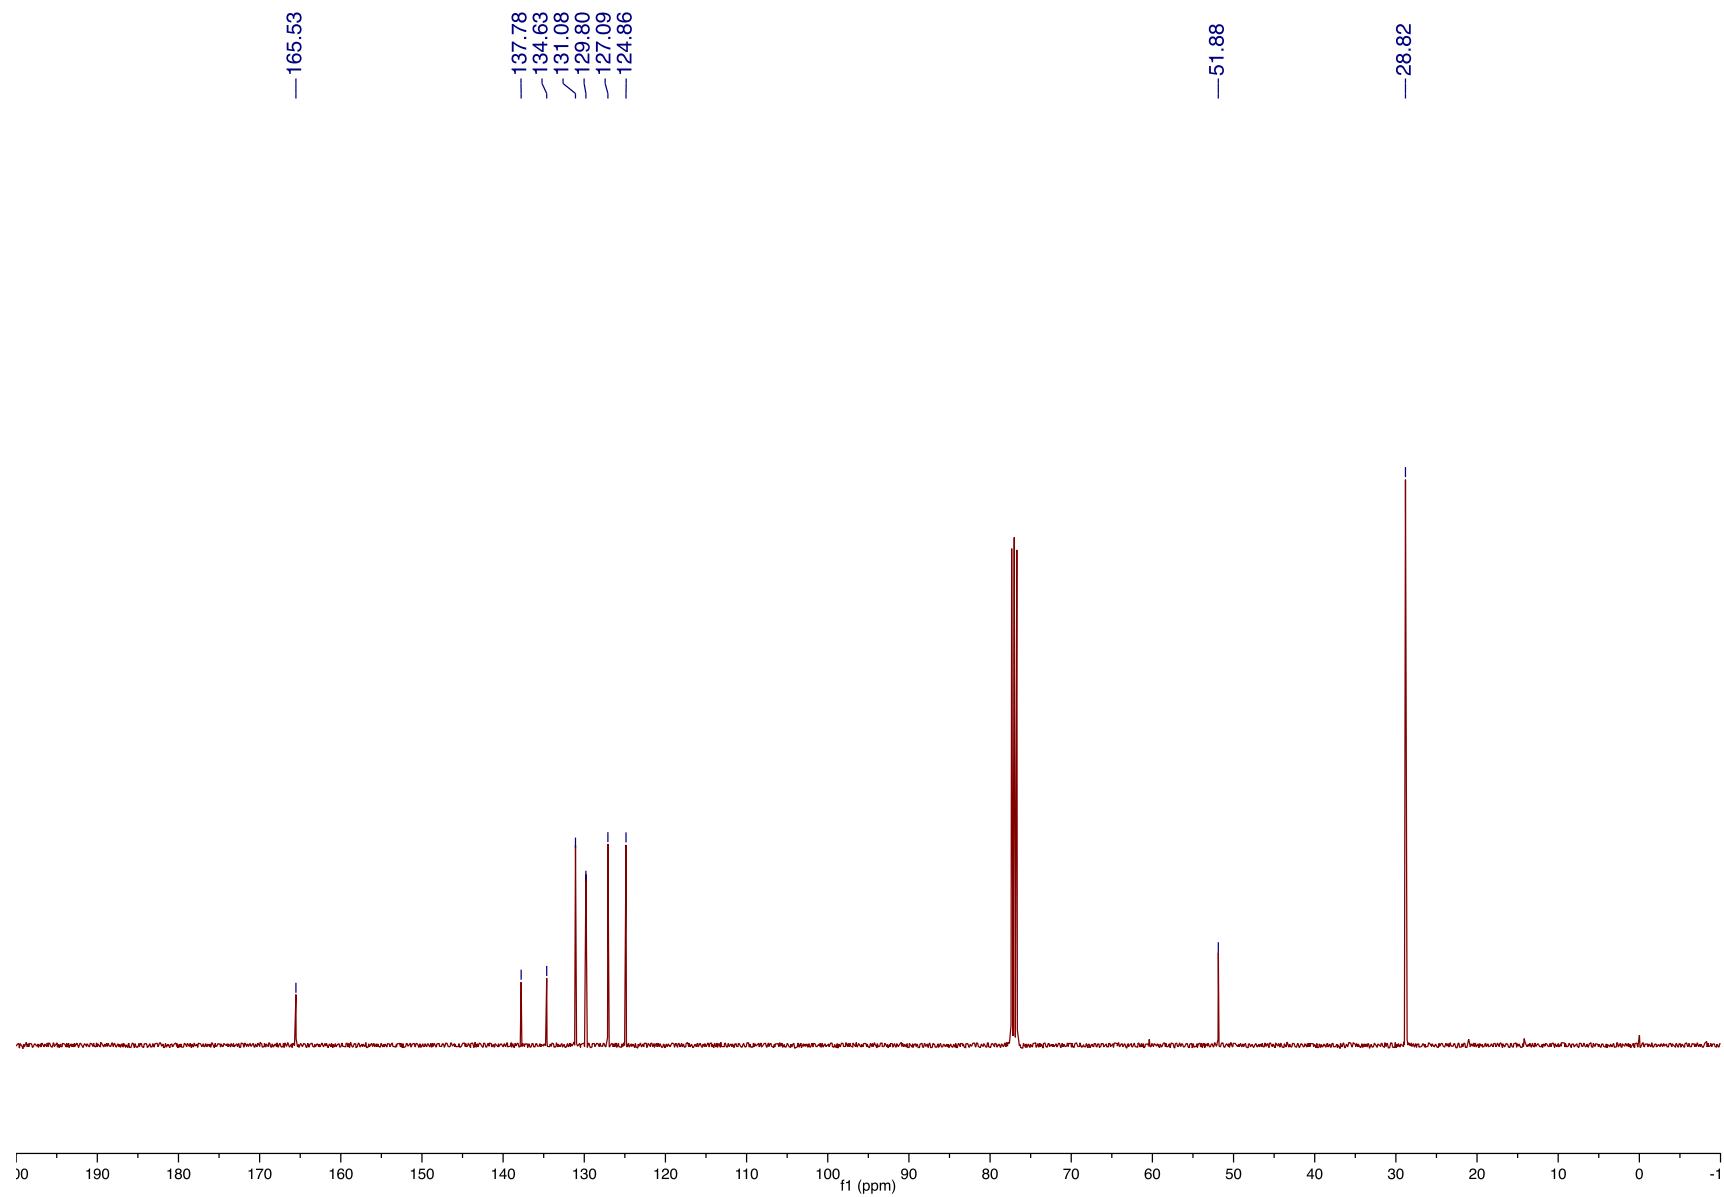

Supplement: s1 [file s1]
